# Supplementary material for: Effectiveness of internet-based support interventions on patients with breast cancer: a systematic review and narrative synthesis
Source: PubMed Central journal article supplement — BMJ Open. 2022 May 30;12(5):e057664. doi: 10.1136/bmjopen-2021-057664 (PMC9157353; doi:10.1136/bmjopen-2021-057664), 2022-05-30
Supplement: bmjopen-2021-057664.draft_revisions.pdf [file bmjopen-2021-057664.draft_revisions.pdf]

# BMJ Open

BMJ Open is committed to open peer review. As part of this commitment we make the peer review history of every article we publish publicly available.

When an article is published we post the peer reviewers' comments and the authors' responses online. We also post the versions of the paper that were used during peer review. These are the versions that the peer review comments apply to.

The versions of the paper that follow are the versions that were submitted during the peer review process. They are not the versions of record or the final published versions. They should not be cited or distributed as the published version of this manuscript.

BMJ Open is an open access journal and the full, final, typeset and author-corrected version of record of the manuscript is available on our site with no access controls, subscription charges or pay-per-view fees (<http://bmjopen.bmj.com>).

If you have any questions on BMJ Open's open peer review process please email [info.bmjopen@bmj.com](mailto:info.bmjopen@bmj.com)

# BMJ Open

## Effectiveness of Internet-based Support Interventions on Breast Cancer Patients : A Systematic Review and narrative synthesis

|                               |                                                                                                                                                                |
|-------------------------------|----------------------------------------------------------------------------------------------------------------------------------------------------------------|
| Journal:                      | <i>BMJ Open</i>                                                                                                                                                |
| Manuscript ID                 | bmjopen-2021-057664                                                                                                                                            |
| Article Type:                 | Original research                                                                                                                                              |
| Date Submitted by the Author: | 23-Sep-2021                                                                                                                                                    |
| Complete List of Authors:     | Huang, Yanwei; Xuzhou Medical College<br>Li, Qianqian; Xuzhou Medical College<br>Zhou, Fang; Xuzhou Medical College<br>Song, Jingyuan ; Xuzhou Medical College |
| Keywords:                     | ONCOLOGY, Breast tumours < ONCOLOGY, BIOTECHNOLOGY & BIOINFORMATICS, Telemedicine < BIOTECHNOLOGY & BIOINFORMATICS                                             |
|                               |                                                                                                                                                                |

SCHOLARONE™  
Manuscripts

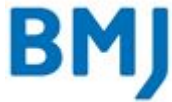

I, the Submitting Author has the right to grant and does grant on behalf of all authors of the Work (as defined in the below author licence), an exclusive licence and/or a non-exclusive licence for contributions from authors who are: i) UK Crown employees; ii) where BMJ has agreed a CC-BY licence shall apply, and/or iii) in accordance with the terms applicable for US Federal Government officers or employees acting as part of their official duties; on a worldwide, perpetual, irrevocable, royalty-free basis to BMJ Publishing Group Ltd ("BMJ") its licensees and where the relevant Journal is co-owned by BMJ to the co-owners of the Journal, to publish the Work in this journal and any other BMJ products and to exploit all rights, as set out in our [licence](#).

The Submitting Author accepts and understands that any supply made under these terms is made by BMJ to the Submitting Author unless you are acting as an employee on behalf of your employer or a postgraduate student of an affiliated institution which is paying any applicable article publishing charge ("APC") for Open Access articles. Where the Submitting Author wishes to make the Work available on an Open Access basis (and intends to pay the relevant APC), the terms of reuse of such Open Access shall be governed by a Creative Commons licence – details of these licences and which [Creative Commons](#) licence will apply to this Work are set out in our licence referred to above.

Other than as permitted in any relevant BMJ Author's Self Archiving Policies, I confirm this Work has not been accepted for publication elsewhere, is not being considered for publication elsewhere and does not duplicate material already published. I confirm all authors consent to publication of this Work and authorise the granting of this licence.

**Title page**

**Title of the article** Effectiveness of Internet-based Support Interventions on Breast Cancer

Patients:A Systematic Review and narrative synthesis

**Corresponding authors** Yanwei Huang<sup>1\*</sup>, Qianqian Li<sup>2\*</sup>, Fang Zhou<sup>1</sup>, Jingyuan Song<sup>1</sup>

**Author affiliations** <sup>1,2</sup>School of Nursing, Xuzhou Medical University, Xuzhou, Jiangsu 221002, China

**Correspondence to** Dr Jingyuan Song; songjy@xzhmu.edu.cn

**E-mail** Yanwei Huang:1450482349@qq.com

Qianqian Li: 2582940386@qq.com

Fang Zhou: zhoufang@xzhmu.edu.cn

**Word Count** 4264

---

**Correspondence to**

Dr Jingyuan Song; songjy@xzhmu.edu.cn

**ABSTRACT**

**Objective** To identify the elements and assess effectiveness of Internet-based support intervention on psychological distress, symptoms of anxiety and/or depression, physical variables (distress, severity, and/or prevalence), social support, self-efficacy, and quality of life in patients with breast cancer patients and guide future research in this field.

**Design** Systematic review and narrative synthesis

**Methods** Web of Science, Cochrane Library, PubMed, MEDLINE, PSycINFO, CINAHL, China National Knowledge Infrastructure and other databases were searched by computer and assisted by manual search. The search time frame is since the establishment of the database to June 2021. Included were randomized controlled trials (RCTs) or quasi-experimental (QE) studies focusing on Internet-based support interventions in breast cancer patients. The quality of the evidence was assessed with the Cochrane risk of bias tool and the quality evaluation criteria of the Australian JBI evidence-based Health Care Center.

**Results** Out of 2842 articles, 136 qualified articles were preliminarily identified. After further reading the full text, 35 references were included, including 30 randomized controlled trials and 5 quasi-experimental studies. Internet-based support interventions have demonstrated positive effects on women's quality of life and physical variables (distress, severity, and/or prevalence), but inconsistent effectiveness has been found on psychological distress, symptoms of anxiety and/or depression, social support, and self-efficacy.

**Conclusions** Internet-based support interventions are increasingly being used as clinically promising interventions to promote the health outcomes of breast cancer patients. Future research needs to implement more rigorous experimental design and include sufficient sample size to clarify the effectiveness of this Internet-based intervention.

**PROSPERO registration number** CRD42021271380.

**Keywords: breast cancer** Internet; support; effectiveness; systematic review

### Strengths and limitations of this study

- ▶ Comprehensive search using a sensitive search strategy identified a lot of potential correlation research.
- ▶ Tailored Internet-based support intervention that included comprising multicomponent is needed for breast cancer.
- ▶ Multifaceted interventions that included information support , symptom management , behavior management , psychological support, communication with health professionals or peer support appear to be useful in improving the quality of life among breast cancer.
- ▶ Due to the differences in research subjects, intervention contents, intervention programs, outcome indicators, and measurement instruments, no data synthesis was conducted for meta-analysis, and only narrative analysis was conducted.
- ▶ There is insufficient evidence to determine whether any component combination is superior to other component combinations in improving the quality of life.

### INTRODUCTION

Breast cancer is currently the most common malignant tumor in women worldwide<sup>1</sup>. Breast cancer (BC) ranks first in the incidence of female malignant tumors. World Health Organization(WHO) data show that the number of new cases of breast cancer in 2020 is as high as 2.26 million, exceeding lung cancer for the first time, becoming the world's largest high incidence of cancer<sup>2</sup>. The treatment of breast cancer patients is based on the comprehensive treatment of surgery, supplemented by chemotherapy, radiotherapy, endocrine therapy, targeted therapy, and other treatment methods. As the health system's effectiveness in early diagnosis and treatment has improved, the number of breast cancer survivors has also increased significantly<sup>3</sup>. However, the diagnosis and treatment of breast cancer bring patients varying degrees of symptomatic distress in the short term, such as pain, limited limb function, hair loss, nausea and vomiting, bone marrow suppression, and long-term physical and psychological distress symptoms such as impaired body image, fatigue, sleep disturbance, anxiety and depression, which seriously affect the quality of life, especially during chemotherapy. <sup>4-6</sup> The importance of supporting patients adequately regarding symptoms resulting from diagnosis and treatment has been widely recognized<sup>7</sup>. However, there are still many female breast cancer patients

1  
2  
3  
4 who report unmet supportive care needs, and these needs are mostly in the health system/information  
5 and psychology fields<sup>8, 9</sup>. Besides, the patient's symptom distress, self-efficacy, and social support are  
6 three interrelated factors that affect a person's ability to cope with chronic diseases<sup>10</sup>. All the above may  
7 lead to poor quality of life for patients with breast cancer.  
8  
9

10  
11 The survival rate of breast cancer is expected to continue to increase, leading to an increase in the  
12 number of patients requiring long-term care: this poses a challenge for the patients themselves, their  
13 families, and oncology services. However, geographical distance restrictions and scheduling issues  
14 challenge the feasibility of clinical face-to-face supportive care interventions<sup>11</sup>.  
15  
16

17  
18 To identify and meet the needs of this large patient population, the healthcare system is urged to  
19 develop and adopt (cost-effective) plans to educate and support patients. Conventional healthcare,  
20 however, can hardly achieve these goals because of time constraints, distance restrictions, high cost,  
21 and so on<sup>11</sup>. Thus, Internet technology is now common in both developed and developing countries  
22 (WHO 2011), and as the reform of medical rationalization reduces or restricts face-to-face services, the  
23 use of technologies to evaluate, educate, support, and interact with patients has become increasingly  
24 common. The use of smartphones and tablet applications, social media, and other mobile  
25 devices-provided support programs will become more and more common in the future. These tools can  
26 facilitate the provision of cancer care services to survivors in rural areas<sup>12</sup>. In addition, they are also  
27 used in treatment management to monitor symptoms, physical activity, psycho-oncology, and  
28 nutrition<sup>13</sup>. They support cancer survivors to develop a healthier lifestyle<sup>14</sup>. Moreover, to provide better  
29 support to cancer survivors, they may help promote coordination between interdisciplinary cancer  
30 treatment teams<sup>15</sup>.  
31  
32  
33  
34  
35  
36  
37  
38  
39  
40  
41  
42  
43

44 At present, medical personnel can provide customized supportive care for patients with the Internet  
45 as the carrier and information technology as the means (including mobile communication technology,  
46 cloud computing, Internet of Things, big data, etc.), which is also increasingly favored by cancer  
47 patients<sup>16, 17</sup>. Internet-based support interventions are defined as smartphones and tablets (including  
48 apps), websites, social media and other mobile devices-delivered support programs to provide  
49 information and facilitate communication regarding self-care management and adverse effects related  
50 to toxicities owing to breast cancer therapy<sup>7, 18, 19</sup>. Previous original studies have measured the  
51 effectiveness of Internet-based support interventions in cancer patients on psychological distress<sup>20, 21</sup>,  
52 social support<sup>22</sup>, physical symptoms (severity and/or distress)<sup>23</sup>, and QUALITY OF LIFE<sup>24, 25</sup>. Besides,  
53  
54  
55  
56  
57  
58  
59  
60

1  
2  
3  
4 more evidence is needed. In this fast-developing research field, it is important to regularly recapitulate  
5 its status. In addition, China is the world's most populous country, breast cancer is one of the most  
6 common malignant tumors in Chinese women<sup>26</sup>. This article integrates articles published in Chinese or  
7 English to help understand the impact of Internet-based support interventions on breast cancer patients  
8 at the global level<sup>22</sup> .  
9  
10  
11  
12

13 This systematic review aims to synthesize and descriptively analyze the effectiveness of Internet  
14 support intervention studies on psychological distress, symptoms of anxiety and/or depression, physical  
15 variables (distress, severity, and/or prevalence), social support, self-efficacy, and quality of life in  
16 breast cancer patients in English and Chinese.  
17  
18  
19  
20  
21  
22

## 23 **METHODS**

24 We performed a systematic review based on PRISMA guidelines, and it was registered in PROSPERO  
25 (CRD 42021271380) from [https://www.crd.york.ac.uk/PROSPERO/display\\_record.php?RecordID=271380](https://www.crd.york.ac.uk/PROSPERO/display_record.php?RecordID=271380).  
26  
27  
28  
29  
30  
31  
32

### 33 **Search strategy**

34 Seven electronic databases were searched: Web of Science, Cochrane Library, PubMed, MEDLINE,  
35 PSycINFO, CINAHL, China National Knowledge Infrastructure. We searched the articles from the  
36 inception of each database to June 2021. The search keywords included “breast neoplasm OR breast  
37 cancer” AND “Telemedicine OR online OR Internet OR connected health OR telehealth OR e-health  
38 OR m-health OR e-intervention OR e-technology OR computer OR mobile application OR mobile  
39 device OR social media OR WeChat” AND “patient education OR intervention OR support OR  
40 teaching OR instruction\* OR program\* OR psychoeducat\* OR self-management OR Social Support  
41 OR support system\* OR support group\*”  
42  
43  
44  
45  
46  
47  
48  
49  
50  
51

### 52 **Inclusion and Exclusion Criteria**

53 In this systematic review, we included the following: (1) The population is adult women with breast  
54 cancer patients, (2) Studies about Internet-based support interventions, defined as smartphones and  
55 tablets (including apps), website, social media and other mobile devices-delivered support programs to  
56 provide information and facilitate communication regarding self-care management and adverse effects  
57  
58  
59  
60



1  
2  
3  
4 related to toxicities owing to breast cancer therapy, (3) All interventional study types including  
5 non-randomized controlled trials or quasi-experimental intervention studies were considered, (4)  
6 Outcome variables in the study included one of the following, such as psychological distress,  
7 symptoms of anxiety and/or depression, physical variables (distress, severity and/or prevalence), social  
8 support, self-efficacy and QUALITY OF LIFE, and (5) Articles were written in English or Chinese.  
9  
10  
11  
12

13 Studies were excluded for the following reasons: (1) if they focused on Internet-based support  
14 interventions related to other types of cancer, (2) Study types include review, non-clinical study,  
15 meta-analysis, etc, (3) The full text cannot be obtained; (4) Repeated publications.  
16  
17  
18  
19  
20

### 21 **Study selection and data extraction**

22  
23 All stages of study selection, data extraction was conducted by two researchers independently, and  
24 disagreements were resolved by consultation with a third researcher. For included studies, the following data  
25 were extracted with a pre-specified data extraction form, including population characteristics (groups,  
26 sample), study characteristics (author(s), country and year of publication), intervention characteristics  
27 (theoretical framework and description), and outcome characteristics (primary outcomes and main  
28 conclusions). Missing data would be obtained from authors by email, if possible.  
29  
30  
31  
32  
33  
34  
35  
36

### 37 **Data synthesis**

38 The data synthesis was undertaken following CRD's guidance<sup>27</sup>. This study follows the narrative synthesis  
39 method of Popay *et al*, and conducts narrative synthesis in a systematic and transparent way, focusing on the  
40 effect and content elements of intervention measures<sup>28</sup>. The heterogeneity of the data in terms of  
41 interventions, instruments, and outcome measures did not allow for comparison between studies or clinically  
42 meaningful interpretations. A meta-analysis was therefore not considered to be appropriate for analyzing the  
43 data.  
44  
45  
46  
47  
48  
49  
50  
51

### 52 **Assessment of risk of bias**

53  
54 The quality of RCTs and pre-post design studies was assessed using the Cochrane Collaboration's risk  
55 of bias tool<sup>29</sup>. This tool rates 7 domains as having a low, unclear, or high risk of bias. These domains  
56 consist of sequence generation, allocation concealment, participants' and study personnel's blinding;  
57 outcome assessment blinding; outcome data completeness; selective outcomes' reporting; and other  
58  
59  
60

1  
2  
3  
4 threats to validity, including intervention contamination, baseline imbalance, and carry-over effect in  
5 cross-over trials). In addition, we used the quality evaluation criteria of the Australian JBI  
6 evidence-based Health Care Center to evaluate the documentation quality of quasi-experimental  
7 studies. The overall quality of the quasi-experimental research is evaluated from 9 items including  
8 causality, baseline, intervention, control, outcome index measurement, follow-up and analysis.  
9  
10  
11  
12

### 13 14 15 **Patient and Public Involvement**

16 No patient involved.  
17  
18  
19

## 20 21 **RESULTS**

### 22 23 **Selection of studies**

24 A total of 2842 references were obtained through database retrieval and reference traceback. After  
25 reading the titles and abstracts to exclude duplicates, 136 references were obtained through preliminary  
26 screening. After further reading the full text, 35 references were finally included per all inclusion and  
27 exclusion criteria established for the systematic review.  
28  
29  
30  
31  
32

### 33 34 35 **Study characteristics and risk of bias**

36 Characteristics of the included studies are summarized in Table 1. A total of 35 articles were included  
37 in this literature review. Sixteen studies were undertaken in mainland China, six in the United States,  
38 two in the Netherlands, two in Australia, two in Sweden, One study each in Taiwan, Turkey,  
39 Switzerland, Italy, Japan, Korea and Ireland. Twenty-eight study designs were RCTs, the other seven  
40 study designs were quasi-experimental studies.  
41  
42  
43  
44  
45

46 The transmission carriers of Internet support intervention include website platform (n=9),  
47 mobile application program (n=13), WeChat platform (n=11), comprehensive health enhancemen  
48 t system (n=1), survival nursing system (n=1), and follow-up system based on clinical decision  
49 support algorithm (n=1). There are 10 articles on personalized customization intervention.  
50  
51  
52

53 In this review, of the 30 randomized controlled trials included, 6 were rated as grade C in  
54 methodological quality, 23 were rated as grade B, and 1 was of high quality, as shown in Table 1.  
55  
56 Among the 5 experimental studies included in this review, the quality grade is B, as shown in Table 2.  
57  
58  
59  
60

### Description of participants

The 35 studies consisted of 5368 patients. The participant sample sizes ranged from 29 to 638 participants. The mean ages ranged from 41.1~59.9 years. Seven studies analyzed patients with locally or locally advanced cancer (stages I-III), whereas three studies only included cancer patients with stages I-II<sup>30-32</sup>. Five studies included solely patients who had completed cancer treatment during their follow-up<sup>33-37</sup>, twenty-seven studies only included patients during treatment and four studies patients in all treatment phases<sup>34, 35, 38, 39</sup>.

### Content elements of Internet-based support Intervention Internet-based support

Internet-based support intervention involves six topics: (1) Information support (n=33): including breast cancer disease, treatment and rehabilitation-related knowledge, available aid resources or organizational service information, expert consultation or outpatient consultation arrangements, and expert lectures. (2) Symptom management (n=9): including patients' self-assessment and monitoring of their physiological symptoms, medical staff's self-management guidance for patients, automatic feedback of symptom management APP or system, and symptom early warning processing combined with clinical risk algorithm. (3) Behavior management (n=3): including medication compliance management, limb functional exercise compliance management, infusion port maintenance, healthy lifestyle management. (4) Psychological support (n=7): divided into self-guidance and professional guidance. Self-guided psychological support is realized by the corresponding modules of intervention independently completed by breast cancer patients. Professionally guided psychological support is conducted through e-mail interaction with the therapists or online interaction with groups of other breast cancer patients. It includes negative emotional self-assessment or monitoring, cognitive behavioral therapy, mindfulness training, expressive writing to alleviate physical image distress, psychological education, cognitive behavioral therapy, reflective diary, meditation training, etc. (5) Communication with health professionals via mail/web (n=28): The main form is that breast cancer patients directly contact with health professionals and ask questions, health professionals give advice or emotional support to breast cancer patients. (6) Peer support (n=20): Support information and rehabilitation experience sharing are mainly provided by other breast cancer patients.

Intervention providers were mainly nurses or physicians, a few multidisciplinary teams brought together by physicians, nurses, dietitians, rehabilitators, psychotherapists, and information engineers. In terms of intervention sample size, due to the study conditions, most of the interventions were conducted in small

1  
2  
3  
4 samples, with single-group sample sizes mostly concentrated in 30-60 individuals, and only six studies with  
5  
6 sample sizes of 61-100, and only seven studies with sample sizes of more than 100, while only three studies  
7  
8 with sample sizes of less than 30.

9  
10 On the basis of intervention duration, the majority of the 26 intervention studies focusing on the  
11  
12 chemotherapy phase of breast cancer conducted four to six chemotherapy cycles, and the intervention  
13  
14 duration was mostly three to six months; only two studies lasted nine months, while the intervention  
15  
16 duration in the other five studies ranged from two weeks to six weeks, and four studies did not explicitly  
17  
18 report the duration of the intervention (Foley).

19  
20 With reference to intervention content, Internet-based support interventions included evidence-based  
21  
22 health education messages, symptom self-monitoring/tracking and management, self-management skills  
23  
24 training (healthy lifestyle management), journal writing or sharing, question-and-answer counseling by  
25  
26 professionals, establishing channels of communication with peers, sharing videos of role models' journeys,  
27  
28 relaxation training, psychoeducation, and cognitive-behavioral therapy.

### 31 **Interventions and associated outcomes**

32  
33 In this systematic review, the Internet-based support interventions were evaluated for their effectiveness on  
34  
35 Quality of life, anxiety and/or depression, psychological distress, physical variables, social support, and  
36  
37 self-efficacy.

#### 40 **Quality of life**

41  
42 Eighteen studies reported on Quality of life with significant positive intervention effects reported by  
43  
44 seventeen. In seven RCTs and four quasi-experimental studies conducted in China, the Quality of life score  
45  
46 of the intervention group was higher than that of the control group<sup>36, 37, 40-48</sup>. A web-based tailored  
47  
48 psychoeducational intervention for breast cancer patients who completed curative-intent primary treatment  
49  
50 reported that improvements in distress, distress-related problems and Quality of life were observed in both  
51  
52 study groups but no significant differences<sup>49</sup>.

#### 55 **Symptoms of anxiety and/or depression**

56  
57  
58 Eleven studies found inconsistent results regarding the impact of the Internet-based Support Interventions on  
59  
60 symptoms of anxiety and/or depression. The results of three RCTs and one quasi-experimental study in

1  
2  
3  
4 China included in this review showed that Internet-based support interventions significantly improved  
5 quality of life, anxiety and depression in breast cancer patients<sup>37 43, 47, 48</sup>. In the other three RCTs, the patients  
6 reported the lower scores of anxiety or depression than control group ( $P < 0.05$ )<sup>50-52</sup>. The limitations of  
7  
8 other studies may explain the insignificant effects of the intervention, such as short follow-up time<sup>53, 54</sup>,  
9  
10 underrepresentation of the research subjects<sup>55</sup>, that is, the lack of human-computer interaction in the  
11  
12 system<sup>30</sup>, the relatively normal degree of anxiety, depression, and psychological distress.  
13  
14  
15  
16  
17

### 18 **Psychological distress**

19  
20 Five studies reported inconsistent results concerning the effectiveness of Internet-based support  
21 interventions on psychological distress. In an RCT study of online expressive writing focused on  
22 self-compassion, participants in the intervention group reported significantly less body image-related  
23 distress and greater body appreciation than only expressive writing participants in the control group<sup>50</sup>. In one  
24 pretest-posttest design, which findings supported the positive effects of the Internet Cancer Support Group  
25 on psychological symptoms<sup>38</sup>. In the other three RCT concerning psychological education and group  
26 medical consultation, patients in the intervention group reported lower scores of psychological distress than  
27 the control group, but this difference was not significant<sup>31 49 34</sup>.  
28  
29  
30  
31  
32  
33  
34  
35  
36  
37

### 38 **Physical variables/symptoms**

39  
40 Fifteen studies reported on physical symptoms, including physical symptom distress, physical symptom  
41 severity, and prevalence or number of symptoms. All except one<sup>40</sup> which was conducted in China  
42 showed positive significant intervention effects. In four non-randomized studies and three RCT studies  
43 conducted in China, patients in the intervention group reported significantly improved symptoms of  
44 lymphedema<sup>56</sup>, body image distress<sup>46</sup>, fatigue symptoms<sup>47 57</sup>, nausea and vomiting and other  
45 gastrointestinal discomfort symptoms<sup>32, 44 57</sup>, and postoperative complications<sup>42</sup>. In the other six studies,  
46  
47 three of them are RCTs<sup>36 58 59</sup>, one is pilot RCT<sup>60</sup>, and the other two are randomized pretest-posttest  
48  
49 designs<sup>38, 39</sup>, symptom distress was significantly lower in the intervention group, and there was a trend  
50  
51 toward lower symptom severity and symptom prevalence. In an RCT study in Sweden, an interactive  
52  
53 application-based symptom management intervention significantly reduced the prevalence of nausea,  
54  
55 vomiting, feeling sad, loss of appetite, and constipation during neoadjuvant chemotherapy<sup>61</sup>.  
56  
57  
58  
59  
60

## Social support

Two studies showed that the online interventions did not significantly improve patients' social support. In one RCT, Internet-based support intervention did not significantly change social support relative to the effect of usual care alone at 3 months<sup>36</sup>. However, the longer women used the Internet-based support program, the higher women perceived social support. One study focused on online support groups did not significantly improve patient perceived social support, which effectiveness appeared influenced by other factors, such as background and disease<sup>38</sup>.

## Self-efficacy

Self-efficacy was reported in six studies, of which three studies had significant positive intervention effects on it. In three RCTs conducted in China, concerning a breast cancer e-support program<sup>36</sup>, a full-process information management system for breast cancer patients based on clinical decision support<sup>62</sup> and follow-up of innovative approaches based on WeChat platform<sup>63</sup>, the intervention groups reported improved self-efficacy than control groups. In the other three RCTs, regarding a web-based expert support self-management program<sup>33</sup>, a computer-based educational program<sup>30</sup>, and the Internet Cancer Support Group<sup>38</sup>, participants in the two groups showed no significant differences in self-efficacy.

## DISCUSSION

This review examines the effectiveness of Internet-based support interventions for various health outcomes in patients with breast cancer. Due to the rapid growth of online interventions in this group in recent years, this review focuses on studies published over the past five years. A total of 35 studies were identified.

In the research field of supporting and caring for breast cancer, the content elements of Internet intervention include information support, symptom management, behavior management, psychological support, contact with medical staff and peer support. In some studies, information support or psychological support is provided to breast cancer patients only through Internet intervention<sup>50, 52, 53</sup>. However, in addition to providing information support or psychological support, most studies also provide comprehensive interventions such as symptom management, peer support and interaction with

1  
2  
3  
4 medical staff. Breast cancer patients believe peer support is more useful in interacting with  
5 professionals than simply providing care information or psychological support<sup>31, 47</sup>. In addition, some  
6 studies based on evidence-based self-help intelligent information technology system can provide  
7 personalized customized information for patients, reduce the information burden unrelated to specific  
8 diagnosis or cancer stage, and to some extent solve the information limitation caused by the imbalance  
9 of health resources in various regions<sup>31, 44, 47, 49, 54, 55, 61, 62</sup>. In the future, it is necessary to organize  
10 multidisciplinary teams to develop elements and programs for personalized assessment and  
11 comprehensive intervention of Internet support interventions, and to involve breast cancer patients  
12 from end users in the process of intervention research and development. Based on the current  
13 situation of uneven resources of experts in various regions, the research and development of intelligent  
14 decision-making system can be explored to realize the customization and recommendation of  
15 personalized schemes.  
16  
17  
18  
19  
20  
21  
22  
23  
24  
25  
26

27 The optimal duration of Internet-based support interventions remains to be explored. The limited  
28 duration of follow-up for Internet-based interventions hinders the long-term effects of such  
29 Internet-based support interventions. Most of the studies included in this review were followed up for  
30 no more than 6 months, and only 5 studies were followed up for 9, 12 or 18 months<sup>30, 46, 57, 59, 63</sup>. In  
31 current and future studies, there is a need to extend the periodicity and follow-up of the Internet support  
32 intervention to explore whether this intervention has long-term benefits for breast cancer. In addition,  
33 the charging and sustainability of the Internet support platform should be considered in the integration  
34 into the daily care of patients and needs to be further explored.  
35  
36  
37  
38  
39  
40  
41

42 Quality of life is a major prognostic indicator for breast cancer patients, as diagnosis and treatment  
43 often result in significantly impaired quality of life<sup>4</sup>. Modern oncology disciplines unanimously believe  
44 that the quality of life of cancer patients is more representative of the cure effect and recovery status of  
45 the patient than the survival period and mortality rate<sup>64</sup>. Overall, Internet-based support interventions  
46 can improve the quality of life of breast cancer patients. Only one study does not support this view.  
47 On the one hand, the reason may be that the intervention content of this study is unitary, and only  
48 psychological and information intervention is carried out. The measurement standard of quality of life  
49 includes many aspects such as physiology, psychology and society, and is affected by many factors.  
50 On the other hand, affected by the differences in ethnic culture, people in different regions will have  
51 differences even if they use the same measurement scale.  
52  
53  
54  
55  
56  
57  
58  
59  
60

1  
2  
3  
4 The National Comprehensive Cancer Network (NCCN)<sup>65</sup> currently defines " psychological  
5 distress" as an unpleasant emotional experience of psychological, social, and/or spiritual nature  
6 caused by multiple factors, which can further aggravate physical symptoms, impact treatment  
7 compliance and quality of life. The negative emotions of cancer patients are affected by many factors,  
8 such as disease cognition, social support and physiological status. The results of this review show that  
9 the effect of Internet-based support intervention on reducing negative emotions of breast cancer  
10 patients is still controversial. It is suggested that future research needs to further analyze the promotion  
11 and obstacle factors of Internet psychological support intervention, and explore improvement strategies  
12 to better implement and promote network intervention<sup>30, 34, 53</sup>.

13  
14  
15  
16  
17  
18  
19  
20  
21 This review included 15 studies that reported indicators related to physical symptoms. Eight  
22 studies focused on the alleviation of physical symptoms in breast cancer patients, and the other seven  
23 studies focused on the severity of physical symptoms in patients. Few studies focused on the changes  
24 of other measurement indicators, such as the prevalence or number of physical symptoms. Indeed, the  
25 goal of symptom management is not necessarily to prevent symptoms, but to reduce their severity and  
26 impact on psychological distress and quality of life. Kearney et al<sup>66</sup> reported that monitoring and  
27 reporting of symptoms may also manifest as an increase in symptom severity depending on the time of  
28 assessment or patient self-report, better reflecting actual symptom burden and providing a clearer target  
29 for intervention.

30  
31  
32  
33  
34  
35  
36  
37  
38  
39 Lack of social support for patients with chronic diseases including breast cancer is associated with  
40 poor emotional health, increased depressive symptoms and poor quality of life<sup>67</sup>. Besides, studies also  
41 have shown that improving self-efficacy can promote behavior change, improve self-management  
42 ability, quality of life, and confidence in coping with illness<sup>68</sup>. Although social support and  
43 self-efficacy are important factors influencing the quality of life of breast cancer patients, this review  
44 found that there are limited studies evaluating the impact of Internet-based support interventions on  
45 these two outcomes. Although social support and self-efficacy are important factors affecting the  
46 quality of life of breast cancer patients, this review found that the effect of Internet-based support  
47 intervention on these two measurement indicators is still controversial, which needs further discussion  
48 in future research.

## 49 50 51 52 53 54 55 56 57 58 59 60 **Limitations**



1  
2  
3  
4 First, due to language restrictions, only published literature in Chinese and English from this review.  
5  
6 Second, this review focused on only six health outcomes to test the effectiveness of Internet-based  
7  
8 interventions; therefore, the amount of literature selected may have been reduced. To obtain a more  
9  
10 comprehensive picture, future reviews could include other health outcomes such as supportive care  
11  
12 needs, satisfaction with cancer treatment, and decisional conflict/pain. Again, the heterogeneity of the  
13  
14 included studies in terms of sample and methodology, the different age and tumor stages of the study  
15  
16 population, the differences in the content, modality, frequency, and duration of the interventions  
17  
18 adopted by the studies, and the different measurement tools for the same outcome indicators did not  
19  
20 lend themselves to a combined study; therefore, this review is only a descriptive study of the findings.  
21  
22 Finally, some of the studies included in this review had small sample sizes<sup>51, 53, 60</sup>. The insignificant  
23  
24 impact may be due to a lack of statistical power rather than a true intervention nullification.  
25  
26

## 27 **Conclusion**

28  
29 The results of this review suggest that Internet-based support intervention can have a positive effect on  
30  
31 patients with breast cancer, and can effectively improve the quality of life of patients. However, the  
32  
33 effect of Internet-based support intervention on patients' physical symptoms, social support,  
34  
35 self-efficacy, anxiety, depression and other negative emotions is still controversial, which is worthy of  
36  
37 further discussion in future intervention studies. In the future, it is necessary to standardize  
38  
39 Internet-based support interventions (content, form, frequency, duration), formulate a unified  
40  
41 evaluation index system, design larger sample, multi-center randomized controlled trials, and further  
42  
43 explore the long-term intervention effect of Internet-based support nursing on breast cancer patients.  
44  
45 Medical professionals can combine the existing or new Internet-based interventions with the clinical  
46  
47 nursing path of breast cancer patients and their daily life self-management to improve the quality of life  
48  
49 among breast cancer patients. With the participation of multidisciplinary teams and breast cancer  
50  
51 patients, the research and development of intelligent decision-making system is explored to realize the  
52  
53 customization and recommendation of personalized intervention programs.  
54  
55

56 **Acknowledgements** We thank breast cancer patients and health professionals' involvement and their  
57  
58 input on the study design.  
59  
60

1  
2  
3  
4 **Contributors** Yw H& Qq L: study design, data collection and analysis, drafting and revising the  
5 manuscript. FZ: supervision of study design, data collection and analysis, revising the manuscript. Jy S:  
6 supervision of study design, data collection and analysis, revising the manuscript.  
7  
8

9 **Funding** This study is supported by The Natural Science Foundation of the Jiangsu Higher Education  
10 Institutions of China, No. 18KJA320013.  
11

12 **Competing interests** None declared.  
13

14 **Patient consent for publication** Not required.  
15

16 **Ethics approval statement** Not required.  
17

18 **Provenance and peer review** Not commissioned; externally peer reviewed.  
19

20 **Data Availability Statements** Data sharing not applicable to this article as no datasets were  
21 generated or analyzed during the current study.  
22  
23

24 **Open access** This is an open access article distributed in accordance with the Creative Commons  
25 Attribution Non Commercial (CC BY-NC 4.0) license, which permits others to distribute, remix, adapt,  
26 build upon this work non-commercially, and license their derivative works on different terms, provided  
27 the original work is properly cited, appropriate credit is given, any changes made indicated, and the use  
28 is non-commercial. See: <http://creativecommons.org/licenses/by-nc/4.0/>.  
29  
30  
31  
32  
33  
34  
35  
36  
37  
38  
39  
40  
41  
42  
43  
44  
45  
46  
47  
48  
49  
50  
51  
52  
53  
54  
55  
56  
57  
58  
59  
60

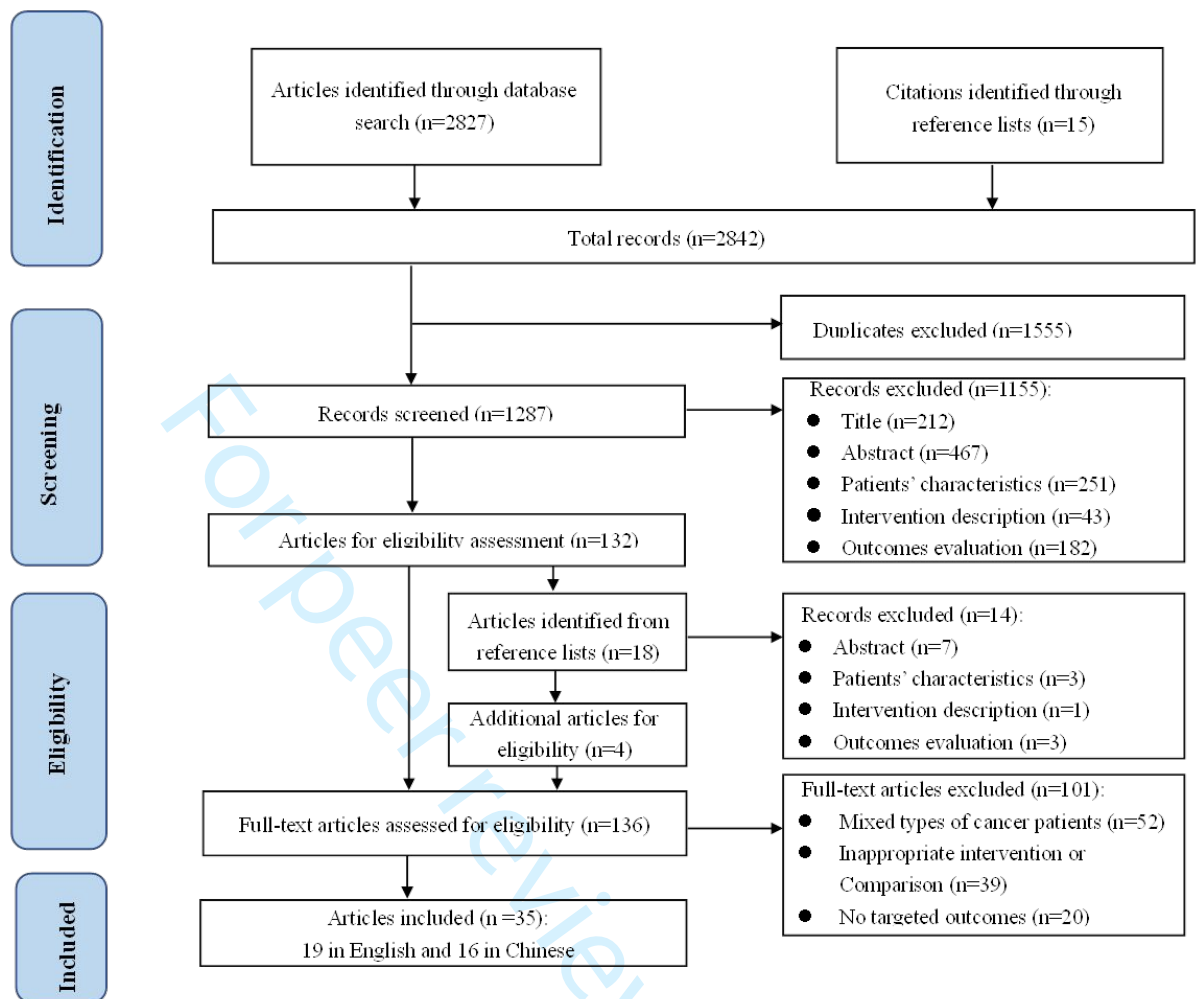

**Fig. 1 Flowchart of Search and Selection Process**

**Table 1 Risk of Bias Assessment Tool for RCTs**

| References                  | Item 1 | Item 2 | Item 3 | Item 4 | Item 5 | Item 6 | Item 7 | Quality grade |
|-----------------------------|--------|--------|--------|--------|--------|--------|--------|---------------|
| Im,2020 <sup>39</sup>       | +      | ?      | ?      | +      | +      | +      | +      | B             |
| Zhou,2019 <sup>37</sup>     | +      | ?      | +      | +      | +      | +      | +      | B             |
| Visser,2018 <sup>34</sup>   | ?      | ?      | -      | -      | +      | +      | +      | C             |
| Zhou,2020 <sup>40</sup>     | +      | +      | +      | ?      | +      | +      | +      | B             |
| Rosen,2018 <sup>35</sup>    | +      | -      | -      | -      | +      | +      | +      | B             |
| Foley,2016 <sup>53</sup>    | +      | ?      | ?      | ?      | +      | +      | +      | B             |
| Sherman,2018 <sup>50</sup>  | +      | ?      | ?      | ?      | +      | +      | +      | B             |
| Lally,2020 <sup>31</sup>    | +      | ?      | ?      | ?      | +      | +      | +      | B             |
| Ventura,2017 <sup>30</sup>  | +      | +      | ?      | ?      | +      | +      | +      | B             |
| Admiraal,2017 <sup>49</sup> | +      | +      | -      | -      | +      | +      | +      | B             |
| Korkmaz,2020 <sup>52</sup>  | +      | ?      | ?      | ?      | +      | +      | +      | B             |
| Hou,2020 <sup>69</sup>      | +      | +      | +      | +      | +      | +      | +      | A             |
| Fjell,2020 <sup>61</sup>    | +      | +      | ?      | ?      | +      | +      | +      | B             |
| Villani,2018 <sup>51</sup>  | ?      | ?      | ?      | ?      | +      | +      | +      | C             |
| White,2018 <sup>55</sup>    | +      | ?      | ?      | ?      | +      | +      | +      | B             |
| Zhu,2018 <sup>36</sup>      | +      | +      | ?      | +      | +      | +      | +      | B             |
| Wheelock,2015 <sup>59</sup> | +      | ?      | ?      | ?      | +      | +      | +      | B             |
| Graetz,2018 <sup>60</sup>   | +      | +      | ?      | ?      | +      | +      | +      | B             |
| Egbring,2016 <sup>58</sup>  | +      | +      | ?      | ?      | +      | +      | +      | B             |
| Chee,2016 <sup>38</sup>     | +      | ?      | ?      | +      | +      | +      | +      | B             |
| Handa,2020 <sup>54</sup>    | +      | ?      | ?      | ?      | +      | +      | +      | B             |
| Wang,2017 <sup>43</sup>     | +      | ?      | ?      | ?      | +      | +      | +      | B             |
| Wang,2019 <sup>57</sup>     | ?      | ?      | ?      | ?      | +      | +      | +      | C             |
| Kim,2020 <sup>33</sup>      | +      | ?      | ?      | ?      | +      | +      | +      | B             |

1  
2  
3  
4  
5  
6  
7  
8  
9  
10  
11  
12  
13  
14  
15  
16  
17  
18  
19  
20  
21  
22  
23  
24  
25  
26  
27  
28  
29  
30  
31  
32  
33  
34  
35  
36  
37  
38  
39  
40  
41  
42  
43  
44  
45  
46

**Table 1 Risk of Bias Assessment Tool for RCTs**

| References              | Item 1 | Item 2 | Item 3 | Item 4 | Item 5 | Item 6 | Item 7 | Quality grade |
|-------------------------|--------|--------|--------|--------|--------|--------|--------|---------------|
| Chen,2015 <sup>48</sup> | +      | ?      | ?      | ?      | +      | +      | +      | B             |
| Peng,2020 <sup>46</sup> | ?      | ?      | ?      | ?      | +      | +      | +      | C             |
| Wang,2019 <sup>45</sup> | +      | ?      | ?      | ?      | +      | +      | +      | B             |
| Li,2018 <sup>44</sup>   | ?      | ?      | ?      | ?      | +      | +      | +      | C             |
| Liu,2019 <sup>63</sup>  | ?      | ?      | ?      | ?      | +      | +      | +      | C             |
| Du,2021 <sup>62</sup>   | +      | ?      | ?      | ?      | +      | +      | +      | B             |

Key: “+” =low risk of bias; “-” –high risk of bias; “?” – unclear risk of bias. Item 1: Random sequence generation; Item 2: Allocation concealment; Item3: Blinding of participants and personnel; Item 4: Blinding of outcome assessment; Item 5: Incomplete outcome data; Item 6: Selective outcome; Item 7: Other sources of bias

**Table 2 Risk of Bias Assessment Tool for quasi-experimental studies**

| References              | Item 1 | Item 2 | Item 3 | Item 4 | Item 5 | Item 6 | Item 7 | Item 8 | Item 9 | Quality grade |
|-------------------------|--------|--------|--------|--------|--------|--------|--------|--------|--------|---------------|
| Yue,2020 <sup>56</sup>  | Y      | Y      | N      | Y      | Y      | N      | Y      | CT     | Y      | B             |
| Zhou,2019 <sup>41</sup> | Y      | CT     | Y      | Y      | Y      | N      | CT     | CT     | Y      | B             |
| Xu,2017 <sup>42</sup>   | Y      | Y      | Y      | Y      | Y      | Y      | CT     | CT     | Y      | B             |
| Dai,2017 <sup>32</sup>  | Y      | CT     | CT     | Y      | Y      | Y      | CT     | CT     | Y      | B             |
| Li,2017 <sup>47</sup>   | Y      | CT     | CT     | Y      | Y      | Y      | CT     | CT     | Y      | B             |

Key: Y=yes, N=no, CT=cannot tell. Item 1: Was the causal relationship in the study clearly stated? Item 2: Was the baseline comparable between the groups? Item 3: Were the other measures received by the groups the same, except for the intervention to be validated? Item 4: Was a control group established? Item 5: Were multidimensional measures of outcome indicators performed before and after the intervention? Item 6: Was follow-up complete, and if not, were missing visits reported and measures taken to address them? Item 7: Were the outcome indicators measured in the same way for all study groups? Item 8: Were the measures of outcome indicators reliable? Item 9: Were the data analysis methods appropriate?

**Table 3** Data abstraction of the included studies

| Author/year                          | Country | Study Design | Size(I/C) | Intervention group |                  |                            | Control                  | Duration | Outcome indicators of interest |
|--------------------------------------|---------|--------------|-----------|--------------------|------------------|----------------------------|--------------------------|----------|--------------------------------|
|                                      |         |              |           | Delivery           | Content elements | personalized customization |                          |          |                                |
| Im, et al <sup>39</sup><br>2020      | USA     | RCT          | 49/66     | Web                | ①⑤⑥              | No                         | CAU                      | 3 months | C                              |
| Zhou, et al <sup>37</sup><br>2019    | CHN     | RCT          | 66/66     | WeChat             | ①⑤⑥              | No                         | CAU                      | 12 weeks | B                              |
| Visser, et al <sup>34</sup><br>2018  | NL      | RCT          | 50/59     | APP                | ①⑤⑥              | No                         | CAU                      | 3 months | C                              |
| Zhou, et al <sup>40</sup><br>2020    | CHN     | RCT          | 55/56     | WeChat             | ①⑤⑥              | No                         | CAU                      | 6 months | AD                             |
| Rosen, et al <sup>35</sup><br>2018   | USA     | RCT          | 55/57     | APP                | ①④               | No                         | Waiting list             | 8 weeks  | A                              |
| Foley, et al <sup>53</sup><br>2016   | IRL     | RCT          | 26/13     | APP                | ①                | Yes                        | CAU                      | 1 weeks  | B                              |
| Sherman, et al <sup>50</sup><br>2018 | AUS     | RCT          | 155/149   | Web                | ④                | No                         | Expressive writing + CAU | NA       | BC                             |
| Ventura, et al <sup>30</sup><br>2017 | SE      | RCT          | 121/105   | Support system     | ①⑤               | No                         | CAU                      | 9 months | BE                             |
| Lally, et al <sup>31</sup><br>2020   | USA     | RCT          | 43/57     | Web                | ①④⑥              | Yes                        | CAU                      | 12 weeks | C                              |

1  
2  
3  
4  
5  
6  
7  
8  
9  
10  
11  
12  
13  
14  
15  
16  
17  
18  
19  
20  
21  
22  
23  
24  
25  
26  
27  
28  
29  
30  
31  
32  
33  
34  
35  
36  
37  
38  
39  
40  
41  
42  
43  
44  
45  
46

**Table 3 Data abstraction of the included studies**

| Author/year                           | Country | Study Design | Size(I/C) | Intervention group |                  |                            | Control                                       | Duration  | Outcome indicators of interest |
|---------------------------------------|---------|--------------|-----------|--------------------|------------------|----------------------------|-----------------------------------------------|-----------|--------------------------------|
|                                       |         |              |           | Delivery           | Content elements | personalized customization |                                               |           |                                |
| Admiraal, et al <sup>49</sup><br>2017 | NL      | RCT          | 69/69     | Web                | ①④               | Yes                        | CAU                                           | 12 weeks  | AC                             |
| Korkmaz, et al <sup>52</sup><br>2020  | TR      | 3-arm RCT    | 24/24/24  | Web                | ①                | No                         | brochure education /CAU                       | 1 month   | AB                             |
| Hou, et al <sup>69</sup><br>2020      | TW      | RCT          | 59/53     | APP                | ①②③④⑤⑥           | No                         | CAU                                           | 3 months  | A                              |
| Fjell, et al <sup>61</sup><br>2020    | SE      | RCT          | 75/74     | APP                | ①②⑤              | Yes                        | CAU                                           | 2 weeks   | AD                             |
| Villani, et al <sup>51</sup><br>2018  | Ita     | RCT          | 14/15     | Web                | ④⑤⑥              | No                         | CAU                                           | 3 months  | B                              |
| White, et al <sup>55</sup><br>2018    | AUS     | RCT          | 177/202   | Web                | ①④               | Yes                        | CAU                                           | 6 months  | AB                             |
| Zhu, et al <sup>36</sup><br>2018      | CHN     | RCT          | 57/57     | APP                | ①⑤⑥              | No                         | CAU                                           | 3 months  | ADEF                           |
| Wheelock, et al <sup>59</sup><br>2015 | USA     | RCT          | 41/59     | Support system     | ①②⑤              | No                         | CAU                                           | 18 months | D                              |
| Graetz, et al <sup>60</sup> 2018      | USA     | RCT          | 25/23     | APP                | ②⑤               | Yes                        | App (no reminders)                            | 8 weeks   | D                              |
| Egbring, et al <sup>58</sup> 2016     | Swit    | RCT          | 44/46/49  | APP                | ①②⑤              | No                         | CAU/ App (No reviewed data with a physician.) | 42 days   | D                              |

**Table 3** Data abstraction of the included studies

| Author/year                     | Country | Study Design           | Size(I/C) | Intervention group |                  |                            | Control            | Duration  | Outcome indicators of interest |
|---------------------------------|---------|------------------------|-----------|--------------------|------------------|----------------------------|--------------------|-----------|--------------------------------|
|                                 |         |                        |           | Delivery           | Content elements | personalized customization |                    |           |                                |
| Chee, et al <sup>38</sup> 2016  | USA     | RCT                    | 30/35     | Web                | ①⑤⑥              | No                         | CAU                | 1 month   | ACDEF                          |
| Kim, et al <sup>33</sup> 2020   | KP      | RCT                    | 30/30     | APP                | ①③⑤              | No                         | CAU                | 6 months  | F                              |
| Handa, et al <sup>54</sup> 2020 | JPN     | RCT                    | 52/50     | APP                | ①②⑤              | Yes                        | brochure education | 12 weeks  | B                              |
| Wang, et al <sup>43</sup> 2017  | CHN     | RCT                    | 318/320   | APP                | ①⑤⑥              | No                         | CAU                | 2 weeks   | AB                             |
| Wang, et al <sup>57</sup> 2019  | CHN     | RCT                    | 74/75     | WeChat             | ①⑤⑥              | No                         | CAU                | 9 months  | D                              |
| Chen, et al <sup>48</sup> 2015  | CHN     | RCT                    | 45/45     | Web                | ①⑤⑥              | No                         | CAU                | 3 months  | AB                             |
| Peng, et al <sup>46</sup> 2020  | CHN     | RCT                    | 58/59     | WeChat             | ①⑤⑥              | No                         | CAU                | 12 months | AC                             |
| Wang, et al <sup>45</sup> 2019  | CHN     | RCT                    | 44/44     | WeChat             | ①⑤⑥              | No                         | CAU                | 6 months  | AD                             |
| Li, et al <sup>44</sup> 2018    | CHN     | RCT                    | 60/60     | APP                | ①②⑤              | Yes                        | CAU                | 2 weeks   | AD                             |
| Liu, et al <sup>63</sup> 2019   | CHN     | RCT                    | 50/50     | WeChat             | ①⑤⑥              | No                         | CAU                | 12 months | F                              |
| Du, et al <sup>62</sup> 2021    | CHN     | RCT                    | 40/40     | Support system     | ①②⑤              | Yes                        | tel                | 6 months  | F                              |
| Yue, et al <sup>56</sup> 2020   | CHN     | Quasi-experiment study | 146/148   | WeChat             | ①⑤⑥              | No                         | CAU                | 12 months | D                              |



1  
2  
3  
4  
5  
6  
7  
8  
9  
10  
11  
12  
13  
14  
15  
16  
17  
18  
19  
20  
21  
22  
23  
24  
25  
26  
27  
28  
29  
30  
31  
32  
33  
34  
35  
36  
37  
38  
39  
40  
41  
42  
43  
44  
45  
46

**Table 3 Data abstraction of the included studies**

| Author/year                       | Country | Study Design           | Size(I/C) | Intervention group |                  |                            | Control                                      | Duration | Outcome indicators of interest |
|-----------------------------------|---------|------------------------|-----------|--------------------|------------------|----------------------------|----------------------------------------------|----------|--------------------------------|
|                                   |         |                        |           | Delivery           | Content elements | personalized customization |                                              |          |                                |
| Zhou, et al <sup>41</sup><br>2019 | CHN     | Quasi-experiment study | 145/153   | WeChat             | ①⑤⑥              | No                         | CAU                                          | 6 months | A                              |
| Xu, et al <sup>42</sup><br>2017   | CHN     | Quasi-experiment study | 75/75     | APP +WeChat        | ①②⑤              | No                         | CAU                                          | 2 months | AD                             |
| Dai, et al <sup>32</sup><br>2017  | CHN     | Quasi-experiment study | 42/47     | WeChat             | ①⑤⑥              | No                         | Extended care ( telephone + home follow-up ) | 6 months | AD                             |
| Li, et al <sup>47</sup><br>2017   | CHN     | Quasi-experiment study | 58/48     | WeChat             | ①③⑤⑥             | Yes                        | CAU                                          | 4 weeks  | ABD                            |

**Abbreviations:** ①Information support; ②Symptom management; ③Behavior management; ④Psychological support; ⑤Communication with health professionals via mail/web; ⑥Peer support; CHN, china; USA, the United States of America; NL, Netherlands; IRL, Ireland; AUS, Australia; SE, *Sweden*; TR, Turkey; TW, Taiwan; Ita, *Italy*; Swit, Switzerland; KP, North Korea ; JPN: japan; Web: website; APP: Application on the smart phone; CAU, Care As Usual; C, Control group; I, Intervention group; NA: Not Available; RCT, randomized control trial **Outcome indicator:** A, quality of life; B, Anxiety and depression; C, Psychological distress; D, Physical variables; E, Social support; F ,Self-efficacy

## REFERENCES

1. Siegel RL, Miller KD and Jemal A. Cancer Statistics, 2017. *CA: a cancer journal for clinicians* 2017; 67: 7-30. 2017/01/06. DOI: 10.3322/caac.21387.
2. Sung H, Ferlay J, Siegel RL, et al. Global Cancer Statistics 2020: GLOBOCAN Estimates of Incidence and Mortality Worldwide for 36 Cancers in 185 Countries. *CA: a cancer journal for clinicians* 2021; 71: 209-249. 2021/02/05. DOI: 10.3322/caac.21660.
3. Desantis CE, Ma J, Gaudet MM, et al. Breast cancer statistics, 2019. *CA: a cancer journal for clinicians* 2019; 69.
4. Khan F, Amatya B, Pallant JF, et al. Factors associated with long-term functional outcomes and psychological sequelae in women after breast cancer. *Breast* 2012; 21: 314-320. 2012/02/22. DOI: 10.1016/j.breast.2012.01.013.
5. Mehnert A and Koch U. Prevalence of acute and post-traumatic stress disorder and comorbid mental disorders in breast cancer patients during primary cancer care: a prospective study. *Psycho-oncology* 2007; 16: 181-188. 2006/07/21. DOI: 10.1002/pon.1057.
6. Gorini A, Mazzocco K, Gandini S, et al. Development and psychometric testing of a breast cancer patient-profiling questionnaire. *Breast cancer (Dove Medical Press)* 2015; 7: 133-146. 2015/06/13. DOI: 10.2147/bctt.s80014.
7. Bouma G, Admiraal JM, de Vries EG, et al. Internet-based support programs to alleviate psychosocial and physical symptoms in cancer patients: a literature analysis. *Critical reviews in oncology/hematology* 2015; 95: 26-37. 2015/02/24. DOI: 10.1016/j.critrevonc.2015.01.011.
8. Fiszer C, Dolbeault S, Sultan S, et al. Prevalence, intensity, and predictors of the supportive care needs of women diagnosed with breast cancer: a systematic review. *Psycho-oncology* 2014; 23: 361-374. 2014/03/29. DOI: 10.1002/pon.3432.
9. Smith A, Hyde YM and Stanford D. Supportive care needs of cancer patients: A literature review. *Palliative & supportive care* 2015; 13: 1013-1017. 2014/08/16. DOI: 10.1017/s1478951514000959.
10. Lou Y, Yates P, McCarthy A, et al. Fatigue self-management: a survey of Chinese cancer patients undergoing chemotherapy. *Journal of clinical nursing* 2013; 22: 1053-1065. 2013/03/14. DOI: 10.1111/jocn.12174.
11. Chen YY, Guan BS, Li ZK, et al. Effect of telehealth intervention on breast cancer patients' quality of life and psychological outcomes: A meta-analysis. *J Telemed Telecare* 2018; 24: 157-167. 2017/01/14. DOI: 10.1177/1357633x16686777.
12. Alanee S, Dynda D, LeVault K, et al. Delivering kidney cancer care in rural Central and Southern Illinois: a telemedicine approach. *European journal of cancer care* 2014; 23: 739-744. 2014/10/08. DOI: 10.1111/ecc.12248.
13. Schinkthe T. Individualized eHealth Support for Oncological Therapy Management. *Breast Care* 2019; 14: 1-5.
14. Aaronson NK, Mattioli V, Minton O, et al. Beyond treatment - Psychosocial and behavioural issues in cancer survivorship research and practice. *EJC supplements : EJC : official journal of EORTC, European Organization for Research and Treatment of Cancer [et al]* 2014; 12: 54-64. 2015/07/29. DOI: 10.1016/j.ejcsup.2014.03.005.

- 1  
2  
3  
4  
5 15. Janssen A and Brunner M. Interdisciplinary eHealth Practice in Cancer Care: A Review of the Literature. 2017; 14. DOI: 10.3390/ijerph14111289.
- 6 16. Jansen F, van Uden-Kraan CF, van Zwieten V, et al. Cancer survivors' perceived need for supportive care and their attitude towards self-management and eHealth.  
7 *Supportive care in cancer : official journal of the Multinational Association of Supportive Care in Cancer* 2015; 23: 1679-1688. 2014/11/27. DOI:  
8 10.1007/s00520-014-2514-7.  
9
- 10 17. van de Poll-Franse LV and van Eenbergen MC. Internet use by cancer survivors: current use and future wishes. *Supportive care in cancer : official journal of the*  
11 *Multinational Association of Supportive Care in Cancer* 2008; 16: 1189-1195. 2008/02/23. DOI: 10.1007/s00520-008-0419-z.
- 12 18. Cruz F, Vilela RA, Ferreira EB, et al. Evidence on the Use of Mobile Apps During the Treatment of Breast Cancer: Systematic Review. *JMIR Mhealth Uhealth* 2019; 7:  
13 e13245. 2019/08/29. DOI: 10.2196/13245.
- 14 19. Fridriksdottir N, Gunnarsdottir S, Zoëga S, et al. Effects of web-based interventions on cancer patients' symptoms: review of randomized trials. *Supportive care in*  
15 *cancer : official journal of the Multinational Association of Supportive Care in Cancer* 2018; 26: 337-351. 2017/09/19. DOI: 10.1007/s00520-017-3882-6.
- 16 20. Steel JL, Geller DA, Kim KH, et al. Web-based collaborative care intervention to manage cancer-related symptoms in the palliative care setting. *Cancer* 2016; 122:  
17 1270-1282. 2016/03/13. DOI: 10.1002/cncr.29906.
- 18 21. van den Berg SW, Gielissen MF, Custers JA, et al. BREATH: Web-Based Self-Management for Psychological Adjustment After Primary Breast Cancer--Results of a  
19 Multicenter Randomized Controlled Trial. *Journal of clinical oncology : official journal of the American Society of Clinical Oncology* 2015; 33: 2763-2771. 2015/07/15.  
20 DOI: 10.1200/jco.2013.54.9386.
- 21 22. Zhu J, Ebert L and Wai-Chi Chan S. Integrative Review on the Effectiveness of Internet-Based Interactive Programs for Women With Breast Cancer Undergoing  
22 Treatment. *Oncol Nurs Forum* 2017; 44: E42-e54. 2017/02/22. DOI: 10.1188/17.onf.e42-e54.
- 23 23. Cruz F, Vilela RA, Ferreira EB, et al. Evidence on the Use of Mobile Apps During the Treatment of Breast Cancer: Systematic Review. *Jmir Mhealth and Uhealth*  
24 2019; 7. DOI: 10.2196/13245.
- 25 24. Willems RA, Bolman CA, Mesters I, et al. Short-term effectiveness of a web-based tailored intervention for cancer survivors on quality of life, anxiety, depression, and  
26 fatigue: randomized controlled trial. *Psycho-oncology* 2017; 26: 222-230. 2016/03/19. DOI: 10.1002/pon.4113.
- 27 25. Fang SY, Wang YL, Lu WH, et al. Long-term effectiveness of an E-based survivorship care plan for breast cancer survivors: A quasi-experimental study. *Patient Educ*  
28 *Couns* 2020; 103: 549-555. 2019/09/29. DOI: 10.1016/j.pec.2019.09.012.
- 29 26. (WHO). WHO. World cancer report 2020. [https://www.iarc.fr/cards\\_page/world-cancer-report/2020](https://www.iarc.fr/cards_page/world-cancer-report/2020).
- 30 27. Khan KS, Ter Riet G, Glanville J, et al. *Undertaking systematic reviews of research on effectiveness: CRD's guidance for carrying out or commissioning reviews*. NHS  
31 Centre for Reviews and Dissemination, 2001.  
32  
33  
34  
35  
36  
37  
38  
39  
40  
41  
42  
43  
44  
45  
46

- 1  
2  
3  
4  
5 28. Popay J, Roberts H, Sowden A, et al. Guidance on the conduct of narrative synthesis in systematic reviews. *A product from the ESRC methods programme Version* 2006; 1: b92.
- 6  
7 29. Higgins JP, Altman DG, Gøtzsche PC, et al. The Cochrane Collaboration's tool for assessing risk of bias in randomised trials. *BMJ (Clinical research ed)* 2011; 343:  
8 d5928. 2011/10/20. DOI: 10.1136/bmj.d5928.
- 9  
10 30. Ventura F, Sawatzky R, Öhlén J, et al. Challenges of evaluating a computer-based educational programme for women diagnosed with early-stage breast cancer: a  
11 randomised controlled trial. *European journal of cancer care* 2017; 26 2016/06/25. DOI: 10.1111/ecc.12534.
- 12  
13 31. Lally RM, Kupzyk KA, Bellavia G, et al. CaringGuidance™ after breast cancer diagnosis eHealth psychoeducational intervention to reduce early post-diagnosis  
14 distress. *Supportive care in cancer : official journal of the Multinational Association of Supportive Care in Cancer* 2020; 28: 2163-2174. 2019/08/16. DOI:  
15 10.1007/s00520-019-05028-0.
- 16  
17 32. Dai SJ and Wang HY. Application of WeChat-assisted nurse-patient communication in young and middle-aged breast cancer patients after surgery(article in Chinese).  
18 *Journal of Nursing Science* 2017; 32: 98-100.
- 19  
20 33. Kim HJ and Kim HS. Effects of a web-based expert support self-management program (WEST) for women with breast cancer: A randomized controlled trial. *J Telemed*  
21 *Telecare* 2020; 26: 433-442. 2019/05/18. DOI: 10.1177/1357633x19850386.
- 22  
23 34. Visser A, Prins JB, Jansen L, et al. Group medical consultations (GMCs) and tablet-based online support group sessions in the follow-up of breast cancer: A multicenter  
24 randomized controlled trial. *Breast* 2018; 40: 181-188. 2018/06/16. DOI: 10.1016/j.breast.2018.05.012.
- 25  
26 35. Rosen KD, Paniagua SM, Kazanis W, et al. Quality of life among women diagnosed with breast Cancer: A randomized waitlist controlled trial of commercially  
27 available mobile app-delivered mindfulness training. *Psycho-oncology* 2018; 27: 2023-2030. 2018/05/17. DOI: 10.1002/pon.4764.
- 28  
29 36. Zhu JM, Ebert L, Liu XY, et al. Mobile Breast Cancer e-Support Program for Chinese Women With Breast Cancer Undergoing Chemotherapy (Part 2): Multicenter  
30 Randomized Controlled Trial. *Jmir Mhealth and Uhealth* 2018; 6. DOI: 10.2196/mhealth.9438.
- 31  
32 37. Zhou KN, Li J and Li XM. Effects of cyclic adjustment training delivered via a mobile device on psychological resilience, depression, and anxiety in Chinese  
33 post-surgical breast cancer patients. *Breast Cancer Research and Treatment* 2019; 178: 95-103. DOI: 10.1007/s10549-019-05368-9.
- 34  
35 38. Chee W, Lee Y, Im EO, et al. A culturally tailored Internet cancer support group for Asian American breast cancer survivors: A randomized controlled pilot intervention  
36 study. *J Telemed Telecare* 2017; 23: 618-626. 2016/08/04. DOI: 10.1177/1357633x16658369.
- 37  
38 39. Im EO, Kim S, Yang YL, et al. The efficacy of a technology-based information and coaching/support program on pain and symptoms in Asian American survivors of  
39 breast cancer. *cancer* 2020; 126: 670-680. DOI: 10.1002/cncr.32579.
- 40  
41 40. Zhou K, Wang W, Zhao W, et al. Benefits of a WeChat-based multimodal nursing program on early rehabilitation in postoperative women with breast cancer: a clinical  
42  
43  
44  
45  
46

- 1  
2  
3  
4  
5 randomized controlled trial. *International journal of nursing studies* 2020; 106: 103565. Journal Article; Randomized Controlled Trial. DOI: 10.1016/j.ijnurstu.2020.103565.
- 6 41. Zhou HM, J W and SY L. Effect of WeChat supported hospital-family collaborative transitional care on postoperative functional recovery in breast cancer  
7 patients(article in Chinese). *Journal of Nursing Science* 2019; 34: 63-66.
- 8 42. Xu HP, Wang S, Sun RP, et al. Internet and mobile technology use in case management among breast cancer patients after surgery(article in Chinese). *Chinese Nursing  
9 Management* 2017; 17: 1540-1544.
- 10 43. Wang L, Zou J and Du W. Feasibility analysis and clinical practice in the postoperative nursing care of breast cancer patients with chemotherapy after discharge by  
11 applying APP service platform of mobile phone(article in Chinese). *Journal of Qilu Nursing* 2016; 22: 22-24.
- 12 44. Li XY, Kan YY, Shi HP, et al. The effects of alert system for chemotherapy adverse events among breast cancer patients(article in Chinese). *Chinese Journal of Nursing*  
13 2018; 53: 1338-1342.
- 14 45. Wang W, Zhou KN, Zhao WQ, et al. Effect of internet-based continuous rehabilitation nursing support on health-related quality of life in postoperative chemotherapy  
15 patients with breast cancer(article in Chinese). *Chinese Nursing Research* 2019; 33: 1821-1826.
- 16 46. Peng CE, Li Z, Mao HX, et al. Effect of online and offline rehabilitation intervention on upper limb function and body image of patients with breast  
17 reconstruction after breast cancer surgery(article in Chinese). *Chinese Nursing Management* 2020; 20: 1637-1642.
- 18 47. Li L, Wu M, Li SJ, et al. Influence of continuous intervention of WeChat on cancer related fatigue and negative emotion in patients after breast cancer operation(article  
19 in Chinese). *Chinese Nursing Research* 2017; 031: 4675-4677.
- 20 48. Chen Y, Chen LY, Huang YF, et al. Effect of the tracking intervention baed on network information platform on quality of life for breast cancer survivors after  
21 surgery(article in Chinese). *Journal of Nursing Science* 2015; 30: 8-10.
- 22 49. Admiraal JM, van der Velden AWG, Geerling JI, et al. Web-Based Tailored Psychoeducation for Breast Cancer Patients at the Onset of the Survivorship Phase:  
23 A Multicenter Randomized Controlled Trial. *Journal of pain and symptom management* 2017; 54: 466-475. 2017/07/18. DOI: 10.1016/j.jpainsymman.2017.07.009.
- 24 50. Sherman KA, Przewdziecki A, Alcorso J, et al. Reducing Body Image-Related Distress in Women With Breast Cancer Using a Structured Online Writing Exercise:  
25 Results From the My Changed Body Randomized Controlled Trial. *Journal of clinical oncology : official journal of the American Society of Clinical Oncology* 2018; 36:  
26 1930-1940. 2018/04/25. DOI: 10.1200/jco.2017.76.3318.
- 27 51. Villani D, Cognetta C, Repetto C, et al. Promoting Emotional Well-Being in Older Breast Cancer Patients: Results From an eHealth Intervention. *Frontiers in  
28 psychology* 2018; 9: 2279. 2018/12/13. DOI: 10.3389/fpsyg.2018.02279.
- 29 52. Korkmaz S, Iyigun E and Tastan S. An Evaluation of the Influence of Web-Based Patient Education on the Anxiety and Life Quality of Patients Who Have Undergone  
30 Mammoplasty: a Randomized Controlled Study. *Journal of cancer education : the official journal of the American Association for Cancer Education* 2020; 35: 912-922.
- 31  
32  
33  
34  
35  
36  
37  
38  
39  
40  
41  
42  
43  
44  
45  
46

2019/05/24. DOI: 10.1007/s13187-019-01542-1.

53. Foley NM, O'Connell EP, Lehane EA, et al. PATI: Patient accessed tailored information: A pilot study to evaluate the effect on preoperative breast cancer patients of information delivered via a mobile application. *Breast* 2016; 30: 54-58. 2016/09/10. DOI: 10.1016/j.breast.2016.08.012.

54. Handa S, Okuyama H, Yamamoto H, et al. Effectiveness of a Smartphone Application as a Support Tool for Patients Undergoing Breast Cancer Chemotherapy: A Randomized Controlled Trial. *Clinical breast cancer* 2020; 20: 201-208. DOI: 10.1016/j.clbc.2020.01.004.

55. White V, Farrelly A, Pitcher M, et al. Does access to an information-based, breast cancer specific website help to reduce distress in young women with breast cancer? Results from a randomised trial. *European journal of cancer care* 2018; 27: e12897. 2018/08/24. DOI: 10.1111/ecc.12897.

56. Yue CL, Xu HP, Sun L, et al. The application effect of "Internet+" nursing mode intervention on lymphedema among postoperative patients with breast cancer(article in Chinese). *Chinese Nursing Management* 2020; 20: 670-676.

57. Wang ZJ, Lin ZJ and Ma HX. Application effect of specialized case management based on WeChat mobile platform in extended service of breast cancer patients(article in Chinese). *Chinese Nursing Research* 2019; 33: 524-527.

58. Egbring M, Far E, Roos M, et al. A Mobile App to Stabilize Daily Functional Activity of Breast Cancer Patients in Collaboration With the Physician: A Randomized Controlled Clinical Trial. *J Med Internet Res* 2016; 18: e238. 2016/09/08. DOI: 10.2196/jmir.6414.

59. Wheelock AE, Bock MA, Martin EL, et al. SIS.NET: a randomized controlled trial evaluating a web-based system for symptom management after treatment of breast cancer. *Cancer* 2015; 121: 893-899. 2014/12/04. DOI: 10.1002/cncr.29088.

60. Graetz I, McKillop CN, Stepanski E, et al. Use of a web-based app to improve breast cancer symptom management and adherence for aromatase inhibitors: a randomized controlled feasibility trial. *Journal of cancer survivorship : research and practice* 2018; 12: 431-440. 2018/03/02. DOI: 10.1007/s11764-018-0682-z.

61. Fjell M, Langius-Eklöf A, Nilsson M, et al. Reduced symptom burden with the support of an interactive app during neoadjuvant chemotherapy for breast cancer - A randomized controlled trial. *Breast* 2020; 51: 85-93. 2020/04/05. DOI: 10.1016/j.breast.2020.03.004.

62. Du P, Zhou Z, Du P, et al. Application and effectiveness evaluation of clinical decision support in breast cancer follow-up management(article in Chinese). *Chinese Nursing Management* 2021; 21: 110-115.

63. Liu Y, Liu SY, Feng DD, et al. Effect of an Innovative Follow-Up Technique on Improving the Resilience and Self-Efficacy in Patients with Breast Cancer during Endocrine Therapy(article in Chinese). *Journal of China Medical University* 2019; 48: 85-86.

64. Effects of chemotherapy and hormonal therapy for early breast cancer on recurrence and 15-year survival: an overview of the randomised trials. *Lancet (London, England)* 2005; 365: 1687-1717. 2005/05/17. DOI: 10.1016/s0140-6736(05)66544-0.

65. Distress management. Clinical practice guidelines. *Journal of the National Comprehensive Cancer Network : JNCCN* 2003; 1: 344-374. 2003/07/01. DOI:

1  
2  
3  
4  
5 10.6004/jnccn.2003.0031.

6 66. Kearney N, McCann L, Norrie J, et al. Evaluation of a mobile phone-based, advanced symptom management system (ASyMS©) in the management of  
7 chemotherapy-related toxicity. *Supportive Care in Cancer* 2009; 17: 437-444.

8 67. Wells AA, Gulbas L, Sanders-Thompson V, et al. African-American breast cancer survivors participating in a breast cancer support group: translating research into  
9 practice. *Journal of Cancer Education* 2014; 29: 619-625.

10 68. Chen Z, Zhang C and Fan G. Interrelationship between Interpersonal Interaction Intensity and Health Self-Efficacy in People with Diabetes or Prediabetes on Online  
11 Diabetes Social Platforms: An In-Depth Survey in China. *Int J Environ Res Public Health* 2020; 17 2020/07/30. DOI: 10.3390/ijerph17155375.

12 69. Hou IC, Lin HY, Shen SH, et al. Quality of Life of Women After a First Diagnosis of Breast Cancer Using a Self-Management Support mHealth App in Taiwan:  
13 Randomized Controlled Trial. *JMIR Mhealth Uhealth* 2020; 8: e17084. 2020/03/05. DOI: 10.2196/17084.  
14  
15  
16  
17  
18  
19  
20  
21  
22  
23  
24  
25  
26  
27  
28  
29  
30  
31  
32  
33  
34  
35  
36  
37  
38  
39  
40  
41  
42  
43  
44  
45  
46

**Table 2: Search strategy in MEDLINE (PubMed)**

1. Breast Neoplasms[MeSH Terms]
2. (breast cancer\*[Title/Abstract])) OR (breast neoplasm\*[Title/Abstract])) OR (breast carcinoma\*[Title/Abstract]))
3. #1 OR #2
4. Internet[MeSH Terms]
5. (((((((((((Tele-medicine[MeSH Terms]) OR (online\*[Title/Abstract])) OR (telehealth[Title/Abstract])) OR (e-health[Title/Abstract])) OR (m-health[Title/Abstract])) OR (e-intervention[Title/Abstract])) OR (e-technology[Title/Abstract])) OR (computer[Title/Abstract])) OR (mobile application[Title/Abstract])) OR (mobile device[Title/Abstract])) OR (social media[Title/Abstract])) OR (WeChat[Title/Abstract]))))
6. #4 OR #5
7. intervention[Title/Abstract]
8. (((((((((((Patient Education as Topic[MeSH Terms])) OR (support[Title/Abstract])) OR (teaching[Title/Abstract])) OR (instruction\*[Title/Abstract])) OR (program\*[Title/Abstract])) OR (psychoeducat\*[Title/Abstract])) OR (self-management[Title/Abstract])) OR (Social Support[Title/Abstract])) OR (support system\*[Title/Abstract])) OR (support group\*[Title/Abstract]))
9. #7 OR #8
10. #3 AND #6 AND #9
11. limit 12 to english language



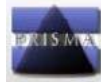

# PRISMA 2009 Checklist

| Section/topic                      | #  | Checklist item                                                                                                                                                                                                                                                                                              | Reported on page #  |
|------------------------------------|----|-------------------------------------------------------------------------------------------------------------------------------------------------------------------------------------------------------------------------------------------------------------------------------------------------------------|---------------------|
| <b>TITLE</b>                       |    |                                                                                                                                                                                                                                                                                                             |                     |
| Title                              | 1  | Identify the report as a systematic review, meta-analysis, or both.                                                                                                                                                                                                                                         | Page 1              |
| <b>ABSTRACT</b>                    |    |                                                                                                                                                                                                                                                                                                             |                     |
| Structured summary                 | 2  | Provide a structured summary including, as applicable: background; objectives; data sources; study eligibility criteria, participants, and interventions; study appraisal and synthesis methods; results; limitations; conclusions and implications of key findings; systematic review registration number. | Page 2              |
| <b>INTRODUCTION</b>                |    |                                                                                                                                                                                                                                                                                                             |                     |
| Rationale                          | 3  | Describe the rationale for the review in the context of what is already known.                                                                                                                                                                                                                              | Page 3-5            |
| Objectives                         | 4  | Provide an explicit statement of questions being addressed with reference to participants, interventions, comparisons, outcomes, and study design (PICOS).                                                                                                                                                  | Page 5              |
| <b>METHODS</b>                     |    |                                                                                                                                                                                                                                                                                                             |                     |
| Protocol and registration          | 5  | Indicate if a review protocol exists, if and where it can be accessed (e.g., Web address), and, if available, provide registration information including registration number.                                                                                                                               | Page 5              |
| Eligibility criteria               | 6  | Specify study characteristics (e.g., PICOS, length of follow-up) and report characteristics (e.g., years considered, language, publication status) used as criteria for eligibility, giving rationale.                                                                                                      | Page 5-6            |
| Information sources                | 7  | Describe all information sources (e.g., databases with dates of coverage, contact with study authors to identify additional studies) in the search and date last searched.                                                                                                                                  | Page 5              |
| Search                             | 8  | Present full electronic search strategy for at least one database, including any limits used, such that it could be repeated.                                                                                                                                                                               | Supplement material |
| Study selection                    | 9  | State the process for selecting studies (i.e., screening, eligibility, included in systematic review, and, if applicable, included in the meta-analysis).                                                                                                                                                   | Page 6              |
| Data collection process            | 10 | Describe method of data extraction from reports (e.g., piloted forms, independently, in duplicate) and any processes for obtaining and confirming data from investigators.                                                                                                                                  | Page 6              |
| Data items                         | 11 | List and define all variables for which data were sought (e.g., PICOS, funding sources) and any assumptions and simplifications made.                                                                                                                                                                       | Page 6              |
| Risk of bias in individual studies | 12 | Describe methods used for assessing risk of bias of individual studies (including specification of whether this was done at the study or outcome level), and how this information is to be used in any data synthesis.                                                                                      | Page 6-7            |
| Summary measures                   | 13 | State the principal summary measures (e.g., risk ratio, difference in means).                                                                                                                                                                                                                               | n/a                 |
| Synthesis of results               | 14 | Describe the methods of handling data and combining results of studies, if done, including measures of consistency (e.g., $I^2$ ) for each meta-analysis.                                                                                                                                                   | Page 6              |

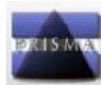

# PRISMA 2009 Checklist

| Section/topic                 | #  | Checklist item                                                                                                                                                                                           | Reported on page # |
|-------------------------------|----|----------------------------------------------------------------------------------------------------------------------------------------------------------------------------------------------------------|--------------------|
| Risk of bias across studies   | 15 | Specify any assessment of risk of bias that may affect the cumulative evidence (e.g., publication bias, selective reporting within studies).                                                             | n/a                |
| Additional analyses           | 16 | Describe methods of additional analyses (e.g., sensitivity or subgroup analyses, meta-regression), if done, indicating which were pre-specified.                                                         | n/a                |
| <b>RESULTS</b>                |    |                                                                                                                                                                                                          |                    |
| Study selection               | 17 | Give numbers of studies screened, assessed for eligibility, and included in the review, with reasons for exclusions at each stage, ideally with a flow diagram.                                          | Page 16            |
| Study characteristics         | 18 | For each study, present characteristics for which data were extracted (e.g., study size, PICOS, follow-up period) and provide the citations.                                                             | Page 7-9           |
| Risk of bias within studies   | 19 | Present data on risk of bias of each study and, if available, any outcome level assessment (see item 12).                                                                                                | Page 17-18         |
| Results of individual studies | 20 | For all outcomes considered (benefits or harms), present, for each study: (a) simple summary data for each intervention group (b) effect estimates and confidence intervals, ideally with a forest plot. | Page 19-22         |
| Synthesis of results          | 21 | Present results of each meta-analysis done, including confidence intervals and measures of consistency.                                                                                                  | n/a                |
| Risk of bias across studies   | 22 | Present results of any assessment of risk of bias across studies (see Item 15).                                                                                                                          | n/a                |
| Additional analysis           | 23 | Give results of additional analyses, if done (e.g., sensitivity or subgroup analyses, meta-regression [see Item 16]).                                                                                    | n/a                |
| <b>DISCUSSION</b>             |    |                                                                                                                                                                                                          |                    |
| Summary of evidence           | 24 | Summarize the main findings including the strength of evidence for each main outcome; consider their relevance to key groups (e.g., healthcare providers, users, and policy makers).                     | Page 11-13         |
| Limitations                   | 25 | Discuss limitations at study and outcome level (e.g., risk of bias), and at review-level (e.g., incomplete retrieval of identified research, reporting bias).                                            | Page 13-14         |
| Conclusions                   | 26 | Provide a general interpretation of the results in the context of other evidence, and implications for future research.                                                                                  | Page 14            |
| <b>FUNDING</b>                |    |                                                                                                                                                                                                          |                    |
| Funding                       | 27 | Describe sources of funding for the systematic review and other support (e.g., supply of data); role of funders for the systematic review.                                                               | Page 13            |

From: Moher D, Liberati A, Tetzlaff J, Altman DG, The PRISMA Group (2009). Preferred Reporting Items for Systematic Reviews and Meta-Analyses: The PRISMA Statement. PLoS Med 6(7): e1000097. doi:10.1371/journal.pmed1000097

For more information, visit: [www.prisma-statement.org](http://www.prisma-statement.org).

# BMJ Open

## Effectiveness of Internet-based Support Interventions on Breast Cancer Patients : A Systematic Review and Narrative Synthesis

|                                 |                                                                                                                                                                |
|---------------------------------|----------------------------------------------------------------------------------------------------------------------------------------------------------------|
| Journal:                        | <i>BMJ Open</i>                                                                                                                                                |
| Manuscript ID                   | bmjopen-2021-057664.R1                                                                                                                                         |
| Article Type:                   | Original research                                                                                                                                              |
| Date Submitted by the Author:   | 09-Mar-2022                                                                                                                                                    |
| Complete List of Authors:       | Huang, Yanwei; Xuzhou Medical College<br>Li, Qianqian; Xuzhou Medical College<br>Zhou, Fang; Xuzhou Medical College<br>Song, Jingyuan ; Xuzhou Medical College |
| <b>Primary Subject Heading</b>: | Oncology                                                                                                                                                       |
| Secondary Subject Heading:      | Nursing                                                                                                                                                        |
| Keywords:                       | ONCOLOGY, Breast tumours < ONCOLOGY, Telemedicine < BIOTECHNOLOGY & BIOINFORMATICS, BIOTECHNOLOGY & BIOINFORMATICS                                             |
|                                 |                                                                                                                                                                |

SCHOLARONE™  
Manuscripts



I, the Submitting Author has the right to grant and does grant on behalf of all authors of the Work (as defined in the below author licence), an exclusive licence and/or a non-exclusive licence for contributions from authors who are: i) UK Crown employees; ii) where BMJ has agreed a CC-BY licence shall apply, and/or iii) in accordance with the terms applicable for US Federal Government officers or employees acting as part of their official duties; on a worldwide, perpetual, irrevocable, royalty-free basis to BMJ Publishing Group Ltd ("BMJ") its licensees and where the relevant Journal is co-owned by BMJ to the co-owners of the Journal, to publish the Work in this journal and any other BMJ products and to exploit all rights, as set out in our [licence](#).

The Submitting Author accepts and understands that any supply made under these terms is made by BMJ to the Submitting Author unless you are acting as an employee on behalf of your employer or a postgraduate student of an affiliated institution which is paying any applicable article publishing charge ("APC") for Open Access articles. Where the Submitting Author wishes to make the Work available on an Open Access basis (and intends to pay the relevant APC), the terms of reuse of such Open Access shall be governed by a Creative Commons licence – details of these licences and which [Creative Commons](#) licence will apply to this Work are set out in our licence referred to above.

Other than as permitted in any relevant BMJ Author's Self Archiving Policies, I confirm this Work has not been accepted for publication elsewhere, is not being considered for publication elsewhere and does not duplicate material already published. I confirm all authors consent to publication of this Work and authorise the granting of this licence.

**Title page**

**Title of the article** Effectiveness of Internet-based Support Interventions on Breast Cancer

Patients:A Systematic Review and Narrative Synthesis

**Corresponding authors** Yanwei Huang<sup>1\*</sup>, Qianqian Li<sup>2\*</sup>, Fang Zhou<sup>1</sup>, Jingyuan Song<sup>1</sup>

**Author affiliations** <sup>1,2</sup>School of Nursing, Xuzhou Medical University, Xuzhou, Jiangsu 221002, China

**Correspondence to** Dr Jingyuan Song; [songjy@xzhmu.edu.cn](mailto:songjy@xzhmu.edu.cn)

**E-mail** Yanwei Huang: [1450482349@qq.com](mailto:1450482349@qq.com)

Qianqian Li: [2582940386@qq.com](mailto:2582940386@qq.com)

Fang Zhou: [zhoufang@xzhmu.edu.cn](mailto:zhoufang@xzhmu.edu.cn)

**Word Count** 4339

---

**Correspondence to**

Dr Jingyuan Song; [songjy@xzhmu.edu.cn](mailto:songjy@xzhmu.edu.cn)

**ABSTRACT**

**Objective** To identify the elements of Internet-based support interventions and assess their effectiveness at reducing psychological distress, anxiety and/or depression, physical variables (prevalence, severity and distress from physical symptoms), and improving quality of life, social support, and self-efficacy among breast cancer patients.

**Design** Systematic review and narrative synthesis

**Data sources** Web of Science, Cochrane Library, PubMed, Medline, PSycINFO, CINAHL, CNKI, Wanfang and VIP from over the past five years of each database to June 2021.

**Eligibility criteria for study selection** Included were randomized controlled trials (RCTs) or quasi-experimental (QE) studies focusing on Internet-based support interventions in breast cancer patients.

**Data extraction and synthesis** Reviewers independently screened, extracted data and assessed risk of bias (Cochrane Collaboration' risk of bias tool, Joanna Briggs Institute reviewer's manual). Narrative synthesis included the effect and elements of Internet-based support interventions for women with breast cancer.

**Results** Out of 2842 articles, 136 qualified articles were preliminarily identified. After further reading the full text, 35 references were included, including 30 randomized controlled trials and 5 quasi-experimental studies. Internet-based support interventions have demonstrated positive effects on women's quality of life and physical variables, but inconsistent effectiveness has been found on psychological distress, symptoms of anxiety and/or depression, social support, and self-efficacy.

**Conclusions** Internet-based support interventions are increasingly being used as clinically promising interventions to promote the health outcomes of breast cancer patients. Future research needs to implement more rigorous experimental design and include sufficient sample size to clarify the effectiveness of this Internet-based intervention.

**PROSPERO registration number** CRD42021271380.

**Keywords:** breast cancer; Internet; support; effectiveness; systematic review

### Strengths and limitations of this study

- ▶ It is important to identify the elements of Internet-based support interventions and to understand whether these interventions positively improve breast cancer patients' health outcomes. Comprehensive search using a sensitive search strategy identified a lot of potential correlation research.
- ▶ Due to the differences in research subjects, intervention contents, intervention programs, outcome indicators, and measurement instruments, no data synthesis was conducted for meta-analysis, and only narrative analysis was conducted.
- ▶ There is insufficient evidence to determine whether any component combination is superior to other component combinations in improving the quality of life.

### INTRODUCTION

Breast cancer is currently the most common malignant tumor in women worldwide <sup>1</sup>. World Health Organization(WHO) data show that the number of new cases of breast cancer in 2020 is as high as 2.26 million, exceeding lung cancer for the first time, becoming the world's highest incidence of cancer<sup>2</sup>. The treatment of breast cancer patients is based on the comprehensive treatment of surgery, supplemented by chemotherapy, radiotherapy, endocrine therapy, targeted therapy, and other treatment methods. As the health system's effectiveness in early diagnosis and treatment has improved, the number of breast cancer survivors has also increased significantly<sup>3</sup>.

However, the diagnosis and treatment of breast cancer bring patients varying degrees of treatment toxicities in the short term, such as pain, limited limb function, hair loss, nausea and vomiting, bone marrow suppression, and long-term physical and psychological distress symptoms such as impaired body image, fatigue, sleep disturbance, anxiety and depression, which seriously affect the quality of life<sup>4-6</sup>. The importance of supporting patients adequately regarding symptoms resulting from diagnosis and treatment has been widely recognized <sup>7</sup>. However, there are still many female breast cancer patients who report unmet supportive care needs, and these needs are mostly in the health system/information and psychology fields <sup>8 9</sup>. Besides, the patient's symptom distress, self-efficacy, and social support are three interrelated factors that affect a person's ability to cope with chronic diseases<sup>10</sup>. All the above may lead to poor quality of life for patients with breast cancer.

The survival rate of breast cancer is expected to continue to increase, leading to an increase in the

1  
2  
3  
4 number of patients requiring long-term care: this poses a challenge for the patients themselves, their  
5 families, and oncology services. However, geographical distance restrictions and scheduling issues  
6 challenge the feasibility of clinical face-to-face supportive care interventions <sup>11</sup>.  
7  
8

9  
10 At present, medical personnel can provide customized supportive care for patients with the Internet  
11 as the carrier and information technology as the means (including mobile communication technology,  
12 cloud computing, Internet of Things, big data, etc.), which is also increasingly favored by cancer  
13 patients <sup>12 13</sup>. Internet-based support interventions are defined as smartphones and tablets (including  
14 apps), websites, social media and other mobile devices-delivered support programs to provide  
15 information and facilitate communication regarding self-care management and adverse effects related  
16 to toxicities owing to breast cancer therapy<sup>7 14 15</sup>.  
17  
18

19  
20 Internet-based support interventions often take the form of multi-modal interventions, including  
21 information support, symptom management, behavior management, psychological support,  
22 Communication/Interaction with health professionals and peer support. In order to meet the  
23 information and support needs, in the past few years, health care providers have cooperated with  
24 information technology professionals to develop self-guided psycho-educational or educational  
25 websites or APP<sup>16-20</sup>, e-health support systems<sup>21-23</sup> in the field of cancer. In the area of symptom  
26 management research, Internet-based support interventions include evidence or knowledge on  
27 self-management strategies<sup>23 24</sup>, symptom self-reporting<sup>22 25</sup>, symptom warning combined with risk  
28 rating assessment tools and tailored recommendations<sup>23 25-27</sup>. Internet-based psychological support  
29 interventions include self-directed and expert-supported psychological diagnosis, treatment and  
30 counseling, are important to help breast cancer patients transition from treatment to recovery <sup>16 19 20 24</sup>  
31  
32  
33  
34  
35  
36  
37  
38  
39  
40  
41  
42  
43  
44  
45  
46  
47  
48  
49  
50  
51  
52  
53  
54  
55  
56  
57  
58  
59  
60  
28-34. In the area of symptom management research, Internet-based support interventions include  
self-report aromatase inhibitor compliance<sup>25 35</sup>, keeping a health diary, self-diagnose lifestyle and  
receiving information about exercise and rehabilitation diet and nutrition from APP modules<sup>24</sup> or health  
care professionals<sup>36 37</sup>. Internet-based forms of peer support interventions include the provision of  
breast cancer survivor videos <sup>16 17 34</sup>, support group forums or discussion boards <sup>16 17 24 30 38 39</sup>, group  
medical counseling<sup>40</sup>, and online and offline recovery volunteer support activities<sup>41 42</sup>.

Previous original studies have measured the effectiveness of Internet-based support interventions in  
cancer patients on anxiety and/or depression<sup>18 29</sup>, psychological distress<sup>43 44</sup>, social support<sup>45</sup>, physical  
variables<sup>46</sup>, and quality of life<sup>47 48</sup>. Among these outcomes of interest, physical variables refer to the



1  
2  
3  
4 prevalence, severity and distress from physical symptoms<sup>49</sup>. Besides, more evidence is needed. In this  
5 fast-developing research field, it is important to regularly recapitulate its status. In addition, China is  
6 the world's most populous country, breast cancer is one of the most common malignant tumors in  
7 Chinese women<sup>50</sup>. This article integrates articles published in Chinese or English to help understand the  
8 impact of Internet-based support interventions on breast cancer patients at the global level<sup>45</sup>.  
9  
10  
11  
12

13 This systematic review aims to identify the elements of Internet-based support interventions and  
14 assess their effectiveness at reducing psychological distress, anxiety and depression, physical variables,  
15 and improving quality of life, social support, and self-efficacy among breast cancer patients.  
16  
17  
18  
19  
20

## 21 **METHODS**

22  
23 We performed a systematic review based on PRISMA guidelines, and it was registered in PROSPERO  
24 (CRD 42021271380) from [https://www.crd.york.ac.uk/PROSPERO/display\\_record.php?RecordID=](https://www.crd.york.ac.uk/PROSPERO/display_record.php?RecordID=271380)  
25 271380.  
26  
27  
28  
29  
30

### 31 **Search strategy**

32  
33 Seven electronic databases were searched: Web of Science, Cochrane Library, PubMed, Medline,  
34 PSycINFO, CINAHL, CNKI, Wanfang and VIP. We searched the articles from over the past five years  
35 of each database to June 2021. (see supplemental file)The search keywords included “breast neoplasm  
36 OR breast cancer” AND “Telemedicine OR online OR Internet OR connected health OR telehealth OR  
37 e-health OR m-health OR e-intervention OR e-technology OR computer OR mobile application OR  
38 mobile device OR social media OR WeChat” AND “patient education OR intervention OR support OR  
39 teaching OR instruction\* OR program\* OR psychoeducat\* OR self-management OR Social Support  
40 OR support system\* OR support group\*”. (Full details of the search strategy employed with each  
41 database are detailed in online supplemental file).  
42  
43  
44  
45  
46  
47  
48  
49  
50

### 51 **Inclusion and Exclusion Criteria**

52  
53 In this systematic review, we included the following: (1)The population is adult women with breast  
54 cancer patients, (2)Studies about Internet-based support interventions, defined as smartphones and  
55 tablets (including apps), website, social media and other mobile devices-delivered support programs to  
56 provide information and facilitate communication regarding self-management and adverse effects  
57  
58  
59  
60

1  
2  
3  
4 related to toxicities owing to breast cancer therapy, (3) All intervention study types including  
5 randomized controlled trials or quasi-experimental intervention studies were considered, (4) Outcome  
6 variables in the study included one of the following, such as psychological distress, anxiety and/or  
7 depression, physical variables, social support, self-efficacy and quality of life, and (5) Articles were  
8 written in English or Chinese.  
9  
10  
11  
12

13 Studies were excluded for the following reasons: (1) if they focused on Internet-based support  
14 interventions related to other types of cancer, (2) Study types include review, non-clinical study,  
15 meta-analysis, etc, (3) The full text cannot be obtained; (4) Repeated publications.  
16  
17  
18  
19  
20

### 21 **Study selection and data extraction**

22  
23 All stages of study selection, data extraction was conducted by two researchers independently, and  
24 disagreements were resolved by consultation with a third researcher. For included studies, the following data  
25 were extracted with a predetermined data extraction form, including study characteristics (author(s), country  
26 and year of publication), sample size, intervention characteristics and outcome characteristics. Missing data  
27 would be obtained from authors by email, if possible.  
28  
29  
30  
31  
32  
33  
34

### 35 **Data synthesis**

36 The data synthesis was undertaken following CRD's guidance<sup>51</sup>. This study follows the narrative synthesis  
37 method of Popay *et al*, and conducts narrative synthesis in a systematic and transparent way, focusing on the  
38 effect and content elements of intervention measures<sup>52</sup>.  
39  
40  
41  
42  
43  
44

### 45 **Assessment of risk of bias**

46 The quality of RCTs studies was assessed using the Cochrane Collaboration' risk of bias tool<sup>53</sup>. This  
47 tool rates 7 domains as having a low, unclear, or high risk of bias. These domains consist of sequence  
48 generation, allocation concealment, participants' and study personnel's blinding; outcome assessment  
49 blinding; outcome data completeness; selective outcomes' reporting; and other threats to validity,  
50 including intervention contamination, baseline imbalance, and carry-over effect in cross-over trials). In  
51 addition, we used the Joanna Briggs Institute reviewer's manual to evaluate the risk of bias of  
52 quasi-experimental studies<sup>54</sup>. The overall quality of the quasi-experimental research is evaluated from 9  
53 items including causality, baseline, intervention, control, outcome index measurement, follow-up and  
54  
55  
56  
57  
58  
59  
60

1  
2  
3  
4 analysis.  
5  
6

## 7 **Patient and Public Involvement**

8  
9 No patient involved.  
10  
11

## 12 **RESULTS**

### 13 **Selection of studies**

14  
15 A total of 2842 references were obtained through database retrieval and reference tracing. After reading  
16 the titles and abstracts to exclude duplicates, 136 references were obtained through preliminary  
17 screening. After further reading the full text, 35 references were finally included per all inclusion and  
18 exclusion criteria established for the systematic review (see figure 1).  
19  
20  
21  
22  
23  
24  
25  
26

### 27 **Study characteristics and risk of bias**

28  
29 The quality appraisal of the 35 articles is shown in Table 1 and Table 2, and the Characteristics of the  
30 included studies are summarized in Table 3 and Table 4. A total of 35 articles were included in this  
31 literature review. Sixteen studies were undertaken in mainland China, six in the United States, two in  
32 the Netherlands, two in Australia, two in Sweden, One study each in Taiwan, Turkey, Switzerland,  
33 Italy, Japan, Korea and Ireland. Thirty study designs were RCTs, the other five study designs were  
34 quasi-experimental studies.  
35  
36  
37  
38  
39

40 The delivery modes of Internet-based support intervention include website platform (n=9),  
41 mobile application program (n=13), WeChat platform (n=11), a full-process information manage  
42 -ment system (n=1), a web-based computer system (n=1), a computer-based programme (n=1).  
43  
44  
45

46 There are 12 articles on tailored interventions.  
47  
48  
49

### 50 **Description of participants**

51  
52 The 35 studies consisted of 5368 patients. The participant sample sizes ranged from 29 to 638  
53 participants. The mean ages ranged from 41.1~59.9 years. Seven studies analyzed patients with locally  
54 or locally advanced cancer (stages I-III), whereas three studies only included cancer patients with  
55 stages I-II<sup>16 21 55</sup>. Five studies included solely patients who had completed cancer treatment during their  
56 follow-up<sup>17 28 29 36 40</sup>, twenty-seven studies only included patients during treatment and four studies  
57  
58  
59  
60

1  
2  
3  
4 patients in all treatment phases<sup>28 38 40 56</sup>.

### 7 **Content elements of Internet-based support Intervention Internet-based support**

9 Internet-based support intervention contained six elements : (1) Information support (n=33)<sup>16-21 24 26-32 36-42</sup>  
11 <sup>55-63</sup>: including breast cancer disease and treatment knowledge, self-management strategies for physical  
12 symptoms and recovery, available aid resources or organizational service information, expert consultation or  
13 outpatient consultation arrangements, and expert lectures. (2) Symptom management (n=10)<sup>22-27 58-60 62</sup>:  
14 including patients' self-assessment and monitoring of their physiological symptoms, medical staff' s  
15 self-management guidance for patients, automatic feedback of symptom management APP or system, and  
16 symptom early warning processing combined with clinical risk algorithm. (3) Behavior management (n=5)<sup>24</sup>  
17 <sup>25 35-37</sup>: including medication compliance management, limb functional exercise compliance management,  
18 infusion port maintenance, healthy lifestyle management. (4) Psychological support (n=11)<sup>16 19 20 24 28-34</sup>:  
19 divided into self-guided and professional guidance/support. Self-guided psychological support is realized  
20 by the corresponding modules of intervention independently completed by breast cancer patients.  
21 Professionally guided psychological support is conducted through e-mail interaction with the therapists or  
22 online interaction with groups of other breast cancer patients. It includes negative emotional self-assessment  
23 or monitoring, cognitive behavioral therapy, mindfulness training, expressive writing to alleviate physical  
24 image distress, psychological education, cognitive behavioral therapy, etc. (5) Interaction with health care  
25 professionals (n=25)<sup>17 22-24 26 29 30 32 34-42 55-62</sup>: The main form is that breast cancer patients directly contact  
26 with health professionals and ask questions, health professionals give advice or emotional support to breast  
27 cancer patients. (6) Peer support (n=20)<sup>16-18 24 29-32 34 35 37-42 55-57 59 61</sup>: Support information, emotional support  
28 and rehabilitation experience sharing are mainly provided by other breast cancer patients.

29 Intervention providers were mainly nurses or physicians, a few multidisciplinary teams<sup>24 57 58</sup> brought  
30 together by physicians, nurses, dietitians, physiatrists, psychotherapists, and information engineers. In terms  
31 of intervention sample size, due to the study conditions, most of the interventions were conducted in small  
32 samples, with single-group sample sizes mostly concentrated in 30-60 individuals, and only six studies<sup>20 26 29</sup>  
33 <sup>38 39 58</sup> with sample sizes of 61-100, and only seven studies<sup>19 21 33 39 42 57 59</sup> with sample sizes of more than 100,  
34 while only three studies<sup>25 31 34</sup> with sample sizes of less than 30.

35 Based on the duration of intervention, 22 intervention studies focused on the period from breast cancer  
36 diagnosis to radiotherapy and chemotherapy, and the duration of intervention was mostly 3-6 months<sup>16 17 19</sup>

1  
2  
3  
4 23 24 27 29 30 32 34 55 57 61. Only two studies <sup>21 39</sup> lasted nine months, while the intervention duration of the other  
5 seven studies<sup>18 31 37 58-60 62</sup> ranged from two weeks to eight weeks.  
6  
7  
8

### 9 **Interventions and associated outcomes**

10  
11 In this systematic review, the Internet-based support interventions were evaluated for their effectiveness on  
12 Quality of life, anxiety and/or depression, psychological distress, physical variables, social support, and  
13 self-efficacy. The measurement scales are shown in Table 3 and 4.  
14  
15  
16

### 17 **Quality of life**

18  
19 Eighteen studies reported on quality of life with significant positive intervention effects reported by  
20 seventeen <sup>17-19 24 26 28 30 32 34 37 41 55-61</sup>. In seven RCTs and four quasi-experimental studies conducted in China,  
21 the quality of life score of the intervention group was higher than that of the control group <sup>17 29 30 32 37 41 57-61</sup>.  
22  
23 A web-based tailored psycho-educational intervention for breast cancer patients who completed  
24 curative-intent primary treatment reported that improvements in distress, distress-related problems  
25 (practical, family/social, emotional, religious/spiritual, and physical problems) and quality of life were  
26 observed in both study groups but no significant differences <sup>20</sup>.  
27  
28  
29  
30  
31  
32  
33  
34  
35  
36

### 37 **Anxiety and/or depression**

38  
39 Eleven studies found inconsistent results regarding the impact of the Internet-based Support Interventions on  
40 symptoms of anxiety and/or depression. The results of six RCTs and one quasi-experimental study included  
41 in this review showed that Internet-based support interventions significantly improved anxiety and  
42 depression in breast cancer patients <sup>18 29 33 34 37 59 61</sup>. The limitations of other studies may explain the  
43 insignificant effects of the intervention, such as short follow-up time <sup>27 31</sup>, underrepresentation of the  
44 research subjects <sup>19</sup>, the lack of human-computer interaction in the system<sup>21</sup>, the average level of anxiety and  
45 depression among participants at baseline was within the normal range for non-clinical samples.  
46  
47  
48  
49  
50  
51  
52  
53

### 54 **Psychological distress**

55  
56 Five studies reported inconsistent results concerning the effectiveness of Internet-based support  
57 interventions on psychological distress. In an RCT study of online expressive writing focused on  
58 self-compassion, participants in the intervention group reported significantly less body image-related  
59  
60

1  
2  
3  
4 distress and greater body appreciation than only expressive writing participants in the control group<sup>33</sup>. In  
5  
6 one pretest-posttest design, which findings supported the positive effects of the Internet Cancer Support  
7  
8 Group on psychological symptoms<sup>56</sup>. In the other three RCTs concerning psychological education and  
9  
10 group medical consultation, patients in the intervention group reported lower scores of psychological  
11  
12 distress than the control group, but this difference was not significant<sup>16 20 40</sup>.

### 13 14 15 **Physical variables**

16  
17 Seventeen studies reported on physical variables, including the prevalence, severity and distress from  
18  
19 physical symptoms. All except two studies<sup>30 58</sup> which was conducted in China showed positive  
20  
21 significant intervention effects. In five non-randomized studies and four RCT studies conducted in  
22  
23 China, patients in the intervention group reported significantly improved symptoms of lymphedema<sup>42</sup>  
24  
25 <sup>57</sup>, body image distress<sup>41</sup>, fatigue symptoms<sup>37 39</sup>, nausea and vomiting and other gastrointestinal  
26  
27 discomfort symptoms<sup>39 55 60</sup>, postoperative complications<sup>58</sup> and the prevalence of adverse drug  
28  
29 reaction<sup>59</sup>. In the other six studies, three of them are RCTs<sup>17 22 62</sup>, and the other two are randomized  
30  
31 pretest-posttest designs<sup>38 56</sup>, symptom distress was significantly lower in the intervention group, and  
32  
33 there was a trend toward lower symptom severity and symptom prevalence. In an pilot RCT in USA<sup>25</sup>,  
34  
35 Symptom burden increase was higher for the App group compared to the App+Reminder group but did  
36  
37 not reach statistical significance. In an RCT study in Sweden, an interactive application-based  
38  
39 symptom management intervention significantly reduced the prevalence of nausea, vomiting, loss of  
40  
41 appetite, and constipation during neoadjuvant chemotherapy<sup>26</sup>.

### 42 43 44 **Social support**

45  
46 Two studies showed that the online interventions did not significantly improve patients' social support.  
47  
48 In one RCT, Internet-based support intervention did not significantly change social support relative to  
49  
50 the effect of usual care alone at 3 months<sup>17</sup>. However, the longer women used the Internet-based  
51  
52 support program, the higher women perceived social support. One study focused on online support  
53  
54 groups did not significantly improve patient perceived social support, which effectiveness appeared  
55  
56 influenced by other factors, such as socio-demographic background and disease<sup>56</sup>.

### 57 58 59 **Self-efficacy**

1  
2  
3  
4 Self-efficacy was reported in six studies, of which three studies had significant positive intervention  
5 effects on it. In three RCTs conducted in China, concerning a breast cancer e-support program<sup>17</sup>, a  
6 full-process information management system for breast cancer patients based on clinical decision  
7 support<sup>23</sup> and follow-up of innovative approaches based on WeChat platform<sup>35</sup>, the intervention groups  
8 reported improved self-efficacy than control groups. In the other three RCTs, regarding a web-based  
9 expert support self-management program<sup>36</sup>, a computer-based educational program<sup>21</sup>, and the Internet  
10 Cancer Support Group<sup>56</sup>, participants in the two groups showed no significant differences in  
11 self-efficacy.  
12  
13  
14  
15  
16  
17  
18  
19  
20

## 21 DISCUSSION

22  
23 This review examines the effectiveness of Internet-based support interventions for various health  
24 outcomes in patients with breast cancer. Due to the rapid growth of online interventions in this group in  
25 recent years, this review focuses on studies published over the past five years. A total of 35 studies  
26 were identified.  
27  
28  
29

30  
31 In the research field of supporting and caring for breast cancer, the content elements of Internet  
32 intervention include information support, symptom management, behavior management, psychological  
33 support, contact with medical staff and peer support. In some studies, information support or  
34 psychological support is provided to breast cancer patients only through Internet intervention<sup>18 31 33</sup>.  
35 However, in addition to providing information support or psychological support, most studies also  
36 provide comprehensive interventions such as symptom management, peer support and interaction with  
37 medical staff. Breast cancer patients believe peer support<sup>40 64</sup> or interacting with professionals<sup>17 20 21</sup>  
38 <sup>36 62</sup> is more useful than simply providing care information or psychological support. This suggests that  
39 multi-element Internet-based support interventions are favored by breast cancer patients.  
40  
41  
42  
43  
44  
45  
46  
47  
48

49 In addition, some studies based on evidence-based self-help intelligent information technology  
50 system can provide personalized customized information for patients, reduce the information burden  
51 unrelated to specific diagnosis or cancer stage, and to some extent solve the information limitation  
52 caused by the imbalance of health resources in various regions<sup>16 19 20 23 26 27 37 60</sup>. In the future, it is  
53 necessary to organize multidisciplinary teams to develop elements and programs for personalized  
54 assessment and comprehensive intervention of Internet support interventions, and to involve breast  
55 cancer patients from end users in the process of intervention research and development. Based on the  
56  
57  
58  
59  
60

1  
2  
3  
4 current situation of uneven resources of experts in various regions, the research and development of  
5 intelligent decision-making system can be explored to realize the customization and recommendation  
6 of personalized schemes.  
7  
8

9 For patients who prioritize the use of the Internet to meet the information and support needs,  
10 adding face-to-face contact interventions may be insignificant and have little impact on outcomes. For  
11 patients who prioritize face-to-face contact as a source of information and support, adding face-to-face  
12 contact into Internet intervention research may be important, but this may reduce the explanatory  
13 power of the intervention effect of Internet intervention research itself<sup>21</sup>.  
14  
15  
16  
17  
18

19 The optimal duration of Internet-based support interventions remains to be explored. The limited  
20 duration of follow-up for Internet-based interventions hinders the long-term effects of such  
21 Internet-based support interventions. Most of the studies included in this review were followed up for  
22 no more than 6 months, and only 5 studies were followed up for 9, 12 or 18 months<sup>21 22 35 39 41</sup>. In  
23 current and future studies, there is a need to extend the periodicity and follow-up of the Internet support  
24 intervention to explore whether this intervention has long-term benefits for breast cancer. In addition,  
25 the charging and sustainability of the Internet support platform should be considered in the integration  
26 into the daily care of patients and needs to be further explored.  
27  
28  
29  
30  
31  
32  
33

34 Quality of life is a major prognostic indicator for breast cancer patients, as diagnosis and treatment  
35 often result in significantly impaired quality of life<sup>4</sup>. Modern oncology disciplines unanimously  
36 believe that the quality of life of cancer patients is more representative of the cure effect and recovery  
37 status of the patient than the survival period and mortality rate<sup>65</sup>. Overall, Internet-based support  
38 interventions can improve the quality of life of breast cancer patients. Only one study does not  
39 support this view<sup>20</sup>, and the study was a web-based tailored psycho-educational program. Patients were  
40 not guided throughout all the problem solving therapy phases and may have been exposed too little to  
41 the content of the program to solicit any observable effect, which were their explanation for why their  
42 intervention may not have significantly impacted quality of life<sup>20</sup>. On the one hand, the reason may be  
43 that the intervention content of this study is unitary, and only psychological and information  
44 intervention is carried out. The measurement standard of quality of life includes many aspects such as  
45 physiology, psychology and society, and is affected by many factors. On the other hand, affected by  
46 the differences in ethnic culture, people in different regions will have differences even if they use the  
47 same measurement scale.  
48  
49  
50  
51  
52  
53  
54  
55  
56  
57  
58  
59  
60



1  
2  
3  
4 The National Comprehensive Cancer Network (NCCN) <sup>66</sup> currently defines" psychological  
5 distress" as an unpleasant emotional experience of psychological, social, and/or spiritual nature  
6 caused by multiple factors, which can further aggravate physical symptoms, impact treatment  
7 compliance and quality of life. The negative emotions of cancer patients are affected by many factors,  
8 such as disease cognition, social support and physiological status. The results of this review show that  
9 the effect of Internet-based support intervention on reducing negative emotions of breast cancer  
10 patients is still controversial. It is suggested that future research needs to further analyze the promotion  
11 and obstacle factors of Internet psychological support intervention, and explore improvement strategies  
12 to better implement and promote network intervention <sup>21 31 40</sup>.

13  
14  
15  
16  
17  
18  
19  
20  
21 This review included 17 studies that reported indicators related to physical symptoms. Eight  
22 studies focused on the alleviation of physical symptoms distress in breast cancer patients, and the other  
23 eight studies focused on the severity of physical symptoms in patients. Few studies focused on the  
24 changes of other measurement indicators, such as the prevalence or number of physical symptoms.  
25 Indeed, the goal of symptom management is not necessarily to prevent symptoms, but to reduce their  
26 severity and impact on psychological distress and quality of life. Kearney et al<sup>67</sup> reported that  
27 monitoring and reporting of symptoms may also manifest as an increase in symptom severity  
28 depending on the time of assessment or patient self-report, better reflecting actual symptom burden and  
29 providing a clearer target for intervention.

30  
31  
32  
33  
34  
35  
36  
37  
38  
39  
40  
41  
42  
43  
44  
45  
46  
47  
48  
49  
50  
51  
52  
53  
54  
55  
56  
57  
58  
59  
60  
Lack of social support for patients with chronic diseases including breast cancer is associated with  
poor emotional health, increased depressive symptoms and poor quality of life<sup>68</sup>. Besides, studies also  
have shown that improving self-efficacy can promote behavior change, improve self-management  
ability, quality of life, and confidence in coping with illness<sup>69</sup>.—Although social support and  
self-efficacy are important factors affecting the quality of life of breast cancer patients, this review  
found that the effect of Internet-based support intervention on these two measurement indicators is still  
controversial, which needs further discussion in future research.

### Limitations

First, due to language restrictions, only published literature in Chinese and English from this review.  
Second, this review focused on only six health outcomes to test the effectiveness of Internet-based  
interventions; therefore, the amount of literature selected may have been reduced. To obtain a more

1  
2  
3  
4 comprehensive picture, future reviews could include other health outcomes such as supportive care  
5 needs, satisfaction with cancer treatment, and decision conflict/distress. Again, the heterogeneity of the  
6 included studies in terms of sample and methodology, the different age and tumor stages of the study  
7 population, the differences in the content, modality, frequency, and duration of the interventions  
8 adopted by the studies, and the different measurement tools for the same outcome indicators did not  
9 lend themselves to a combined study; therefore, this review is only a descriptive study of the findings.  
10  
11 Finally, some of the studies included in this review had small sample sizes<sup>25 31 34</sup>. The insignificant  
12  
13 impact may be due to a lack of statistical power rather than a true intervention nullification.  
14  
15  
16  
17  
18  
19  
20

## 21 **Conclusion**

22  
23 The results of this review suggest that Internet-based support intervention can have a positive effect on  
24 patients with breast cancer, and can effectively improve the quality of life of patients. However, the  
25 effect of Internet-based support intervention on patients' physical symptoms, social support,  
26 self-efficacy, anxiety, depression and other negative emotions is still controversial, which is worthy of  
27 further discussion in future intervention studies. In the future, it is necessary to standardize  
28 Internet-based support interventions (content, form, frequency, duration), formulate a unified  
29 evaluation index system, design larger sample, multi-center randomized controlled trials, and further  
30 explore the long-term intervention effect of Internet-based support nursing on breast cancer patients.  
31  
32 Medical professionals can combine the existing or new Internet-based interventions with the clinical  
33 nursing path of breast cancer patients and their daily life self-management to improve the quality of life  
34 among breast cancer patients. With the participation of multidisciplinary teams and breast cancer  
35 patients, the research and development of intelligent decision-making system is explored to realize the  
36 customization and recommendation of personalized intervention programs.  
37  
38  
39  
40  
41  
42  
43  
44  
45  
46  
47  
48  
49

50 **Acknowledgements** We thank breast cancer patients and health professionals' involvement and  
51 their input on the study design.  
52  
53

54 **Contributors** Yw H& Qq L: study design, data collection and analysis, drafting and revising the  
55 manuscript. FZ: supervision of study design, data collection and analysis, revising the manuscript. Jy S:  
56 supervision of study design, data collection and analysis, revising the manuscript.  
57  
58  
59  
60

1  
2  
3  
4 **Funding** This study is supported by The Natural Science Foundation of the Jiangsu Higher Education  
5 Institutions of China, No. 18KJA320013.

6  
7 **Competing interests** None declared.

8  
9 **Patient consent for publication** Not required.

10  
11 **Ethics approval statement** Not required.

12  
13 **Provenance and peer review** Not commissioned; externally peer reviewed.

14  
15 **Data Availability Statements** Data sharing not applicable to this article as no datasets were  
16 generated or analyzed during the current study.

17  
18  
19 **Open access** This is an open access article distributed in accordance with the Creative Commons  
20 Attribution Non Commercial (CC BY-NC 4.0) license, which permits others to distribute, remix, adapt,  
21 build upon this work non-commercially, and license their derivative works on different terms, provided  
22 the original work is properly cited, appropriate credit is given, any changes made indicated, and the use  
23 is non-commercial. See: <http://creativecommons.org/licenses/by-nc/4.0/>.

1  
2  
3  
4  
5  
6  
7  
8  
9  
10  
11  
12  
13  
14  
15  
16  
17  
18  
19  
20  
21  
22  
23  
24  
25  
26  
27  
28  
29  
30  
31  
32  
33  
34  
35  
36  
37  
38  
39  
40  
41  
42  
43  
44  
45  
46

**Table 1 Risk of Bias Assessment Tool for RCTs**

| References                  | Item 1 | Item 2 | Item 3 | Item 4 | Item 5 | Item 6 | Item 7 |
|-----------------------------|--------|--------|--------|--------|--------|--------|--------|
| Lally,2020 <sup>16</sup>    | +      | ?      | ?      | ?      | +      | +      | +      |
| Zhu,2018 <sup>17</sup>      | +      | +      | ?      | +      | +      | +      | +      |
| Korkmaz,2020 <sup>18</sup>  | +      | ?      | ?      | ?      | +      | +      | +      |
| White,2018 <sup>19</sup>    | +      | ?      | ?      | ?      | +      | +      | +      |
| Admiraal,2017 <sup>20</sup> | +      | +      | -      | -      | +      | +      | +      |
| Ventura,2017 <sup>21</sup>  | +      | +      | ?      | ?      | +      | +      | +      |
| Wheelock,2015 <sup>22</sup> | +      | ?      | ?      | ?      | +      | +      | +      |
| Du,2021 <sup>23</sup>       | +      | ?      | ?      | ?      | +      | +      | +      |
| Hou,2020 <sup>24</sup>      | +      | +      | +      | +      | +      | +      | +      |
| Graetz,2018 <sup>25</sup>   | +      | +      | ?      | ?      | +      | +      | +      |
| Fjell,2020 <sup>26</sup>    | +      | +      | ?      | ?      | +      | +      | +      |
| Handa,2020 <sup>27</sup>    | +      | ?      | ?      | ?      | +      | +      | +      |
| Rosen,2018 <sup>28</sup>    | +      | -      | -      | -      | +      | +      | +      |
| Zhou,2019 <sup>29</sup>     | +      | ?      | +      | +      | +      | +      | +      |
| Zhou,2020 <sup>30</sup>     | +      | +      | +      | ?      | +      | +      | +      |
| Foley,2016 <sup>31</sup>    | +      | ?      | ?      | ?      | +      | +      | +      |
| Wang,2019 <sup>32</sup>     | +      | ?      | ?      | ?      | +      | +      | +      |
| Sherman,2018 <sup>33</sup>  | +      | ?      | ?      | ?      | +      | +      | +      |
| Villani,2018 <sup>34</sup>  | ?      | ?      | ?      | ?      | +      | +      | +      |
| Liu, 2019 <sup>35</sup>     | ?      | ?      | ?      | ?      | +      | +      | +      |
| Kim,2020 <sup>36</sup>      | +      | ?      | ?      | ?      | +      | +      | +      |
| Im,2020 <sup>38</sup>       | +      | ?      | ?      | +      | +      | +      | +      |
| Wang,2019 <sup>39</sup>     | ?      | ?      | ?      | ?      | +      | +      | +      |
| Visser,2018 <sup>40</sup>   | ?      | ?      | -      | -      | +      | +      | +      |
| Peng,2020 <sup>41</sup>     | ?      | ?      | ?      | ?      | +      | +      | +      |

**Table 1 Risk of Bias Assessment Tool for RCTs**

| References                 | Item 1 | Item 2 | Item 3 | Item 4 | Item 5 | Item 6 | Item 7 |
|----------------------------|--------|--------|--------|--------|--------|--------|--------|
| Chee,2016 <sup>56</sup>    | +      | ?      | ?      | +      | +      | +      | +      |
| Wang,2017 <sup>59</sup>    | +      | ?      | ?      | ?      | +      | +      | +      |
| Li,2018 <sup>60</sup>      | ?      | ?      | ?      | ?      | +      | +      | +      |
| Chen,2015 <sup>61</sup>    | +      | ?      | ?      | ?      | +      | +      | +      |
| Egbring,2016 <sup>62</sup> | +      | +      | ?      | ?      | +      | +      | +      |

Key: “+” =low risk of bias; “-” –high risk of bias; “?” – unclear risk of bias. Item 1: Random sequence generation; Item 2: Allocation concealment; Item3: Blinding of participants and personnel; Item 4: Blinding of outcome assessment; Item 5: Incomplete outcome data; Item 6: Selective outcome; Item 7: Other sources of bias

**Table 2 Risk of Bias Assessment Tool for quasi-experimental studies**

| References              | Item 1 | Item 2 | Item 3 | Item 4 | Item 5 | Item 6 | Item 7 | Item 8 | Item 9 |
|-------------------------|--------|--------|--------|--------|--------|--------|--------|--------|--------|
| Li,2017 <sup>37</sup>   | Y      | CT     | CT     | Y      | Y      | Y      | CT     | CT     | Y      |
| Yue,2020 <sup>42</sup>  | Y      | Y      | N      | Y      | Y      | N      | Y      | CT     | Y      |
| Dai,2017 <sup>55</sup>  | Y      | CT     | CT     | Y      | Y      | Y      | CT     | CT     | Y      |
| Zhou,2019 <sup>57</sup> | Y      | CT     | Y      | Y      | Y      | N      | CT     | CT     | Y      |
| Xu,2017 <sup>58</sup>   | Y      | Y      | Y      | Y      | Y      | Y      | CT     | CT     | Y      |

Key: Y=yes, N=no, CT=cannot tell. Item 1: Was the causal relationship in the study clearly stated? Item 2: Was the baseline comparable between the groups? Item 3: Were the other measures received by the groups the same, except for the intervention to be validated? Item 4: Was a control group established? Item 5: Were multidimensional measures of outcome indicators performed before and after the intervention? Item 6: Was follow-up complete, and if not, were missing visits reported and measures taken to address them? Item 7: Were the outcome indicators measured in the same way for all study groups? Item 8: Were the measures of outcome indicators reliable? Item 9: Were the data analysis methods appropriate?

1  
2  
3  
4  
5  
6  
7  
8  
9  
10  
11  
12  
13  
14  
15  
16  
17  
18  
19  
20  
21  
22  
23  
24  
25  
26  
27  
28  
29  
30  
31  
32  
33  
34  
35  
36  
37  
38  
39  
40  
41  
42  
43  
44  
45  
46

**Table3 Internet-based Support Interventions RCTs: study characteristics and results**

| Author/<br>year/<br>Country              | Sample<br>Size(I/C) | Intervention Description                                                                                                                                                                                                                                                                                                       | Intervention<br>characteristics                                                                   | Intervention Content<br>elements                                                        | Duration | Outcomes/<br>Measurements                                                                                                                           | Results                                                                                                                                                                                                                |
|------------------------------------------|---------------------|--------------------------------------------------------------------------------------------------------------------------------------------------------------------------------------------------------------------------------------------------------------------------------------------------------------------------------|---------------------------------------------------------------------------------------------------|-----------------------------------------------------------------------------------------|----------|-----------------------------------------------------------------------------------------------------------------------------------------------------|------------------------------------------------------------------------------------------------------------------------------------------------------------------------------------------------------------------------|
| Lally,<br>2020 <sup>16</sup><br>USA      | 43/57               | Name:Tailored self-mannagement<br>psychoeducational program<br>Structure: Five module of supportive<br>oncology-based psychoeducation and<br>cognitive-behavioral techniques, coping<br>skills, problem solving, communication<br>strategies, and validation.                                                                  | Delivery: Web<br>Self-guided:√<br>Automated reminders:×<br>Face-to-face contact: ×<br>Tailored: √ | Information support;<br>Psychological support;<br>Peer Support.                         | 12 weeks | 1.Psychological<br>distress ( DT ,<br>CES-D, IES)                                                                                                   | No significant outcomes.                                                                                                                                                                                               |
| Zhu,<br>2018 <sup>17</sup><br>China      | 57/57               | Name:Mobile Breast Cancer e-Support<br>Program<br>Structure: Learning Forum (information<br>related to breast cancer disease and<br>symptom management), Discussion<br>Forum (anonymous support group),<br>Consult an Expert (online consultation),<br>and Personal Stories (interview stories<br>of breast cancer survivors). | Delivery: APP<br>Self-guided:×<br>Automated reminders:×<br>Face-to-face contact: ×<br>Tailored:×  | Information support;<br>Interaction with health care<br>professionals;<br>Peer Support; | 3 months | 1.QOL<br>(FACT-B)<br>2.Symptom<br>distress(MDASI)<br>3.Self-efficacy(SIC<br>PA)<br>4. Social<br>support(MSPSS)<br>5.Anxiety and<br>depression(HADS) | 1. 6.64; 95%<br>CI 0.77-12.50; P=0.03,<br>d=0.46<br>2. -0.73; 95% CI -1.35 to<br>-0.11; P=.002;d=-0.51<br>3. 21.05; 95% CI<br>1.87-40.22; P=0.03; d=0.53<br>4. No significant outcomes.<br>5. No significant outcomes. |
| Korkmaz,<br>2020 <sup>18</sup><br>Turkey | 24/24/<br>24        | Name: A web-based education program<br>Structure: provides education or coach to<br>breast cancer patients in the<br>pre-operative and post-operative<br>process.                                                                                                                                                              | Delivery: Web<br>Self-guided:√<br>Automated reminders:×<br>Face-to-face contact: ×<br>Tailored: × | Information support                                                                     | 1 month  | 1.Anxiety<br>(STAI)<br>2.QOL(SF 36)                                                                                                                 | 1.P<0.05<br>2.P<0.05                                                                                                                                                                                                   |

**Table 3 Internet-based Support Interventions RCTs: study characteristics and results**

| Author/<br>year/<br>Country                    | Sample<br>Size(I/C) | Intervention Description                                                                                                                                                                                                         | Intervention<br>characteristics                                                                                            | Intervention Content<br>elements                                                          | Duration  | Outcomes/<br>Measurements                                                    | Results                                                                         |
|------------------------------------------------|---------------------|----------------------------------------------------------------------------------------------------------------------------------------------------------------------------------------------------------------------------------|----------------------------------------------------------------------------------------------------------------------------|-------------------------------------------------------------------------------------------|-----------|------------------------------------------------------------------------------|---------------------------------------------------------------------------------|
| White,<br>2018 <sup>19</sup><br>Australia      | 177<br>/202         | Name: An information-based, breast cancer specific website<br>Structure: information module, emotional responses, support services, family responses and life after cancer, a diary.                                             | Delivery: Web<br>Self-guided: √<br>Automated reminders: √<br>Face-to-face contact: ×<br>Tailored: ×                        | Information support;<br>Psychological support                                             | 6 months  | 1. Anxiety and Depression (HADS)<br>2. QOL (FACT-B)                          | 1. No significant outcomes.<br>2. T1-T2 ( $\chi^2_{df=1} = 6.46$ , $p = 0.01$ ) |
| Admiraal,<br>2017 <sup>20</sup><br>Netherlands | 69/69               | Name: Tailored self-management psychoeducational program<br>Structure: 1) problem orientation; and 2) fully automated and customized psychoeducation for reported problems; and 3) resources and services for reported problems. | Delivery: Web<br>Self-guided: √<br>Automated reminders: ×<br>Face-to-face contact: ×<br>Tailored: √                        | Information support;<br>Psychological support.                                            | 12 weeks  | 1. QOL (EORTC QLQ-C30 and the QLQ-BR23)<br>2. Psychological distress (DT/PL) | No significant outcomes.                                                        |
| Ventura,<br>2017 <sup>21</sup><br>Sweden       | 121/105             | Name: Swedish Interactive Rehabilitation Information program<br>Structure: Includes links to web pages and lectures last for 4 hours about two modules: medical issues arising and psycho-social aspects.                        | Delivery: A computer-based programme<br>Self-guided: ×<br>Automated reminders: ×<br>Face-to-face contact: ×<br>Tailored: × | Information support                                                                       | 9 months  | 1. Anxiety and depression (HADS)<br>2. Self-efficacy (CHESS)                 | No significant outcomes.                                                        |
| Wheelock,<br>2015 <sup>22</sup><br>USA         | 41/59               | Name: A Web-Based System for Symptom Management<br>Structure: 3 routine clinic follow-up appointments, self-reported symptoms, with                                                                                              | Delivery: Web+ computer system<br>Self-guided: ×<br>Automated reminders: ×                                                 | Information support;<br>Symptom management;<br>Interaction with health care professionals | 18 months | Symptom prevalence (Patients self-reported)                                  | 7.36 vs 3.2;<br>P=0.0045                                                        |

1  
2  
3  
4  
5  
6  
7  
8  
9  
10  
11  
12  
13  
14  
15  
16  
17  
18  
19  
20  
21  
22  
23  
24  
25  
26  
27  
28  
29  
30  
31  
32  
33  
34  
35  
36  
37  
38  
39  
40  
41  
42  
43  
44  
45  
46

**Table 3 Internet-based Support Interventions RCTs: study characteristics and results**

| Author/<br>year/<br>Country            | Sample<br>Size(I/C) | Intervention Description                                                                                                                                                                                                                                                                                                                                                                                                                                   | Intervention<br>characteristics                                                                                                              | Intervention Content<br>elements                                                                                                                            | Duration | Outcomes/<br>Measurements                                       | Results                                                                      |
|----------------------------------------|---------------------|------------------------------------------------------------------------------------------------------------------------------------------------------------------------------------------------------------------------------------------------------------------------------------------------------------------------------------------------------------------------------------------------------------------------------------------------------------|----------------------------------------------------------------------------------------------------------------------------------------------|-------------------------------------------------------------------------------------------------------------------------------------------------------------|----------|-----------------------------------------------------------------|------------------------------------------------------------------------------|
| Wheelock,<br>2015 <sup>22</sup><br>USA |                     | review by nurse practitioners, targeted education and triage.                                                                                                                                                                                                                                                                                                                                                                                              | Face-to-face contact: ×<br>Tailored:√                                                                                                        |                                                                                                                                                             |          |                                                                 |                                                                              |
| Du,2021 <sup>23</sup><br>China         | 40/40               | Name:Follow-up management intervention based on clinical decision support system<br>Structure: fills in the corresponding health status evaluation sheet, the system automatically interprets the results of the evaluation sheet and triggers an abnormal state alarm, the normal state gives a follow-up/treatment reminder, and the abnormal state pushes related health education courses or intervention from medical staff.                          | Delivery: A full-process information management system<br>Self-guided: ×<br>Automated reminders: √<br>Face-to-face contact: ×<br>Tailored: √ | Information support;<br>Symptom management;<br>Interaction with health care professionals.                                                                  | 6 months | 1.Symptom severity (myelosuppression)<br>2.Self-efficacy(SUPPH) | 1. P<0.05<br>2. P<0.05                                                       |
| Hou,<br>2020 <sup>24</sup><br>Taiwan   | 59/53               | Name:A Self-Management Support mHealth App Intervention<br>Structure: eight main features(1) evidence or knowledge about breast cancer, (2) exercise and rehabilitation after surgery, (3) diet and nutrition for breast cancer patients, (4) emotional support to prevent anxiety and depression, (5) personal health records to track treatment and side effects, (6)information on social resources, (7) experience sharing, and (8) expert consulting. | Delivery: APP<br>Self-guided:√<br>Automated reminders:√<br>Face-to-face contact: ×<br>Tailored: ×                                            | Information support;<br>Symptom management;<br>Behavior management<br>Psychological support;<br>Interaction with health care professionals;<br>Peer support | 3 months | 1.QOL(QLQ-C30 and QLQ-BR23)                                     | 83.45 vs 82.23,<br>P=0.03(QLQ-C30) ;<br>265.53 vs63.13,<br>P=0.04 (QLQ-BR23) |
| Graetz,<br>2018 <sup>25</sup><br>USA   | 25/23               | Name: A mobile app for managing adverse symptoms.<br>Structure: test the use of the app designed with and without weekly reminders for patients to report real-time                                                                                                                                                                                                                                                                                        | Delivery: APP<br>Self-guided:√<br>Automated reminders:√                                                                                      | Information support<br>Symptom management;<br>Behavior management                                                                                           | 8 weeks  | Symptom distress(FACT-ES)                                       | No significant outcomes.                                                     |



Table 3 Internet-based Support Interventions RCTs: study characteristics and results

| Author/<br>year/<br>Country            | Sample<br>Size(I/C) | Intervention Description                                                                                                                                                                                                                                                                                      | Intervention<br>characteristics                                                                                                               | Intervention Content<br>elements                                                           | Duration | Outcomes/<br>Measurements                        | Results                                                                                                                                                             |
|----------------------------------------|---------------------|---------------------------------------------------------------------------------------------------------------------------------------------------------------------------------------------------------------------------------------------------------------------------------------------------------------|-----------------------------------------------------------------------------------------------------------------------------------------------|--------------------------------------------------------------------------------------------|----------|--------------------------------------------------|---------------------------------------------------------------------------------------------------------------------------------------------------------------------|
| Fjell,<br>2020 <sup>26</sup><br>Sweden | 75/74               | symptoms and AI use outside of clinic visits with built-in alerts to patients' oncology providers.<br>Name: An interactive app intervention<br>Structure: symptom self-reporting, an alert system for contacting health care professionals, access to self-care advice and a visual chart of symptom history. | Face-to-face contact: ×<br>Tailored: √<br>Delivery: APP<br>Self-guided: √<br>Automated reminders: √<br>Face-to-face contact: ×<br>Tailored: √ | Information support;<br>Symptom management;<br>Interaction with health care professionals. | 2 weeks  | 1.QOL(EORTC QLQ-C30)<br>2.Symptom Distress(MSAS) | 1. Emotional functioning (P =0.008);<br>nausea and vomiting (P =0.007), appetite loss (P=0.027), constipation (P =0 .007),<br>2.P =0.033, Effect size(0.26 to 0.34) |
| Handa,<br>2020 <sup>27</sup><br>Japan  | 52/50               | Name: A breast cancer patient support system application.<br>Structure: record the patient's subjective and objective symptoms by time and number, provides tips for self-care, including advice on when the patient should go for checkups, and ways to manage side effects                                  | Delivery: APP<br>Self-guided: √<br>Automated reminders: ×<br>Face-to-face contact: ×<br>Tailored: ×                                           | Information support;<br>Symptom management;                                                | 12 weeks | Anxiety and depression(HADS)                     | No significant outcomes.                                                                                                                                            |
| Rosen,<br>2018 <sup>28</sup><br>USA    | 55/57               | Name: App-delivered mindfulness training (AMT) intervention<br>Structure: Includes techniques for calming meditation (eg, focus on the breath) and.                                                                                                                                                           | Delivery: APP<br>Self-guided: √<br>Automated reminders: ×                                                                                     | Information support;<br>Psychological support.                                             | 8 weeks  | 1.QOL (FACT-B)                                   | t(258.40) =3.09,<br>P < 0.01, 95% CI[2.71, 11.90]                                                                                                                   |

Table 3 Internet-based Support Interventions RCTs: study characteristics and results

| Author/<br>year/<br>Country             | Sample<br>Size(I/C) | Intervention Description                                                                                                                                                                                                                                                                                                                    | Intervention<br>characteristics                                                                                                                  | Intervention<br>Content elements                                                                               | Duration | Outcomes/<br>Measurements                             | Results                                                 |
|-----------------------------------------|---------------------|---------------------------------------------------------------------------------------------------------------------------------------------------------------------------------------------------------------------------------------------------------------------------------------------------------------------------------------------|--------------------------------------------------------------------------------------------------------------------------------------------------|----------------------------------------------------------------------------------------------------------------|----------|-------------------------------------------------------|---------------------------------------------------------|
| Zhou,<br>2019 <sup>29</sup><br>China    | 66/66               | insight meditation (eg, cultivating awareness, insight, and compassion)<br>Name:Cyclic adjustment training intervention<br>Structure: relaxed deep breath training; music listening; anti-cancer stories reading/ listening/watching; adjust experiences and feelings sharing with peers;be instructed to self-ask the following questions. | Face-to-face contact: ×<br>Tailored: ×<br>Delivery: Wechat<br>Self-guided: ×<br>Automated reminders: ×<br>Face-to-face contact: √<br>Tailored: × | Information support;<br>Psychological support;<br>Interaction with health care professionals;<br>Peer Support  | 12 weeks | 1.Depression (SDS)<br>2.Anxiety(SA S)                 | 1.F = 26.32,<br>P < 0.001<br>2.F = 31.85,<br>P < 0.001  |
| Zhou,<br>2020 <sup>30</sup><br>China    | 55/56               | Name:WeChat-based multi-modal nursing program<br>Structure: provision of information, training, support, and counseling centered and oriented to the needs of breast cancer patients, involving physical, psychological, and social adjustment distress.                                                                                    | Delivery: WeChat<br>Self-guided: ×<br>Automated reminders: ×<br>Face-to-face contact: √<br>Tailored: ×                                           | Information support;<br>Psychological support;<br>Interaction with health care professionals;<br>Peer Support. | 6 months | 1.QOL (FACT-B)<br>2.Pain/fatigue/ sleep symptom (NRS) | 1.F = 16.28,<br>P < 0.001<br>2. No significant outcomes |
| Foley,<br>2016 <sup>31</sup><br>Ireland | 26/13               | Name:Patient accessed tailored information Intervention<br>Structure: tailored surgical information pertaining to individual patients and the scripts were reviewed by the National Adult Literacy Agency (NALA) and contain basic breast cancer biology, the different treatments used and surgical techniques.                            | Delivery: APP<br>Self-guided:√<br>Automated reminders: ×<br>Face-to-face contact: ×<br>Tailored: √                                               | Information support                                                                                            | 2 weeks  | 1.Anxiety and depression (HADS)                       | 1.P=0.022 (anxiety)<br>P=0.029 (depression)             |

**Table 3 Internet-based Support Interventions RCTs: study characteristics and results**

| Author/<br>year/<br>Country                 | Sample<br>Size(I/C) | Intervention Description                                                                                                                                                                                                                                                                               | Intervention<br>characteristics                                                                        | Intervention Content<br>elements                                                                               | Duration  | Outcomes/<br>Measurements                                      | Results                                                                                                          |
|---------------------------------------------|---------------------|--------------------------------------------------------------------------------------------------------------------------------------------------------------------------------------------------------------------------------------------------------------------------------------------------------|--------------------------------------------------------------------------------------------------------|----------------------------------------------------------------------------------------------------------------|-----------|----------------------------------------------------------------|------------------------------------------------------------------------------------------------------------------|
| Wang,<br>2019 <sup>32</sup><br>China        | 44/44               | Name: Continuous rehabilitation nursing support intervention<br>Structure: knowledge sharing, health consultations, sharing of feelings and experiences between patients, relax training; cope with negative emotions                                                                                  | Delivery: Wechat<br>Self-guided: ×<br>Automated reminders: ×<br>Face-to-face contact: ×<br>Tailored: × | Information support;<br>Psychological support;<br>Interaction with health care professionals;<br>Peer support. | 6 months  | 1.QOL(FACT-B)<br>2.Pain, fatigue, and sleep severity(NRS)      | 1.P<0.001<br>2. No significant outcomes                                                                          |
| Sherman,<br>2018 <sup>33</sup><br>Australia | 155/149             | Name:Structured Online Writing Exercise Intervention<br>Structure: Individuals could describe their deepest thoughts and emotions with specific prompts focused on self-compassion according to a modified Expressive Writing prompt.                                                                  | Delivery: web<br>Self-guided: √<br>Automated reminders: ×<br>Face-to-face contact: ×<br>Tailored: ×    | Psychological support                                                                                          | NA        | 1.Anxiety and depression (DASS)<br>2. Body image distress(BIS) | 1.P=0 .001 (depression);<br>P=0.007 (Anxiety)<br>2. P=0.035                                                      |
| Villani,<br>2018 <sup>34</sup><br>Italy     | 14/15               | Name:E-health Stress Inoculation Training (SIT) intervention<br>Structure: face-to-face counseling with a psychologist, live videos simulating the chemotherapy process, watching live video interviews with women who have experienced breast cancer, relaxation videos with guided meditation audio. | Delivery:Web<br>Self-guided: ×<br>Automated reminders:×<br>Face-to-face contact:√<br>Tailored: ×       | Psychological support;<br>Interaction with health care professionals;<br>Peer Support                          | 3 months  | 1.QOL (FACT-B)<br>2. Emotional Depression (ERQ)                | 1. P<0.05 (3 months after the end of the intervention)<br>2. P<0.05 (3 months after the end of the intervention) |
| Liu, 2019 <sup>35</sup><br>China            | 50/50               | Name: Innovative Follow-Up Intervention<br>Structure: Provide preoperative rehabilitation                                                                                                                                                                                                              | Delivery: Wechat<br>Self-guided: ×                                                                     | Information support;<br>Behavior management;                                                                   | 12 months | Self-efficacy(GSES )                                           | P<0.05                                                                                                           |

**Table 3 Internet-based Support Interventions RCTs: study characteristics and results**

| Author/<br>year/<br>Country                   | Sample<br>Size(I/C) | Intervention Description                                                                                                                                                                                                                                                                                                               | Intervention<br>characteristics                                                                                                                                         | Intervention Content<br>elements                                                                                                                            | Duration | Outcomes/<br>Measurements                            | Results                  |
|-----------------------------------------------|---------------------|----------------------------------------------------------------------------------------------------------------------------------------------------------------------------------------------------------------------------------------------------------------------------------------------------------------------------------------|-------------------------------------------------------------------------------------------------------------------------------------------------------------------------|-------------------------------------------------------------------------------------------------------------------------------------------------------------|----------|------------------------------------------------------|--------------------------|
| Kim,<br>2020 <sup>36</sup><br>North-<br>Korea |                     | guidance, discharge follow-up form and endocrine medication survey form, health consultation.<br>Name: A web-based expert support self-management program (WEST)<br>Structure: keep a health diary, self-diagnose lifestyle, learn health information and receive individualized feedback from a nurse, phone counseling with experts. | Automated reminders: ×<br>Face-to-face contact: ×<br>Tailored: ×<br>Delivery: APP<br>Self-guided: √<br>Automated reminders: ×<br>Face-to-face contact: ×<br>Tailored: √ | Interaction with health care professionals;<br>Peer support.<br>Information support;<br>Behavior management;<br>Interaction with health care professionals. | 6 months | Self-efficacy (Health-specific self-efficacy scales) | No significant outcomes. |
| Im,<br>2020 <sup>38</sup> USA                 | 66/49               | Name: Technology-Based Information and Coaching/<br>Support Program on Pain and Symptoms<br>Structure: online knowledge or education with cultural characteristics, online assistance resources, group and one-on-one guidance in the form of online forums on the website                                                             | Delivery: Web<br>Self-guided: ×<br>Automated reminders: ×<br>Face-to-face contact: ×<br>Tailored: √                                                                     | Information support;<br>Interaction with health care professionals;<br>Peer Support                                                                         | 3 months | 1.Symptom distress(MSAS-SF)                          | P=0.0229                 |
| Wang,<br>2019 <sup>39</sup><br>China          | 75/74\              | Name: Specialized case management intervention<br>Structure: Establish case management files, push the answers to patient questions, share knowledge, remind and supervise the implementation of the patient's personal plan daily, including medication, symptoms, and weight.                                                        | Delivery: Wechat<br>Self-guided: ×<br>Automated reminders: ×<br>Face-to-face contact: ×<br>Tailored: ×                                                                  | Information support;<br>Interaction with health care professionals;<br>Peer support.                                                                        | 9 months | Symptom severity(CTCAE)                              | P<0.05                   |

**Table 3 Internet-based Support Interventions RCTs: study characteristics and results**

| Author/<br>year/<br>Country                  | Sample<br>Size(I/C) | Intervention Description                                                                                                                                                                                                                                                                     | Intervention<br>characteristics                                                                        | Intervention Content<br>elements                                                                               | Duration  | Outcomes/<br>Measurements                                                                             | Results                                                                                  |
|----------------------------------------------|---------------------|----------------------------------------------------------------------------------------------------------------------------------------------------------------------------------------------------------------------------------------------------------------------------------------------|--------------------------------------------------------------------------------------------------------|----------------------------------------------------------------------------------------------------------------|-----------|-------------------------------------------------------------------------------------------------------|------------------------------------------------------------------------------------------|
| Visser,<br>2018 <sup>40</sup><br>Netherlands | 50/59               | Name: Group medical consultations (GMCs) and tablet-based online support group sessions<br>Structure: a face-to-face GMC and an online app, consisting of three tablet-based video GMCs, email, videos and additional information.                                                           | Delivery: APP<br>Self-guided: ×<br>Automated reminders: √<br>Face-to-face contact: ×<br>Tailored: √    | Information support;<br>Interaction with health care professionals;<br>Peer Support.                           | 3 months  | 1. Psychological distress (SCL-90)                                                                    | No significant outcomes                                                                  |
| Peng, 2020 <sup>41</sup><br>China            | 59/58               | Name: Online and offline rehabilitation intervention<br>Structure: online and offline rehabilitation volunteer support activities, Case management file establishment and offline rehabilitation guidance, online rehabilitation knowledge guidance and rehabilitation consultation and Q&A. | Delivery: Wechat<br>Self-guided: ×<br>Automated reminders: ×<br>Face-to-face contact: √<br>Tailored: × | Information support;<br>Psychological support;<br>Interaction with health care professionals;<br>Peer support. | 12 months | 1. QOL (QLQ-BR53)<br>2. Body image distress (BIS)                                                     | 1. P < 0.05<br>2. P < 0.05                                                               |
| Chee,<br>2016 <sup>56</sup><br>USA           | 30/35               | Name: A culturally tailored Internet cancer support group<br>Structure: (a) interactive online message board by moderated a Registered Nurse; (b) interactive online evidence-based educational sessions; and (c) online resources.                                                          | Delivery: Web<br>Self-guided: ×<br>Automated reminders: ×<br>Face-to-face contact: ×<br>Tailored: ×    | Information support;<br>Interaction with health care professionals;<br>Peer support                            | 1 month   | 1. QoL (FACT-B)<br>2. Symptom distress (MSAS-SF)<br>3. Social support (PRQ)<br>4. self-efficacy (CBI) | 1. P < 0.10<br>2. P < 0.10<br>3. No significant outcomes.<br>4. No significant outcomes. |
| Wang, 2017 <sup>59</sup>                     | 320/                | Name: Continuous nursing intervention                                                                                                                                                                                                                                                        | Delivery: APP                                                                                          | Information support;                                                                                           | 2 weeks   | 1. QOL (QLSBC)                                                                                        | 1. P < 0.01                                                                              |

1  
2  
3  
4  
5  
6  
7  
8  
9  
10  
11  
12  
13  
14  
15  
16  
17  
18  
19  
20  
21  
22  
23  
24  
25  
26  
27  
28  
29  
30  
31  
32  
33  
34  
35  
36  
37  
38  
39  
40  
41  
42  
43  
44  
45  
46

China 318/ Structure: regularly provides the service like Self-guided: × Symptom management; 2. Anxiety and 2.P<0.01

**Table3 Internet-based Support Interventions RCTs: study characteristics and results**

| Author/<br>year/<br>Country                   | Sample<br>Size(I/C) | Intervention Description                                                                                                                                                                                                                                                                                                                        | Intervention<br>characteristics                                                                     | Intervention Content<br>elements                                                          | Duration | Outcomes/<br>Measurements                             | Results                                                       |
|-----------------------------------------------|---------------------|-------------------------------------------------------------------------------------------------------------------------------------------------------------------------------------------------------------------------------------------------------------------------------------------------------------------------------------------------|-----------------------------------------------------------------------------------------------------|-------------------------------------------------------------------------------------------|----------|-------------------------------------------------------|---------------------------------------------------------------|
| Wang,<br>2017 <sup>59</sup><br>China          |                     | medical information, care reminders, health monitoring and health education                                                                                                                                                                                                                                                                     | Automated reminders: ×<br>Face-to-face contact: ×<br>Tailored: ×                                    | Interaction with health care professionals;<br>Peer support.                              |          | depression(EESS)<br>3.Prevalence of adverse reactions | 3.P<0.05                                                      |
| Li,2018 <sup>60</sup><br>China                | 60/60               | Name: Management of chemotherapy adverse events<br>Structure: information support, Alert for chemotherapy adverse events, personalized management from a case manager or multidisciplinary expert, SMS alert feedback.                                                                                                                          | Self-guided: √<br>Automated reminders: √<br>Face-to-face contact: ×<br>Tailored: √                  | Information support;<br>Symptom management;<br>Interaction with health care professionals | 2 weeks  | 1.QOL(FACT-B)<br>2.Symptom prevalence(CTCA E,v4.0)    | 1. P<0.05<br>2. P<0.05                                        |
| Chen,<br>2015 <sup>61</sup><br>China          | 45/45               | Name:Tracking intervention based on network information platform<br>Structure: Through the system, follow-up nurses participate in the diagnosis and treatment process of the patient during the hospitalization process,provide post-discharge patient greetings, rehabilitation guidance, reminders for follow-up and other nursing services. | Delivery: Web<br>Self-guided: ×<br>Automated reminders: √<br>Face-to-face contact: √<br>Tailored: × | Information support;<br>Interaction with health care professionals<br>Peer support        | 3 months | 1.QOL(FACT-B)<br>2. Depression(CES-D)                 | 1.P<0.05<br>2. P<0.01                                         |
| Egbring,<br>2016 <sup>62</sup><br>Switzerland | 46/49/<br>44        | Name: a mobile and Web-based app to record daily functional activity and adverse events.<br>Structure: record functional activity and adverse events , and collaborate with physicians in the monitoring and review of patient-reported                                                                                                         | Delivery: APP<br>Self-guided: √<br>Automated reminders:×<br>Face-to-face contact: ×<br>Tailored: ×  | Information support;<br>Symptom management;<br>Interaction with health care professionals | 42 days  | Symptom prevalence (Patients self-reported)           | n=1033(supervised APP group) vs n=656 (Questionnaire group) ; |

1  
2  
3  
4  
5 symptoms.  
6  
7  
8  
9  
10  
11  
12  
13  
14  
15  
16  
17  
18  
19  
20  
21  
22  
23  
24  
25  
26  
27  
28  
29  
30  
31  
32  
33  
34  
35  
36  
37  
38  
39  
40  
41  
42  
43  
44  
45  
46

---

---

For peer review only

1  
2  
3  
4  
5  
6  
7  
8  
9  
10  
11  
12  
13  
14  
15  
16  
17  
18  
19  
20  
21  
22  
23  
24  
25  
26  
27  
28  
29  
30  
31  
32  
33  
34  
35  
36  
37  
38  
39  
40  
41  
42  
43  
44  
45  
46

**Table 4 Internet-based Support Interventions Quasi-experiment studies: study characteristics and results**

| Author/year / Country            | Sample Size (I/C) | Intervention Description                                                                                                                                                                                                                                                                                | Intervention characteristics                                                                           | Intervention Content elements                                                                              | Duration  | Outcomes/ Measurements                                                                          | Results                                          |
|----------------------------------|-------------------|---------------------------------------------------------------------------------------------------------------------------------------------------------------------------------------------------------------------------------------------------------------------------------------------------------|--------------------------------------------------------------------------------------------------------|------------------------------------------------------------------------------------------------------------|-----------|-------------------------------------------------------------------------------------------------|--------------------------------------------------|
| Li,2017 <sup>37</sup><br>China   | 48/58             | Name: Continuous nursing intervention<br>Structure: Includes 3 sections: Rehabilitation Encyclopedia, Personal Center, and Q&A. Rehabilitation Encyclopedia, including diet, exercise, sleep, drugs, psychology and other rehabilitation knowledge. Personal center records patient health files.       | Delivery: Wechat<br>Self-guided: ×<br>Automated reminders: ×<br>Face-to-face contact: ×<br>Tailored: √ | Information support;<br>Behavior management;<br>Interaction with health care professionals<br>Peer support | 4 weeks   | 1.QOL(EORTC QLQ-C30)<br>2. Anxiety(HAMA)<br>3.Depression(HAMD)<br>4.Cancer-related fatigue(BFI) | 1. P<0.05<br>2. P<0.05<br>3. P<0.05<br>4. P<0.05 |
| Yue,2020 <sup>42</sup><br>China  | 148/146           | Name:"Internet +" nursing mode intervention<br>Structure: "Music Oxygen Bar" group activities, case managers tailor-made family rehabilitation plan for patients, wechat provides postoperative rehabilitation knowledge and video, medical consultation, Healing Music and social support.             | Delivery: Wechat<br>Self-guided: ×<br>Automated reminders: ×<br>Face-to-face contact: ×<br>Tailored: × | Information support;<br>Interaction with health care professionals;<br>Peer support                        | 12 months | Lymphedem symptom distress and severity(BCLE-SEI)                                               | P<0.05                                           |
| Dai,2017 <sup>55</sup><br>China  | 47/42             | Name: Intervention based on nurse-patient communication platform<br>Structure: knowledge sharing, health counseling and one-on-one chat (responsible nurse communicates with 3 to 5 patients via personal WeChat ID)                                                                                    | Delivery: Wechat<br>Self-guided: ×<br>Automated reminders: ×<br>Face-to-face contact: ×<br>Tailored: × | Information support;<br>Interaction with health care professionals;<br>Peer support                        | 6 months  | 1.QOL(QLQ-C30)<br>2. Cancer-related fatigue(BFI)                                                | 1. p<0.01<br>2. p<0.05                           |
| Zhou,2019 <sup>57</sup><br>China | 153/145           | Name:Hospital-family collaborative transitional care intervention<br>Structure: provides breast cancer postoperative function exercise method video, rehabilitation knowledge, health lecture activities and expert consultation activities notice, outpatient doctor sitting arrangements daily, shift | Delivery: Wechat<br>Self-guided: ×<br>Automated reminders: ×<br>Face-to-face contact: ×<br>Tailored: × | Information support;<br>Interaction with health care professionals;<br>Peer support                        | 6 months  | 1.QOL(FACT-B)<br>2. lymphedema symptom severity (Circumferential method)                        | 1. P<0.01<br>2. P<0.001                          |



**Table 4 Internet-based Support Interventions Quasi-experiment studies: study characteristics and results**

| Author/year/<br>Country          | Sample<br>Size<br>(I/C) | Intervention Description                                                                                                                                                                                                        | Intervention<br>characteristics                                                                            | Intervention Content<br>elements                                                           | Duration | Outcomes/<br>Measurements                                  | Results                                |
|----------------------------------|-------------------------|---------------------------------------------------------------------------------------------------------------------------------------------------------------------------------------------------------------------------------|------------------------------------------------------------------------------------------------------------|--------------------------------------------------------------------------------------------|----------|------------------------------------------------------------|----------------------------------------|
| Zhou,2019 <sup>57</sup><br>China |                         | nurses conduct WeChat group visits                                                                                                                                                                                              |                                                                                                            |                                                                                            |          |                                                            |                                        |
| Xu,2017 <sup>58</sup><br>China   | 75/75                   | Name:An Internet and mobile phone-based case management program<br>Structure: Mobile Internet technology is applied to postoperative case management in breast cancer patients in education, follow-up and remote consultation. | Delivery: App+Wechat<br>Self-guided: ×<br>Automated reminders: ×<br>Face-to-face contact: ×<br>Tailored: × | Information support;<br>Symptom management;<br>Interaction with health care professionals. | 2 months | 1. QOL(FACT-B)<br>2.Postoperative complications prevalence | 1.P<0.05<br>2. No significant outcomes |

**Abbreviations:** I/C:C, Control group; I, Intervention group; NA: Not Available; BIS, Body Image Scale; BCLE-SEI, Breast Cancer and Lymphedema Symptom Experience Index; BIS, 10-item Body Image Scale; BFI, Brief Fatigue Inventory ;CTCAE,Common Terminology Criteria for Adverse Events; CBI,Cancer Behavior Inventory; CES-D, Center for Epidemiological Survey-Depression Scale; DASS-21,The Depression Anxiety Stress Scale-21item; EORTC QLQ-C30, The European Organization for Research and Treatment of Cancer quality of life questionnaire-core 30 ;QLQ-BR23, The European Organization for Research and Treatment of Cancer quality of life questionnaire-breast cancer module 23;ERQ, The Emotion Regulation Questionnaire; EESS, Eysenck Emotional Stability Scale; FACT-B, Functional Assessment of Cancer Treatment-B; FACT-ES ,Functional Assessment of Cancer Therapy-Endocrine Symptoms; GSES, General Self-Efficacy Scale; HADS,The Hospital Anxiety and Depression Scale; HAMA, Hamilton Anxiety Scale; HAMD, Hamilton Depression Scale; MSAS-SF, The Memorial Symptom Assessment Scale–Short Form; MDASI, MD Anderson Symptom Inventory, PRQ, Personal Resource Questionnaire; QLSBCquality of life scale of breast cancer; SICPA, Stanford Inventory of Cancer Patient Adjustment; SCL-90, the Symptom Checklist-90; SAS, Self-Rating Anxiety Scale; SDS, Self-Rating Depression Scale; STAI, The State-Trait Anxiety Inventory; SUPPH, Strategies Used by People to Promote Health; NRS, Numerical rating scale

1  
2  
3  
4  
5  
6  
7  
8  
9  
10  
11  
12  
13  
14  
15  
16  
17  
18  
19  
20  
21  
22  
23  
24  
25  
26  
27  
28  
29  
30  
31  
32  
33  
34  
35  
36  
37  
38  
39  
40  
41  
42  
43  
44  
45  
46

## References

1. Siegel RL, Miller KD, Jemal A. Cancer Statistics, 2017. *CA: a cancer journal for clinicians* 2017;67(1):7-30. doi: 10.3322/caac.21387 [published Online First: 2017/01/06]
2. Sung H, Ferlay J, Siegel RL, et al. Global Cancer Statistics 2020: GLOBOCAN Estimates of Incidence and Mortality Worldwide for 36 Cancers in 185 Countries. *CA: a cancer journal for clinicians* 2021;71(3):209-49. doi: 10.3322/caac.21660 [published Online First: 2021/02/05]
3. Desantis CE, Ma J, Gaudet MM, et al. Breast cancer statistics, 2019. *CA: a cancer journal for clinicians* 2019;69(6)
4. Khan F, Amatya B, Pallant JF, et al. Factors associated with long-term functional outcomes and psychological sequelae in women after breast cancer. *Breast* 2012;21(3):314-20. doi: 10.1016/j.breast.2012.01.013 [published Online First: 2012/02/22]
5. Mehnert A, Koch U. Prevalence of acute and post-traumatic stress disorder and comorbid mental disorders in breast cancer patients during primary cancer care: a prospective study. *Psycho-oncology* 2007;16(3):181-8. doi: 10.1002/pon.1057 [published Online First: 2006/07/21]
6. Gorini A, Mazzocco K, Gandini S, et al. Development and psychometric testing of a breast cancer patient-profiling questionnaire. *Breast cancer (Dove Medical Press)* 2015;7:133-46. doi: 10.2147/bctt.s80014 [published Online First: 2015/06/13]
7. Bouma G, Admiraal JM, de Vries EG, et al. Internet-based support programs to alleviate psychosocial and physical symptoms in cancer patients: a literature analysis. *Critical reviews in oncology/hematology* 2015;95(1):26-37. doi: 10.1016/j.critrevonc.2015.01.011 [published Online First: 2015/02/24]
8. Fiszer C, Dolbeault S, Sultan S, et al. Prevalence, intensity, and predictors of the supportive care needs of women diagnosed with breast cancer: a systematic review. *Psycho-oncology* 2014;23(4):361-74. doi: 10.1002/pon.3432 [published Online First: 2014/03/29]
9. Smith A, Hyde YM, Stanford D. Supportive care needs of cancer patients: A literature review. *Palliative & supportive care* 2015;13(4):1013-7. doi: 10.1017/s1478951514000959 [published Online First: 2014/08/16]
10. Lou Y, Yates P, McCarthy A, et al. Fatigue self-management: a survey of Chinese cancer patients undergoing chemotherapy. *Journal of clinical nursing* 2013;22(7-8):1053-65. doi: 10.1111/jocn.12174 [published Online First: 2013/03/14]
11. Chen YY, Guan BS, Li ZK, et al. Effect of telehealth intervention on breast cancer patients' quality of life and psychological outcomes: A meta-analysis. *J Telemed Telecare* 2018;24(3):157-67. doi: 10.1177/1357633x16686777 [published Online First: 2017/01/14]
12. Jansen F, van Uden-Kraan CF, van Zwieten V, et al. Cancer survivors' perceived need for supportive care and their attitude towards self-management and eHealth. *Supportive care in cancer : official journal of the Multinational Association of Supportive Care in Cancer* 2015;23(6):1679-88. doi: 10.1007/s00520-014-2514-7 [published Online First: 2014/11/27]
13. van de Poll-Franse LV, van Eenbergen MC. Internet use by cancer survivors: current use and future wishes. *Supportive care in cancer : official journal of the Multinational Association of Supportive Care in Cancer* 2008;16(10):1189-95. doi: 10.1007/s00520-008-0419-z [published Online First: 2008/02/23]

- 1  
2  
3  
4  
5 14. Cruz F, Vilela RA, Ferreira EB, et al. Evidence on the Use of Mobile Apps During the Treatment of Breast Cancer: Systematic Review. *JMIR Mhealth Uhealth* 2019;7(8):e13245. doi: 10.2196/13245 [published Online First: 2019/08/29]
- 6  
7  
8 15. Fridriksdottir N, Gunnarsdottir S, Zoëga S, et al. Effects of web-based interventions on cancer patients' symptoms: review of randomized trials. *Supportive care in cancer : official journal of the Multinational Association of Supportive Care in Cancer* 2018;26(2):337-51. doi: 10.1007/s00520-017-3882-6 [published Online First: 2017/09/19]
- 9  
10  
11 16. Lally RM, Kupzyk KA, Bellavia G, et al. CaringGuidance™ after breast cancer diagnosis eHealth psychoeducational intervention to reduce early post-diagnosis distress. *Supportive care in cancer : official journal of the Multinational Association of Supportive Care in Cancer* 2020;28(5):2163-74. doi: 10.1007/s00520-019-05028-0 [published Online First: 2019/08/16]
- 12  
13  
14 17. Zhu JM, Ebert L, Liu XY, et al. Mobile Breast Cancer e-Support Program for Chinese Women With Breast Cancer Undergoing Chemotherapy (Part 2): Multicenter Randomized Controlled Trial. *Jmir Mhealth and Uhealth* 2018;6(4) doi: 10.2196/mhealth.9438
- 15  
16  
17 18. Korkmaz S, Iyigun E, Tastan S. An Evaluation of the Influence of Web-Based Patient Education on the Anxiety and Life Quality of Patients Who Have Undergone Mammoplasty: a Randomized Controlled Study. *Journal of cancer education : the official journal of the American Association for Cancer Education* 2020;35(5):912-22. doi: 10.1007/s13187-019-01542-1 [published Online First: 2019/05/24]
- 18  
19  
20 19. White V, Farrelly A, Pitcher M, et al. Does access to an information-based, breast cancer specific website help to reduce distress in young women with breast cancer? Results from a randomised trial. *European journal of cancer care* 2018;27(6):e12897. doi: 10.1111/ecc.12897 [published Online First: 2018/08/24]
- 21  
22  
23 20. Admiraal JM, van der Velden AWG, Geerling JI, et al. Web-Based Tailored Psychoeducation for Breast Cancer Patients at the Onset of the Survivorship Phase: A Multicenter Randomized Controlled Trial. *Journal of pain and symptom management* 2017;54(4):466-75. doi: 10.1016/j.jpainsymman.2017.07.009 [published Online First: 2017/07/18]
- 24  
25  
26 21. Ventura F, Sawatzky R, Öhlén J, et al. Challenges of evaluating a computer-based educational programme for women diagnosed with early-stage breast cancer: a randomised controlled trial. *European journal of cancer care* 2017;26(5) doi: 10.1111/ecc.12534 [published Online First: 2016/06/25]
- 27  
28  
29 22. Wheelock AE, Bock MA, Martin EL, et al. SIS.NET: a randomized controlled trial evaluating a web-based system for symptom management after treatment of breast cancer. *Cancer* 2015;121(6):893-9. doi: 10.1002/cncr.29088 [published Online First: 2014/12/04]
- 30  
31  
32 23. Du Ping, Zhou Zheng, Lu Yao, et al. Application and effectiveness evaluation of clinical decision support in breast cancer follow-up management. *Chinese Nursing Management* 2021;21(01):110-15.
- 33  
34  
35 24. Hou IC, Lin HY, Shen SH, et al. Quality of Life of Women After a First Diagnosis of Breast Cancer Using a Self-Management Support mHealth App in Taiwan: Randomized Controlled Trial. *JMIR Mhealth Uhealth* 2020;8(3):e17084. doi: 10.2196/17084 [published Online First: 2020/03/05]
- 36  
37  
38  
39  
40  
41  
42  
43  
44  
45  
46

- 1  
2  
3  
4  
5 25. Graetz I, McKillop CN, Stepanski E, et al. Use of a web-based app to improve breast cancer symptom management and adherence for aromatase inhibitors: a  
6 randomized controlled feasibility trial. *Journal of cancer survivorship : research and practice* 2018;12(4):431-40. doi: 10.1007/s11764-018-0682-z [published Online  
7 First: 2018/03/02]  
8  
9 26. Fjell M, Langius-Eklöf A, Nilsson M, et al. Reduced symptom burden with the support of an interactive app during neoadjuvant chemotherapy for breast cancer - A  
10 randomized controlled trial. *Breast* 2020;51:85-93. doi: 10.1016/j.breast.2020.03.004 [published Online First: 2020/04/05]  
11  
12 27. Handa S, Okuyama H, Yamamoto H, et al. Effectiveness of a Smartphone Application as a Support Tool for Patients Undergoing Breast Cancer Chemotherapy: A  
13 Randomized Controlled Trial. *Clinical breast cancer* 2020;20(3):201-08. doi: 10.1016/j.clbc.2020.01.004  
14  
15 28. Rosen KD, Paniagua SM, Kazanis W, et al. Quality of life among women diagnosed with breast Cancer: A randomized waitlist controlled trial of commercially available  
16 mobile app-delivered mindfulness training. *Psycho-oncology* 2018;27(8):2023-30. doi: 10.1002/pon.4764 [published Online First: 2018/05/17]  
17  
18 29. Zhou KN, Li J, Li XM. Effects of cyclic adjustment training delivered via a mobile device on psychological resilience, depression, and anxiety in Chinese post-surgical  
19 breast cancer patients. *Breast Cancer Research and Treatment* 2019;178(1):95-103. doi: 10.1007/s10549-019-05368-9  
20  
21 30. Zhou K, Wang W, Zhao W, et al. Benefits of a WeChat-based multimodal nursing program on early rehabilitation in postoperative women with breast cancer: a clinical  
22 randomized controlled trial. *International journal of nursing studies* 2020;106:103565. doi: 10.1016/j.ijnurstu.2020.103565  
23  
24 31. Foley NM, O'Connell EP, Lehane EA, et al. PATI: Patient accessed tailored information: A pilot study to evaluate the effect on preoperative breast cancer patients of  
25 information delivered via a mobile application. *Breast* 2016;30:54-58. doi: 10.1016/j.breast.2016.08.012 [published Online First: 2016/09/10]  
26  
27 32. Wang Wen, Zhou Kaina, Zhao Wenqian, et al. Effect of internet-based continuous rehabilitation nursing support on health-related quality of life in postoperative  
28 chemotherapy patients with breast cancer. *Chinese Nursing Research* 2019;33(11):1821-26.  
29  
30 33. Sherman KA, Przewdziecki A, Alcorso J, et al. Reducing Body Image-Related Distress in Women With Breast Cancer Using a Structured Online Writing Exercise: Results  
31 From the My Changed Body Randomized Controlled Trial. *Journal of clinical oncology : official journal of the American Society of Clinical Oncology*  
32 2018;36(19):1930-40. doi: 10.1200/jco.2017.76.3318 [published Online First: 2018/04/25]  
33  
34 34. Villani D, Cognetta C, Repetto C, et al. Promoting Emotional Well-Being in Older Breast Cancer Patients: Results From an eHealth Intervention. *Frontiers in psychology*  
35 2018;9:2279. doi: 10.3389/fpsyg.2018.02279 [published Online First: 2018/12/13]  
36  
37 35. Liu Y, Liu SY, Feng DD, et al. Effect of an Innovative Follow-Up Technique on Improving the Resilience and Self-Efficacy in Patients with Breast Cancer during Endocrine  
38 Therapy(article in Chinese). *Journal of China Medical University* 2019;48(01):85-86.  
39  
40 36. Kim HJ, Kim HS. Effects of a web-based expert support self-management program (WEST) for women with breast cancer: A randomized controlled trial. *J Telemed*  
41 *Telecare* 2020;26(7-8):433-42. doi: 10.1177/1357633x19850386 [published Online First: 2019/05/18]  
42  
43  
44  
45  
46

- 1  
2  
3  
4  
5 37. Li Ling, Wu Miao, Li Shujing, et al. Influence of continuous intervention of WeChat on cancer related fatigue and negative emotion in patients after breast cancer  
6 operation. *Chinese Nursing Research* 2017;031(036):4675-77.
- 7  
8 38. Im EO, Kim S, Yang YL, et al. The efficacy of a technology-based information and coaching/support program on pain and symptoms in Asian American survivors of breast  
9 cancer. *cancer* 2020;126(3):670-80. doi: 10.1002/cncr.32579
- 10  
11 39. Zhaojin, W, Zhijuan, L, Hexing. M. Application effect of specialized case management based on WeChat mobile platform in extended service of breast cancer  
12 patients. *Chinese Nursing Research* 2019;33(03):524-27.
- 13  
14 40. Visser A, Prins JB, Jansen L, et al. Group medical consultations (GMCs) and tablet-based online support group sessions in the follow-up of breast cancer: A multicenter  
15 randomized controlled trial. *Breast* 2018;40:181-88. doi: 10.1016/j.breast.2018.05.012 [published Online First: 2018/06/16]
- 16  
17 41. Peng Cuie, Li Zan, Mao Huangxing, et al. Effect of online and offline rehabilitation intervention on upper limb function and body image of patients with breast  
18 reconstruction after breast cancer surgery. *Chinese Nursing Management* 2020;20(11):1637-42.
- 19  
20 42. Yue Chaoli, Xu Haiping, Sun Li, et al. The application effect of "Internet +" nursing mode intervention on lymphedema among postoperative patients with breast cancer.  
21 *Chinese Nursing Management* 2020;20(05):670-76.
- 22  
23 43. Steel JL, Geller DA, Kim KH, et al. Web-based collaborative care intervention to manage cancer-related symptoms in the palliative care setting. *Cancer*  
24 2016;122(8):1270-82. doi: 10.1002/cncr.29906 [published Online First: 2016/03/13]
- 25  
26 44. van den Berg SW, Gielissen MF, Custers JA, et al. BREATH: Web-Based Self-Management for Psychological Adjustment After Primary Breast Cancer--Results of a  
27 Multicenter Randomized Controlled Trial. *Journal of clinical oncology : official journal of the American Society of Clinical Oncology* 2015;33(25):2763-71. doi:  
28 10.1200/jco.2013.54.9386 [published Online First: 2015/07/15]
- 29  
30 45. Zhu J, Ebert L, Wai-Chi Chan S. Integrative Review on the Effectiveness of Internet-Based Interactive Programs for Women With Breast Cancer Undergoing Treatment.  
31 *Oncol Nurs Forum* 2017;44(2):E42-e54. doi: 10.1188/17.onf.e42-e54 [published Online First: 2017/02/22]
- 32  
33 46. Cruz F, Vilela RA, Ferreira EB, et al. Evidence on the Use of Mobile Apps During the Treatment of Breast Cancer: Systematic Review. *Jmir Mhealth and Uhealth* 2019;7(8)  
34 doi: 10.2196/13245
- 35  
36 47. Willems RA, Bolman CA, Mesters I, et al. Short-term effectiveness of a web-based tailored intervention for cancer survivors on quality of life, anxiety, depression, and  
37 fatigue: randomized controlled trial. *Psycho-oncology* 2017;26(2):222-30. doi: 10.1002/pon.4113 [published Online First: 2016/03/19]
- 38  
39 48. Fang SY, Wang YL, Lu WH, et al. Long-term effectiveness of an E-based survivorship care plan for breast cancer survivors: A quasi-experimental study. *Patient Educ*  
40 *Couns* 2020;103(3):549-55. doi: 10.1016/j.pec.2019.09.012 [published Online First: 2019/09/29]
- 41  
42 49. Fridriksdottir N, Gunnarsdottir S, Zoëga S, et al. Effects of web-based interventions on cancer patients' symptoms: review of randomized trials. *Supportive care in cancer*

- 1  
2  
3  
4  
5 2018;26(2):337-51.
- 6 50. (WHO). WHO. World cancer report 2020. [https://www.iarc.fr/cards\\_page/world-cancer-report/](https://www.iarc.fr/cards_page/world-cancer-report/) 2020
- 7  
8 51. Khan KS, Ter Riet G, Glanville J, et al. Undertaking systematic reviews of research on effectiveness: CRD's guidance for carrying out or commissioning reviews: NHS  
9 Centre for Reviews and Dissemination 2001.
- 10 52. Popay J, Roberts H, Sowden A, et al. Guidance on the conduct of narrative synthesis in systematic reviews. *A product from the ESRC methods programme Version*  
11 *2006;1(1):b92.*
- 12  
13 53. Higgins JP, Altman DG, Gøtzsche PC, et al. The Cochrane Collaboration's tool for assessing risk of bias in randomised trials. *BMJ (Clinical research ed)* 2011;343:d5928.  
14 doi: 10.1136/bmj.d5928 [published Online First: 2011/10/20]
- 15 54. Institute TJB. The Joanna Briggs Institute reviewer's manual: 2016 edition: Australia:The Joanna Briggs Institute.
- 16  
17 55. Dai Shujuan, Hongying W. Application of WeChat-assisted nurse-patient communication in young and middle-aged breast cancer patients after surgery. *Journal of*  
18 *Nursing Science* 2017;32(14):98-100.
- 19 56. Chee W, Lee Y, Im EO, et al. A culturally tailored Internet cancer support group for Asian American breast cancer survivors: A randomized controlled pilot intervention  
20 study. *J Telemed Telecare* 2017;23(6):618-26. doi: 10.1177/1357633x16658369 [published Online First: 2016/08/04]
- 21  
22 57. Zhou Huimin, Wang Jia, Suyun L. Effect of WeChat supported hospital-family collaborative transitional care on postoperative functional recovery in breast cancer  
23 patients. *Journal of Nursing Science* 2019;34(02):63-66.
- 24 58. Xu Haiping, Wang Shui, Sun Ruping, et al. Internet and mobile technology use in case management among breast cancer patients after surgery. *Chinese Nursing*  
25 *Management* 2017;17(11):1540-44.
- 26  
27 59. Wang Lu, Zhou Jie, Wen D. Feasibility analysis and clinical practice in the postoperative nursing care of breast cancer patients with chemotherapy after discharge by  
28 applying APP service platform of mobile phone. *Journal of Qilu Nursing* 2016;22(6):22-24.
- 29  
30 60. Li Xuying, Chen Yongyi, Shi Hanping, et al. The effects of alert system for chemotherapy adverse events among breast cancer patients. *Chinese Journal of Nursing*  
31 2018;53(11):1338-42.
- 32 61. Chen Ying, Chen Lijun, Huang Yingfan, et al. Effect of the tracking intervention based on network information platform on quality of life for breast cancer survivors after  
33 surgery. *Journal of Nursing Science* 2015;30(24):8-10.
- 34  
35 62. Egbring M, Far E, Roos M, et al. A Mobile App to Stabilize Daily Functional Activity of Breast Cancer Patients in Collaboration With the Physician: A Randomized  
36 Controlled Clinical Trial. *J Med Internet Res* 2016;18(9):e238. doi: 10.2196/jmir.6414 [published Online First: 2016/09/08]
- 37  
38 63. !!! INVALID CITATION !!!  
39  
40  
41  
42  
43  
44  
45  
46

- 1  
2  
3  
4  
5 64. Beatty L, Binnion C, Kemp E, et al. A qualitative exploration of barriers and facilitatorsto adherence to an online self-help intervention for cancer-related distress.  
6 *Supportive care in cancer : official journal of the Multinational Association of Supportive Care in Cancer* 2017;25(8):2539-48. doi: 10.1007/s00520-017-3663-2  
7 [published Online First: 2017/03/17]  
8  
9 65. Effects of chemotherapy and hormonal therapy for early breast cancer on recurrence and 15-year survival: an overview of the randomised trials. *Lancet (London,*  
10 *England)* 2005;365(9472):1687-717. doi: 10.1016/s0140-6736(05)66544-0 [published Online First: 2005/05/17]  
11  
12 66. Distress management. Clinical practice guidelines. *Journal of the National Comprehensive Cancer Network : JNCCN* 2003;1(3):344-74. doi: 10.6004/jnccn.2003.0031  
13 [published Online First: 2003/07/01]  
14  
15 67. Kearney N, McCann L, Norrie J, et al. Evaluation of a mobile phone-based, advanced symptom management system (ASyMS©) in the management of  
16 chemotherapy-related toxicity. *Supportive Care in Cancer* 2009;17(4):437-44.  
17  
18 68. Wells AA, Gulbas L, Sanders-Thompson V, et al. African-American breast cancer survivors participating in a breast cancer support group: translating research into  
19 practice. *Journal of Cancer Education* 2014;29(4):619-25.  
20  
21 69. Chen Z, Zhang C, Fan G. Interrelationship between Interpersonal Interaction Intensity and Health Self-Efficacy in People with Diabetes or Prediabetes on Online  
22 Diabetes Social Platforms: An In-Depth Survey in China. *Int J Environ Res Public Health* 2020;17(15) doi: 10.3390/ijerph17155375 [published Online First:  
23 2020/07/30]  
24  
25  
26  
27  
28  
29  
30  
31  
32  
33  
34  
35  
36  
37  
38  
39  
40  
41  
42  
43  
44  
45  
46

1  
2  
3  
4  
5  
6  
7  
8  
9  
10  
11  
12  
13  
14  
15  
16  
17  
18  
19  
20  
21  
22  
23  
24  
25  
26  
27  
28  
29  
30  
31  
32  
33  
34  
35  
36  
37  
38  
39  
40  
41  
42  
43  
44  
45  
46  
47  
48  
49  
50  
51  
52  
53  
54  
55  
56  
57  
58  
59  
60

**Figure Legends**

**Figure 1** Flowchart of Search and Selection Process

For peer review only



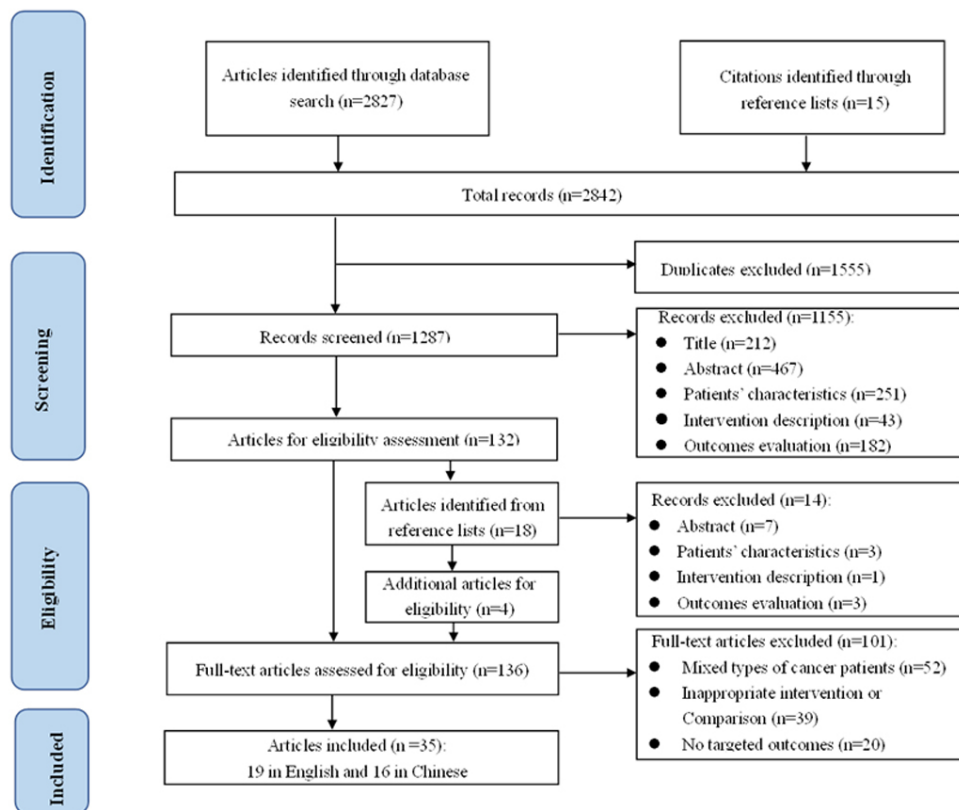

Figure 1. Flowchart of Search and Selection Process.

90x90mm (300 x 300 DPI)

## Web of Science

1.TS=(“Breast Neoplasm\*”) OR TS=(“Breast Cancer\*”) OR TS=(“Breast Carcinoma\*”) OR TS=(“Breast Tumour\*”) OR TS=(“Breast Tumor\*”)

2.TS=(Telemedicine) OR TS=(online) OR TS=(Internet) OR TS=(web) OR TS=(“connected health”) OR TS=(telehealth) OR TS=(e-health) OR TS=(m-health) OR TS=(e-intervention) OR TS=(e-technology) OR TS=(computer) OR TS=( “mobile application”) OR TS=(“mobile device”) OR TS=(“social media”) OR TS=(WeChat).

3. TS=(“patient education”) OR TS=(interven\*) OR TS=(support\*) OR TS=(teach\*) OR TS=(instruction\*) OR TS=(therap\*) OR TS=(program\*) OR TS=(psychoeducat\*) OR TS=(educat\*) OR TS=(rehabilit\*) OR TS=(effect\*) OR TS=(“self-manag\*”) OR TS=(“self manag\*”) OR TS=(“self care”) OR TS=(“self-care”) OR TS=(“self help”) OR TS=(“self-help”) OR TS=(“social support”) OR TS=(“support system\*”) OR TS=(“support group\*”)

4. 1 AND 2 AND 3

## Cochrane Library

1. MeSH descriptor: [Breast Neoplasms] explode all trees

2. (Telemedicine):ti,ab,kw OR (online):ti,ab,kw OR (Internet):ti,ab,kw OR (web):ti,ab,kw OR (“connected health” ):ti,ab,kw OR (telehealth):ti,ab,kw OR (e-health):ti,ab,kw OR (m-health):ti,ab,kw OR (e-intervention):ti,ab,kw OR (e-technology):ti,ab,kw OR (computer):ti,ab,kw OR (“mobile application” ):ti,ab,kw OR (“mobile device” ):ti,ab,kw OR (“social media” ):ti,ab,kw OR (WeChat):ti,ab,kw

3. (“patient education” ):ti,ab,kw OR (interven\*):ti,ab,kw OR (support\*):ti,ab,kw OR (teach\*):ti,ab,kw OR (instruction\*):ti,ab,kw OR (therap\*):ti,ab,kw OR (program\*):ti,ab,kw OR (psychoeducat\*):ti,ab,kw OR (educat\*):ti,ab,kw OR (rehabilit\*):ti,ab,kw OR (effect\*):ti,ab,kw OR (“self-manag\*”):ti,ab,kw OR (“self manag\*” ):ti,ab,kw OR (“self care”):ti,ab,kw OR (“self-care” ):ti,ab,kw OR (“self help”):ti,ab,kw OR (“self-help”):ti,ab,kw OR (“social support”):ti,ab,kw OR (“support system\*”):ti,ab,kw OR (“support group\*”):ti,ab,kw

1  
2  
3  
4 4. #1 AND #2 AND #3  
5  
6  
7

### 8 **PubMed/Medline**

9 1.(((Breast neoplasms[mh] OR ((breast[mh] OR breast diseases[mh]) AND  
10 neoplasms[mh])) AND humans[mh]) OR DCIS[tiab] OR LCIS[tiab] OR ductal  
11 carcinoma in situ[tiab] OR lobular carcinoma in situ[tiab] OR (breast[tiab] AND  
12 (ductal carcinoma\*[ti] OR lobular carcinoma\*[ti])) OR ((Breast[ti] OR mammary[ti])  
13 AND (cancer\*[ti] OR neoplas\*[ti] OR tumor\*[ti] OR tumour\*[ti] OR carcinoma\*[ti]  
14 OR malignan\*[ti] OR sarcoma[ti] OR lymphoma[ti])))

15  
16  
17  
18  
19  
20  
21 2. (“Telemedicine OR online OR Internet OR web OR “connected health” OR  
22 telehealth OR e-health OR m-health OR e-intervention OR e-technology OR  
23 computer OR “mobile application” OR “mobile device” OR “social media” OR  
24 WeChat)

25  
26  
27  
28  
29 3. (“patient education” OR interven\* OR support\* OR teach\* OR instruction\* OR  
30 therap\* OR program\* OR psychoeducat\* OR educat\* OR rehabilit\* OR effect\* OR  
31 “self-manag\*” OR “self manag\*” OR “self care” OR “self-care” OR “self help” OR  
32 “self-help” OR “social support” OR “support system\*” OR “support group\*”)

33  
34  
35  
36  
37 4. #1 AND #2 AND #3  
38  
39

### 40 **PSycINFO**

41  
42 1.exp Breast Neoplasms/  
43

44 2. (breast adj6 cancer\$).mp.  
45

46 3. (breast adj6 neoplasm\$).mp.  
47

48 4. (breast adj6 carcinoma\$).mp.  
49

50 5. (breast adj6 tumour\$).mp.  
51

52 6. (breast adj6 tumor\$).mp.  
53

54 7. 1 OR 2 OR 3 OR 4 OR 5 OR 6  
55

56 8. (“Telemedicine OR online OR Internet OR web OR “connected health” OR  
57 telehealth OR e-health OR m-health OR e-intervention OR e-technology OR  
58 computer OR “mobile application” OR “mobile device” OR “social media” OR  
59  
60

WeChat).af.

9. (“patient education” OR interven\* OR support\* OR teach\* OR instruction\* OR therap\* OR program\* OR psychoeducat\* OR educat\* OR rehabilit\* OR effect\* OR “self-manag\*” OR “self manag\*” OR “self care” OR “self-care” OR “self help” OR “self-help” OR “social support” OR “support system\*” OR “support group\*”).af.

10. 7 AND 8 AND 9

## CINAHL

S1. (MH “Breast Neoplasms+”)

S2. TX breast cancer\*

S3. TX breast neoplasm\*

S4. TX breast carcinoma\*

S5. TX breast tumour\*

S6. S1 OR S2 OR S3 OR S4 OR S5

S7. TX “Telemedicine OR TX online OR TX Internet OR TX web OR TX “connected health” OR TX telehealth OR TX e-health OR TX m-health OR TX e-intervention OR TX e-technology OR TX computer OR TX “mobile application” OR TX “mobile device” OR TX “social media” OR TX WeChat

S8. TX “patient education” OR TX interven\* OR TX support\* OR TX teach\* OR TX instruction\* OR TX therap\* OR TX program\* OR TX psychoeducat\* OR TX educat\* OR TX rehabilit\* OR TX effect\* OR TX “self-manag\*” OR TX “self manag\*” OR TX “self care” OR TX “self-care” OR TX “self help” OR TX “self-help” OR TX “social support” OR TX “support system\*” OR TX “support group\*”

S9.S6 AND S7 AND S8

## CNKI

AB = ('乳腺癌'+ '乳腺肿瘤') AND AB = ('远程医疗'+ '在线'+ '互联网'+ '网络'+ '互联网+医疗'+ '互联网+医疗健康'+ '互联网医疗'+ '电子医疗'+ '移动医疗'+ '移动健康'+ '互联网干预'+ '移动技术'+ '计算机'+ '移动 APP'+ '移动设备'+ '社交媒体'+ '微信') AND

1  
2  
3  
4 AB = ('患者教育'+ '干预'+ '支持'+ '指导' + '治疗' + '方案' + '心理教育' + '教育' + '康  
5 复' + '效果' + '自我管理' + '自我照护' + '自我帮助' + '社会支持' + '支持系统' + '支  
6 持团体')

7  
8  
9  
10  
11  
12  
13 **Wanfang**

14 (乳腺癌+乳腺肿瘤) \* (远程医疗+在线+互联网+网络+ “互联网+医疗”+ “互联网+  
15 医疗健康”+互联网医疗+电子医疗+移动医疗+移动健康+互联网干预+移动技术+  
16 计算机+移动 APP+移动设备+社交媒体+微信) \* (患者教育+干预+支持+指导+  
17 治疗+方案+心理教育+教育+康复+效果+自我管理+自我照护+自我帮助+社会支  
18 持+支持系统+支持团体)

19  
20  
21  
22  
23  
24  
25  
26  
27 **VIP**

28 (U=乳腺癌 OR U=乳腺肿瘤) AND (U=远程医疗 OR U=在线 OR U=互联网 OR  
29 U=网络 OR U=互联网+医疗 OR U=互联网+医疗健康 OR U=互联网医疗 OR U=  
30 电子医疗 OR U=移动医疗 OR U=移动健康 OR U=互联网干预 OR U=移动技术  
31 OR U=计算机 OR U=移动 APP OR U=移动设备 OR U=社交媒体 OR U=微信  
32 ) AND (U=患者教育 OR U=干预 OR U=支持 OR U=指导 OR U=治疗 OR U=方案  
33 OR U=心理教育 OR U=教育 OR U=康复 OR U=效果 OR U=自我管理 OR U=自我  
34 照护 OR U=自我帮助 OR U=社会支持 OR U=支持系统 OR U=支持团体)

35  
36  
37  
38  
39  
40  
41  
42  
43  
44  
45  
46  
47  
48  
49  
50  
51  
52  
53  
54  
55  
56  
57  
58  
59  
60

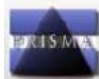

## PRISMA 2020 Checklist

| Section and Topic             | Item # | Checklist item                                                                                                                                                                                                                                                                                       | Location where item is reported |
|-------------------------------|--------|------------------------------------------------------------------------------------------------------------------------------------------------------------------------------------------------------------------------------------------------------------------------------------------------------|---------------------------------|
| <b>TITLE</b>                  |        |                                                                                                                                                                                                                                                                                                      |                                 |
| Title                         | 1      | Identify the report as a systematic review.                                                                                                                                                                                                                                                          | Page 1                          |
| <b>ABSTRACT</b>               |        |                                                                                                                                                                                                                                                                                                      |                                 |
| Abstract                      | 2      | See the PRISMA 2020 for Abstracts checklist.                                                                                                                                                                                                                                                         | Page 2                          |
| <b>INTRODUCTION</b>           |        |                                                                                                                                                                                                                                                                                                      |                                 |
| Rationale                     | 3      | Describe the rationale for the review in the context of existing knowledge.                                                                                                                                                                                                                          | Page3-Page5                     |
| Objectives                    | 4      | Provide an explicit statement of the objective(s) or question(s) the review addresses.                                                                                                                                                                                                               | Page 5                          |
| <b>METHODS</b>                |        |                                                                                                                                                                                                                                                                                                      |                                 |
| Eligibility criteria          | 5      | Specify the inclusion and exclusion criteria for the review and how studies were grouped for the syntheses.                                                                                                                                                                                          | Page5/Page 6                    |
| Information sources           | 6      | Specify all databases, registers, websites, organisations, reference lists and other sources searched or consulted to identify studies. Specify the date when each source was last searched or consulted.                                                                                            | Page 5                          |
| Search strategy               | 7      | Present the full search strategies for all databases, registers and websites, including any filters and limits used.                                                                                                                                                                                 | Appendix A                      |
| Selection process             | 8      | Specify the methods used to decide whether a study met the inclusion criteria of the review, including how many reviewers screened each record and each report retrieved, whether they worked independently, and if applicable, details of automation tools used in the process.                     | Page 6                          |
| Data collection process       | 9      | Specify the methods used to collect data from reports, including how many reviewers collected data from each report, whether they worked independently, any processes for obtaining or confirming data from study investigators, and if applicable, details of automation tools used in the process. | Page 6                          |
| Data items                    | 10a    | List and define all outcomes for which data were sought. Specify whether all results that were compatible with each outcome domain in each study were sought (e.g. for all measures, time points, analyses), and if not, the methods used to decide which results to collect.                        | Table 3/Table 4                 |
|                               | 10b    | List and define all other variables for which data were sought (e.g. participant and intervention characteristics, funding sources). Describe any assumptions made about any missing or unclear information.                                                                                         | Table 3/Table 4                 |
| Study risk of bias assessment | 11     | Specify the methods used to assess risk of bias in the included studies, including details of the tool(s) used, how many reviewers assessed each study and whether they worked independently, and if applicable, details of automation tools used in the process.                                    | Page 6/Page 7                   |
| Effect measures               | 12     | Specify for each outcome the effect measure(s) (e.g. risk ratio, mean difference) used in the synthesis or presentation of results.                                                                                                                                                                  | N/A                             |
| Synthesis methods             | 13a    | Describe the processes used to decide which studies were eligible for each synthesis (e.g. tabulating the study intervention characteristics and comparing against the planned groups for each synthesis (item #5)).                                                                                 | Page5/Page 6                    |
|                               | 13b    | Describe any methods required to prepare the data for presentation or synthesis, such as handling of missing summary statistics, or data conversions.                                                                                                                                                | N/A                             |
|                               | 13c    | Describe any methods used to tabulate or visually display results of individual studies and syntheses.                                                                                                                                                                                               | Page 6                          |
|                               | 13d    | Describe any methods used to synthesize results and provide a rationale for the choice(s). If meta-analysis was performed, describe the model(s), method(s) to identify the presence and extent of statistical heterogeneity, and software package(s) used.                                          | Page 6                          |
|                               | 13e    | Describe any methods used to explore possible causes of heterogeneity among study results (e.g. subgroup analysis, meta-regression).                                                                                                                                                                 | N/A                             |
|                               | 13f    | Describe any sensitivity analyses conducted to assess robustness of the synthesized results.                                                                                                                                                                                                         | N/A                             |
| Reporting bias assessment     | 14     | Describe any methods used to assess risk of bias due to missing results in a synthesis (arising from reporting biases).                                                                                                                                                                              | N/A                             |

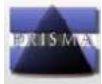

## PRISMA 2020 Checklist

| Section and Topic                              | Item # | Checklist item                                                                                                                                                                                                                                                                       | Location where item is reported |
|------------------------------------------------|--------|--------------------------------------------------------------------------------------------------------------------------------------------------------------------------------------------------------------------------------------------------------------------------------------|---------------------------------|
| Certainty assessment                           | 15     | Describe any methods used to assess certainty (or confidence) in the body of evidence for an outcome.                                                                                                                                                                                | N/A                             |
| <b>RESULTS</b>                                 |        |                                                                                                                                                                                                                                                                                      |                                 |
| Study selection                                | 16a    | Describe the results of the search and selection process, from the number of records identified in the search to the number of studies included in the review, ideally using a flow diagram.                                                                                         | Page 7                          |
|                                                | 16b    | Cite studies that might appear to meet the inclusion criteria, but which were excluded, and explain why they were excluded.                                                                                                                                                          | Page 7                          |
| Study characteristics                          | 17     | Cite each included study and present its characteristics.                                                                                                                                                                                                                            | Page 7-Page 29                  |
| Risk of bias in studies                        | 18     | Present assessments of risk of bias for each included study.                                                                                                                                                                                                                         | Page17-Page 18                  |
| Results of individual studies                  | 19     | For all outcomes, present, for each study: (a) summary statistics for each group (where appropriate) and (b) an effect estimate and its precision (e.g. confidence/credible interval), ideally using structured tables or plots.                                                     | N/A                             |
| Results of syntheses                           | 20a    | For each synthesis, briefly summarise the characteristics and risk of bias among contributing studies.                                                                                                                                                                               | N/A                             |
|                                                | 20b    | Present results of all statistical syntheses conducted. If meta-analysis was done, present for each the summary estimate and its precision (e.g. confidence/credible interval) and measures of statistical heterogeneity. If comparing groups, describe the direction of the effect. | N/A                             |
|                                                | 20c    | Present results of all investigations of possible causes of heterogeneity among study results.                                                                                                                                                                                       | N/A                             |
|                                                | 20d    | Present results of all sensitivity analyses conducted to assess the robustness of the synthesized results.                                                                                                                                                                           | N/A                             |
| Reporting biases                               | 21     | Present assessments of risk of bias due to missing results (arising from reporting biases) for each synthesis assessed.                                                                                                                                                              | N/A                             |
| Certainty of evidence                          | 22     | Present assessments of certainty (or confidence) in the body of evidence for each outcome assessed.                                                                                                                                                                                  | N/A                             |
| <b>DISCUSSION</b>                              |        |                                                                                                                                                                                                                                                                                      |                                 |
| Discussion                                     | 23a    | Provide a general interpretation of the results in the context of other evidence.                                                                                                                                                                                                    | Page 11-13                      |
|                                                | 23b    | Discuss any limitations of the evidence included in the review.                                                                                                                                                                                                                      | Page 14                         |
|                                                | 23c    | Discuss any limitations of the review processes used.                                                                                                                                                                                                                                | Page 14                         |
|                                                | 23d    | Discuss implications of the results for practice, policy, and future research.                                                                                                                                                                                                       | Page 14                         |
| <b>OTHER INFORMATION</b>                       |        |                                                                                                                                                                                                                                                                                      |                                 |
| Registration and protocol                      | 24a    | Provide registration information for the review, including register name and registration number, or state that the review was not registered.                                                                                                                                       | Page 5                          |
|                                                | 24b    | Indicate where the review protocol can be accessed, or state that a protocol was not prepared.                                                                                                                                                                                       | Page 5                          |
|                                                | 24c    | Describe and explain any amendments to information provided at registration or in the protocol.                                                                                                                                                                                      | N/A                             |
| Support                                        | 25     | Describe sources of financial or non-financial support for the review, and the role of the funders or sponsors in the review.                                                                                                                                                        | Page 15                         |
| Competing interests                            | 26     | Declare any competing interests of review authors.                                                                                                                                                                                                                                   | Page 15                         |
| Availability of data, code and other materials | 27     | Report which of the following are publicly available and where they can be found: template data collection forms; data extracted from included studies; data used for all analyses; analytic code; any other materials used in the review.                                           | Page 15                         |

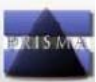

# PRISMA 2020 Checklist

- 1
- 2
- 3
- 4
- 5
- 6
- 7
- 8
- 9
- 10
- 11
- 12
- 13
- 14
- 15
- 16
- 17
- 18
- 19
- 20
- 21
- 22
- 23
- 24
- 25
- 26
- 27
- 28
- 29
- 30
- 31
- 32
- 33
- 34
- 35
- 36
- 37
- 38
- 39
- 40
- 41
- 42
- 43
- 44
- 45
- 46
- 47

From: Page MJ, McKenzie JE, Bossuyt PM, Boutron I, Hoffmann TC, Mulrow CD, et al. The PRISMA 2020 statement: an updated guideline for reporting systematic reviews. *BMJ* 2021;372:n71. doi: 10.1136/bmj.n71

For more information, visit: <http://www.prisma-statement.org/>

For peer review only



## PRISMA Abstract Checklist

| Topic                          | No. | Item                                                                                                                                                                                                                                                                                                  | Reported? |
|--------------------------------|-----|-------------------------------------------------------------------------------------------------------------------------------------------------------------------------------------------------------------------------------------------------------------------------------------------------------|-----------|
| <b>TITLE</b>                   |     |                                                                                                                                                                                                                                                                                                       |           |
| <b>Title</b>                   | 1   | Identify the report as a systematic review.                                                                                                                                                                                                                                                           | Yes       |
| <b>BACKGROUND</b>              |     |                                                                                                                                                                                                                                                                                                       |           |
| <b>Objectives</b>              | 2   | Provide an explicit statement of the main objective(s) or question(s) the review addresses.                                                                                                                                                                                                           | Yes       |
| <b>METHODS</b>                 |     |                                                                                                                                                                                                                                                                                                       |           |
| <b>Eligibility criteria</b>    | 3   | Specify the inclusion and exclusion criteria for the review.                                                                                                                                                                                                                                          | Yes       |
| <b>Information sources</b>     | 4   | Specify the information sources (e.g. databases, registers) used to identify studies and the date when each was last searched.                                                                                                                                                                        | Yes       |
| <b>Risk of bias</b>            | 5   | Specify the methods used to assess risk of bias in the included studies.                                                                                                                                                                                                                              | Yes       |
| <b>Synthesis of results</b>    | 6   | Specify the methods used to present and synthesize results.                                                                                                                                                                                                                                           | Yes       |
| <b>RESULTS</b>                 |     |                                                                                                                                                                                                                                                                                                       |           |
| <b>Included studies</b>        | 7   | Give the total number of included studies and participants and summarise relevant characteristics of studies.                                                                                                                                                                                         | Yes       |
| <b>Synthesis of results</b>    | 8   | Present results for main outcomes, preferably indicating the number of included studies and participants for each. If meta-analysis was done, report the summary estimate and confidence/credible interval. If comparing groups, indicate the direction of the effect (i.e. which group is favoured). | Yes       |
| <b>DISCUSSION</b>              |     |                                                                                                                                                                                                                                                                                                       |           |
| <b>Limitations of evidence</b> | 9   | Provide a brief summary of the limitations of the evidence included in the review (e.g. study risk of bias, inconsistency and imprecision).                                                                                                                                                           | Yes       |
| <b>Interpretation</b>          | 10  | Provide a general interpretation of the results and important implications.                                                                                                                                                                                                                           | Yes       |
| <b>OTHER</b>                   |     |                                                                                                                                                                                                                                                                                                       |           |
| <b>Funding</b>                 | 11  | Specify the primary source of funding for the review.                                                                                                                                                                                                                                                 | Yes       |
| <b>Registration</b>            | 12  | Provide the register name and registration number.                                                                                                                                                                                                                                                    | Yes       |

From: Page MJ, McKenzie JE, Bossuyt PM, Boutron I, Hoffmann TC, Mulrow CD, et al. The PRISMA 2020 statement: an updated guideline for reporting systematic reviews. *MetaArXiv*. 2020, September 14. DOI: 10.31222/osf.io/v7gm2. For more information, visit: [www.prisma-statement.org](http://www.prisma-statement.org)
