# Supplementary material for: Effectiveness of internet-based support interventions on patients with breast cancer: a systematic review and narrative synthesis
Source: PubMed Central journal article supplement — BMJ Open. 2022 May 30;12(5):e057664. doi: 10.1136/bmjopen-2021-057664 (PMC9157353; doi:10.1136/bmjopen-2021-057664), 2022-05-30
Supplement: bmjopen-2021-057664supp001.pdf [file bmjopen-2021-057664supp001.pdf]

### Web of Science

1. TS=(“Breast Neoplasm\*”) OR TS=(“Breast Cancer\*”) OR TS=(“Breast Carcinoma\*”) OR TS=(“Breast Tumour\*”) OR TS=(“Breast Tumor\*”)
2. TS=(Telemedicine) OR TS=(online) OR TS=(Internet) OR TS=(web) OR TS=(“connected health”) OR TS=(telehealth) OR TS=(e-health) OR TS=(m-health) OR TS=(e-intervention) OR TS=(e-technology) OR TS=(computer) OR TS=(“mobile application”) OR TS=(“mobile device”) OR TS=(“social media”) OR TS=(WeChat).
3. TS=(“patient education”) OR TS=(interven\*) OR TS=(support\*) OR TS=(teach\*) OR TS=(instruction\*) OR TS=(therap\*) OR TS=(program\*) OR TS=(psychoeducat\*) OR TS=(educat\*) OR TS=(rehabilit\*) OR TS=(effect\*) OR TS=(“self-manag\*”) OR TS=(“self manag\*”) OR TS=(“self care”) OR TS=(“self-care”) OR TS=(“self help”) OR TS=(“self-help”) OR TS=(“social support”) OR TS=(“support system\*”) OR TS=(“support group\*”)
4. 1 AND 2 AND 3

### Cochrane Library

1. MeSH descriptor: [Breast Neoplasms] explode all trees
2. (Telemedicine):ti,ab,kw OR (online):ti,ab,kw OR (Internet):ti,ab,kw OR (web):ti,ab,kw OR (“connected health”):ti,ab,kw OR (telehealth):ti,ab,kw OR (e-health):ti,ab,kw OR (m-health):ti,ab,kw OR (e-intervention):ti,ab,kw OR (e-technology):ti,ab,kw OR (computer):ti,ab,kw OR (“mobile application”):ti,ab,kw OR (“mobile device”):ti,ab,kw OR (“social media”):ti,ab,kw OR (WeChat):ti,ab,kw
3. (“patient education”):ti,ab,kw OR (interven\*):ti,ab,kw OR (support\*):ti,ab,kw OR (teach\*):ti,ab,kw OR (instruction\*):ti,ab,kw OR (therap\*):ti,ab,kw OR (program\*):ti,ab,kw OR (psychoeducat\*):ti,ab,kw OR (educat\*):ti,ab,kw OR (rehabilit\*):ti,ab,kw OR (effect\*):ti,ab,kw OR (“self-manag\*”):ti,ab,kw OR (“self manag\*”):ti,ab,kw OR (“self care”):ti,ab,kw OR (“self-care”):ti,ab,kw OR (“self help”):ti,ab,kw OR (“self-help”):ti,ab,kw OR (“social support”):ti,ab,kw OR (“support system\*”):ti,ab,kw OR (“support group\*”):ti,ab,kw

4. #1 AND #2 AND #3

### PubMed/Medline

1.(((Breast neoplasms[mh] OR ((breast[mh] OR breast diseases[mh]) AND neoplasms[mh])) AND humans[mh]) OR DCIS[tiab] OR LCIS[tiab] OR ductal carcinoma in situ[tiab] OR lobular carcinoma in situ[tiab] OR (breast[tiab] AND (ductal carcinoma\*[ti] OR lobular carcinoma\*[ti])) OR ((Breast[ti] OR mammary[ti]) AND (cancer\*[ti] OR neoplas\*[ti] OR tumor\*[ti] OR tumour\*[ti] OR carcinoma\*[ti] OR malignan\*[ti] OR sarcoma[ti] OR lymphoma[ti])))

2. (“Telemedicine OR online OR Internet OR web OR “connected health” OR telehealth OR e-health OR m-health OR e-intervention OR e-technology OR computer OR “mobile application” OR “mobile device” OR “social media” OR WeChat)

3. (“patient education” OR interven\* OR support\* OR teach\* OR instruction\* OR therap\* OR program\* OR psychoeducat\* OR educat\* OR rehabilit\* OR effect\* OR “self-manag\*” OR “self manag\*” OR “self care” OR “self-care” OR “self help” OR “self-help” OR “social support” OR “support system\*” OR “support group\*”)

4. #1 AND #2 AND #3

### PSycINFO

1.exp Breast Neoplasms/

2. (breast adj6 cancer\$).mp.

3. (breast adj6 neoplasm\$).mp.

4. (breast adj6 carcinoma\$).mp.

5. (breast adj6 tumour\$).mp.

6. (breast adj6 tumor\$).mp.

7. 1 OR 2 OR 3 OR 4 OR 5 OR 6

8. (“Telemedicine OR online OR Internet OR web OR “connected health” OR telehealth OR e-health OR m-health OR e-intervention OR e-technology OR computer OR “mobile application” OR “mobile device” OR “social media” OR

WeChat).af.

9. (“patient education” OR interven\* OR support\* OR teach\* OR instruction\* OR therap\* OR program\* OR psychoeducat\* OR educat\* OR rehabilit\* OR effect\* OR “self-manag\*” OR “self manag\*” OR “self care” OR “self-care” OR “self help” OR “self-help” OR “social support” OR “support system\*” OR “support group\*”).af.

10. 7 AND 8 AND 9

### **CINAHL**

S1. (MH “Breast Neoplasms+”)

S2. TX breast cancer\*

S3. TX breast neoplasm\*

S4. TX breast carcinoma\*

S5. TX breast tumour\*

S6. S1 OR S2 OR S3 OR S4 OR S5

S7. TX “Telemedicine OR TX online OR TX Internet OR TX web OR TX “connected health” OR TX telehealth OR TX e-health OR TX m-health OR TX e-intervention OR TX e-technology OR TX computer OR TX “mobile application” OR TX “mobile device” OR TX “social media” OR TX WeChat

S8. TX “patient education” OR TX interven\* OR TX support\* OR TX teach\* OR TX instruction\* OR TX therap\* OR TX program\* OR TX psychoeducat\* OR TX educat\* OR TX rehabilit\* OR TX effect\* OR TX “self-manag\*” OR TX “self manag\*” OR TX “self care” OR TX “self-care” OR TX “self help” OR TX “self-help” OR TX “social support” OR TX “support system\*” OR TX “support group\*”

S9.S6 AND S7 AND S8

### **CNKI**

AB = ('乳腺癌'+ '乳腺肿瘤') AND AB = ('远程医疗'+ '在线'+ '互联网'+ '网络'+ '互联网+医疗'+ '互联网+医疗健康'+ '互联网医疗'+ '电子医疗'+ '移动医疗'+ '移动健康'+ '互联网干预'+ '移动技术'+ '计算机'+ '移动 APP'+ '移动设备'+ '社交媒体'+ '微信') AND

AB = ('患者教育'+ '干预'+ '支持'+ '指导' + '治疗' + '方案' + '心理教育' + '教育' + '康复' + '效果' + '自我管理' + '自我照护' + '自我帮助' + '社会支持' + '支持系统' + '支持团体')

### Wanfang

(乳腺癌+乳腺肿瘤) \* (远程医疗+在线+互联网+网络+ “互联网+医疗”+ “互联网+医疗健康”+互联网医疗+电子医疗+移动医疗+移动健康+互联网干预+移动技术+计算机+移动 APP+移动设备+社交媒体+微信) \* (患者教育+干预+支持+指导+治疗+方案+心理教育+教育+康复+效果+自我管理+自我照护+自我帮助+社会支持+支持系统+支持团体)

### VIP

(U=乳腺癌 OR U=乳腺肿瘤) AND (U=远程医疗 OR U=在线 OR U=互联网 OR U=网络 OR U=互联网+医疗 OR U=互联网+医疗健康 OR U=互联网医疗 OR U=电子医疗 OR U=移动医疗 OR U=移动健康 OR U=互联网干预 OR U=移动技术 OR U=计算机 OR U=移动 APP OR U=移动设备 OR U=社交媒体 OR U=微信) AND (U=患者教育 OR U=干预 OR U=支持 OR U=指导 OR U=治疗 OR U=方案 OR U=心理教育 OR U=教育 OR U=康复 OR U=效果 OR U=自我管理 OR U=自我照护 OR U=自我帮助 OR U=社会支持 OR U=支持系统 OR U=支持团体)
